# Supplementary material
Source: PubMed Central journal article supplement (PMC2724224)
Supplement: NIHMS109376-supplement-01.pdf [file NIHMS109376-supplement-01.pdf]

### **Supplemental Table 1**

Genes that show significant differences in their expression across MN cell types. Supplemental Table S1 is a 10 page table. The data in supplement 1 represent the 813 genes that are differentially expressed among cell types. The data are displayed in spreadsheet format with the probe sets listed alphabetically, according to class as defined in Figure 5. Each row represents one probe set, except for probe set 99056\_at, whose name is too long to fit on one line. The information in the columns is as indicated. Statistically significant fold changes are shown in orange ink. Some genes are represented by multiple probe sets (highlighted with violet), and in 18 cases, each of the 2 probe sets for a single gene fell into a different class. When this occurred, the probe sets were moved to the same class if the distribution of signal intensities across cell types was the same for the 2 probe sets. These probe sets are indicated with asterisks (4930553; cyba; mgs; mmp9; nde1; zpf275; atp5c1; Ncam1; ndr4; rex3). While multiple probe sets for a given gene usually produced consistent results, the probe sets for 8 genes produced dissimilar signal distributions and were not moved to the same class. These sixteen probe sets (2 for each of the 8 genes) are indicated by red ink. These discrepancies could represent an alternately spliced and differentially expressed transcript. On the other hand, in many of these cases (5/8) one probe set in the pair reported a strong signal intensity, while the other probe set reported a very low, and perhaps inaccurate, signal.

In some cases, the genes in the list do not appear to be expressed in the LCM population. For example, the transglutaminase 3 gene (class V) is thought to be specifically expressed in the epidermis. The signal intensity associated with the probe set representing this gene is always at or below 20, and it is called absent. Therefore, the inclusion of this gene in the data set most likely represents a false positive (type II) error or some basal expression level. Because it is impossible to establish a criterion for measuring background noise that can be applied to all probe sets on an array, no genes were omitted from the list. Thus, we expect that we have excluded false negative (type I) errors from our data set at the expense of including false positive (type II) errors.

The abbreviations are: G, golgi; N, nucleus; ER, endoplasmic reticulum; EC, extracellular; M, membrane; IC, intracellular; CySk, cytoskeleton; lys, lysosome; mit, mitochondria; mic, microsome

Class I: Genes that are uniquely expressed in all cell types (12)

| Genbank  | Common        | Probeset    | location | Description                           | Function                                         | Fold changes* |         |         | Average Signal Intensities & Standard Deviations |        |         |        |         |         |
|----------|---------------|-------------|----------|---------------------------------------|--------------------------------------------------|---------------|---------|---------|--------------------------------------------------|--------|---------|--------|---------|---------|
|          |               |             |          |                                       |                                                  | IML/LMN       | IML/MMN | LMN/MMN | LMN                                              | SD     | MMN     | SD     | IML     | SD      |
| AW125626 | Cnn3          | 160150_f_at | CySk     | calponin 3, acidic                    | actin binding protein                            | 1.71          | 1.28    | 0.75    | 1178.00                                          | 88.00  | 1566.71 | 274.84 | 2013.12 | 189.38  |
| X15052   | Ncam1         | 100153_at   | M, EC    | neural cell adhesion molecule 1       | cell adhesion, synaptic transmission, plasticity | 2.50          | 1.83    | 0.73    | 459.98                                           | 81.79  | 629.06  | 93.95  | 1148.35 | 178.60  |
| AV324706 | **Ncam1       | 161750_f_at |          |                                       |                                                  | 1.76          | 1.55    | 0.89    | 131.59                                           | 17.33  | 148.67  | 16.09  | 231.11  | 54.27   |
| A1852470 | Nme3          | 94981_i_at  | EC       | nucleoside diphosphate kinase DR-nm23 | nucleotide biosynthesis                          | 1.43          | 1.18    | 0.83    | 324.74                                           | 18.36  | 391.93  | 23.46  | 462.84  | 55.10   |
| A1852470 | Nme3          | 94982_f_at  |          |                                       |                                                  | 1.60          | 1.23    | 0.77    | 603.27                                           | 39.26  | 785.07  | 75.76  | 963.32  | 140.90  |
| AB007136 | Psmc1; PA28a  | 101510_at   | IC       | proteasome activator PA28a            | proteolysis                                      | 2.34          | 1.59    | 0.68    | 83.03                                            | 20.08  | 121.67  | 29.82  | 193.94  | 24.73   |
| AW121600 | **Ndr4        | 160819_at   | IC       | N-myc downstream regulated 4          | unknown                                          | 0.82          | 0.89    | 1.08    | 9487.97                                          | 535.66 | 8819.17 | 331.97 | 7810.90 | 657.43  |
| AV329719 | **Ndr4        | 161998_f_at |          |                                       |                                                  | 0.79          | 0.95    | 1.20    | 1544.27                                          | 244.94 | 1288.05 | 56.27  | 1217.22 | 51.53   |
| AA790008 | Rex3          | 93021_at    | IC, N    | reduced expression 3                  | unknown                                          | 2.04          | 1.58    | 0.77    | 211.07                                           | 15.58  | 273.13  | 40.72  | 431.14  | 66.48   |
| AF051347 | **Rex3        | 93020_at    |          |                                       |                                                  | 2.05          | 1.73    | 0.84    | 39.20                                            | 5.60   | 46.44   | 5.79   | 80.38   | 21.95   |
| AV150522 | Rpl10         | 161657_f_at | IC       | ribosomal protein 10                  | protein biosynthesis                             | 1.31          | 1.15    | 0.88    | 835.51                                           | 43.39  | 951.92  | 69.16  | 1096.31 | 83.20   |
| AV150997 | Sclt6a2       | 162219_f_at | M        | solute carrier family 16, member 2    | monocarboxylic acid transport                    | 1.37          | 1.15    | 0.84    | 44.55                                            | 3.43   | 53.13   | 4.96   | 60.99   | 3.85    |
| X13986   | Spp1          | 97519_at    | EC       | secreted phosphoprotein 1             | cell adhesion, cytokine activity                 | 0.51          | 0.69    | 1.36    | 3754.97                                          | 328.59 | 2758.02 | 340.15 | 1902.64 | 425.02  |
| A1153693 | Zfp275        | 104002_at   | IC, N    | Zinc finger protein 275               | transcription factor                             | 1.31          | 1.16    | 0.89    | 113.41                                           | 9.86   | 127.99  | 7.41   | 149.00  | 7.14    |
| AV124943 | **Zfp275      | 161503_f_at |          |                                       |                                                  | 1.19          | 1.12    | 0.94    | 21.17                                            | 1.70   | 22.44   | 1.95   | 25.16   | 2.60    |
| A1838836 | 6330403K07Rik | 95559_at    |          | RIKEN cDNA 6330403K07 gene            | unknown                                          | 2.75          | 1.74    | 0.63    | 1431.69                                          | 442.50 | 2271.21 | 335.95 | 3941.51 | 1238.17 |
| AV161034 | 6330403K07Rik | 161354_f_at |          |                                       |                                                  | 1.94          | 1.46    | 0.75    | 188.45                                           | 15.87  | 249.97  | 35.97  | 365.17  | 66.46   |
| A1834976 | C330011J09    | 104413_at   |          | hypothetical protein C330011J09       | unknown                                          | 1.42          | 1.16    | 0.82    | 159.90                                           | 14.05  | 195.38  | 21.47  | 226.52  | 15.52   |

Class II: Genes that are uniquely expressed in IML (149)

| Genbank  | Common         | Probeset    | location | Description                                         | Function                                  | Fold changes* |         |         | Average Signal Intensities & Standard Deviations |        |         |        |         |        |
|----------|----------------|-------------|----------|-----------------------------------------------------|-------------------------------------------|---------------|---------|---------|--------------------------------------------------|--------|---------|--------|---------|--------|
|          |                |             |          |                                                     |                                           | IML/LMN       | IML/MMN | LMN/MMN | LMN                                              | SD     | MMN     | SD     | IML     | SD     |
| AA690434 | Ace2           | 160986_f_at | M, EC    | angiotensin I converting enzyme                     | proteolysis and peptidolysis              | 1.15          | 1.18    | 1.02    | 13.34                                            | 1.10   | 13.08   | 0.40   | 15.40   | 1.26   |
| AB009673 | Adam23         | 92357_at    | M        | disintegrin & metalloprotease domain 23             | proteolysis and peptidolysis              | 0.76          | 0.78    | 1.03    | 470.07                                           | 30.15  | 456.37  | 68.81  | 355.94  | 53.01  |
| U12919   | Adcy7          | 103392_at   | EC       | adenylate cyclase 7                                 | signal transduction                       | 1.72          | 1.76    | 1.02    | 161.23                                           | 28.96  | 158.30  | 42.21  | 278.05  | 43.15  |
| AB010149 | Adcyap1; PACAP | 92200_at    | M        | PACAP ligand precursor                              | neuropeptide hormone                      | 3.60          | 3.08    | 0.86    | 211.08                                           | 190.76 | 246.59  | 102.66 | 796.66  | 389.44 |
| AF004326 | Agpt2          | 92210_at    | EC       | angiopoietin 2                                      | promotes angiogenesis                     | 1.54          | 1.41    | 0.92    | 42.12                                            | 9.12   | 45.87   | 9.63   | 64.72   | 13.39  |
| AW061337 | Ak4            | 99595_at    | mit      | adenylate kinase 4                                  | nucleotide transport & metabolism         | 1.38          | 1.37    | 1.00    | 56.10                                            | 10.76  | 56.34   | 10.53  | 77.15   | 10.82  |
| AB020239 | Ak4            | 99521_at    |          |                                                     |                                           | 1.14          | 1.14    | 1.00    | 40.39                                            | 2.12   | 40.36   | 3.69   | 45.93   | 3.66   |
| AF020313 | Apbb1ip        | 102710_at   | N        | amyloid beta (A4) precursor protein-binding protein | signal transduction, transcription factor | 1.83          | 1.72    | 0.94    | 35.86                                            | 2.41   | 38.01   | 5.60   | 65.48   | 30.49  |
| AW215551 | Arhgap9        | 103365_s_at |          | Rho GTPase activating protein 9                     | signal transduction                       | 0.76          | 0.80    | 1.05    | 135.86                                           | 10.01  | 129.76  | 8.71   | 103.82  | 12.96  |
| A1117236 | Arhgap9        | 103366_at   |          |                                                     |                                           | 0.83          | 0.89    | 1.07    | 147.37                                           | 11.76  | 137.55  | 7.58   | 122.30  | 14.66  |
| AA870675 | Atp5c1         | 92799_g_at  | mit      | ATP synthase, F1 gamma polypeptide 1                | ATP synthesis; proton transport           | 0.83          | 0.76    | 0.92    | 2814.53                                          | 266.68 | 3058.26 | 448.28 | 2322.67 | 219.90 |
| A1836694 | **Atp5c1       | 92800_i_at  |          |                                                     |                                           | 0.87          | 0.85    | 0.98    | 4897.43                                          | 509.41 | 5021.02 | 440.49 | 4265.96 | 140.02 |
| M64298   | Atp6v0c        | 96919_at    | lys      | ATPase, V0 subunit C                                | proton pump                               | 0.81          | 0.87    | 1.08    | 8609.77                                          | 495.68 | 8001.62 | 566.38 | 6959.80 | 746.94 |
| A1843029 | Atp6v1b2       | 92598_at    | lys      | ATPase, V1 subunit B                                | proton pump                               | 0.89          | 0.90    | 1.00    | 6109.35                                          | 223.91 | 6088.81 | 189.09 | 5466.73 | 492.64 |
| AW107884 | AW107884       | 93829_at    | IC       | ROD1 homolog [Rattus norvegicus]                    | RNA processing & modification             | 2.28          | 2.00    | 0.88    | 30.18                                            | 5.46   | 34.32   | 12.25  | 68.69   | 27.48  |
| X01838   | B2m            | 93088_at    | M, EC    | beta-2 microglobulin                                | small subunit MHC I receptor              | 662.22        | 113.37  | 0.73    | 662.22                                           | 113.37 | 910.26  | 287.76 | 1388.77 | 275.21 |
| A1844631 | Baiap2         | 99337_at    | IC       | angiogenesis inhibitor 1-associated protein 2       | Rho protein signal transduction           | 1.37          | 1.33    | 0.97    | 61.88                                            | 5.03   | 63.99   | 7.07   | 85.03   | 17.62  |
| U42443   | Bcat1          | 100026_at   | IC       | branched chain aminotransferase 1                   | amino acid metabolism                     | 0.63          | 0.75    | 1.18    | 2598.70                                          | 152.63 | 2201.62 | 380.81 | 1647.20 | 297.39 |
| M22531   | C1qb           | 96020_at    | EC       | complement component 1q beta polypeptide            | complement activity                       | 1.46          | 1.33    | 0.91    | 58.84                                            | 6.66   | 64.50   | 14.16  | 85.78   | 10.18  |
| K02782   | C3             | 93497_at    | EC       | complement component 3                              | complement activity                       | 2.61          | 1.81    | 0.70    | 97.18                                            | 18.14  | 139.77  | 47.79  | 253.45  | 69.08  |
| AW125070 | C630022N07Rik  | 96147_at    | IC, N    | RIKEN cDNA C630022N07 gene                          | predicted transcription factor            | 0.83          | 0.88    | 1.06    | 202.99                                           | 15.20  | 191.75  | 10.34  | 169.31  | 6.63   |
| AJ10949  | Caena2d3       | 98300_at    | M        | calcium channel, alpha2/delta subunit 3             | Ca channel regulatory subunit             | 0.56          | 0.67    | 1.20    | 696.07                                           | 100.17 | 579.00  | 74.09  | 386.42  | 49.73  |
| U49513   | Ccl9           | 104388_at   | EC       | chemokine (C-C motif) ligand 9                      | signal transduction                       | 1.39          | 1.28    | 0.92    | 57.47                                            | 3.38   | 62.55   | 6.38   | 79.82   | 7.79   |
| U56819   | Ccr2           | 93397_at    | M        | chemokine (C-C) receptor 2                          | signal transduction                       | 1.27          | 1.30    | 1.02    | 31.32                                            | 2.43   | 30.68   | 3.55   | 39.86   | 5.74   |
| AV370035 | Cor5           | 161968_f_at | M        | chemokine (C-C motif) receptor 5                    | signal transduction                       | 1.51          | 1.70    | 1.13    | 39.85                                            | 13.13  | 35.28   | 3.48   | 59.98   | 16.88  |
| X97227   | Cd53           | 94939_at    | M        | CD53 antigen                                        | modulates cell-ECM interaction            | 2.24          | 1.99    | 0.89    | 39.68                                            | 8.11   | 44.76   | 14.83  | 89.01   | 53.01  |
| U60473   | Cd59a          | 101516_at   | M, EC    | CD59a antigen                                       | complement activity                       | 0.78          | 0.80    | 1.03    | 2333.06                                          | 192.37 | 2257.15 | 205.82 | 1810.77 | 161.36 |
| AF101644 | Cdkap1         | 98532_at    | IC       | CDK2-associated protein 1                           | cell growth and/or maintenance            | 0.78          | 0.79    | 1.01    | 793.06                                           | 63.54  | 784.33  | 92.13  | 619.54  | 73.28  |
| AF012708 | Cenpc          | 98770_at    | N        | centromere protein C (Cenp-c)                       | chromosome organization & biogenesis      | 1.23          | 1.21    | 0.98    | 136.80                                           | 14.95  | 139.33  | 16.95  | 168.37  | 11.73  |
| AF011450 | Col15a1        | 99637_at    | EC       | procollagen, type XV                                | ECM structural constituent                | 1.46          | 1.28    | 0.88    | 95.13                                            | 9.71   | 108.00  | 21.04  | 138.69  | 12.32  |
| AW049031 | Copeb          | 98083_at    | N        | core promoter element binding protein               | transcription factor coactivator          | 1.55          | 1.40    | 0.90    | 489.10                                           | 60.66  | 541.95  | 96.69  | 759.39  | 149.86 |
| AI020792 | Copg1          | 96936_at    | ER, G    | coatamer protein, subunit gamma 1                   | intracellular protein transport           | 0.76          | 0.81    | 1.06    | 780.64                                           | 90.44  | 736.29  | 58.83  | 595.39  | 104.21 |
| X06368   | Csf1r          | 104354_at   | M        | colony stimulating factor 1 receptor                | signal transduction                       | 1.48          | 1.34    | 0.90    | 169.83                                           | 18.30  | 188.50  | 30.00  | 251.72  | 51.16  |
| X15591   | Ctla2a         | 96912_s_at  | N        | cytotoxic T lymphocyte-associated protein 2alpha    | unknown                                   | 1.73          | 1.77    | 1.02    | 88.30                                            | 29.77  | 86.32   | 21.14  | 152.77  | 44.43  |
| U74683   | Ctsc           | 101019_at   | lys, EC  | cathepsin C preproprotein                           | proteolysis and peptidolysis              | 2.06          | 1.66    | 0.81    | 46.57                                            | 19.13  | 57.78   | 28.55  | 96.08   | 17.39  |
| AJ223208 | Ctss           | 98543_at    | lys, EC  | cathepsin S preproprotein                           | proteolysis and peptidolysis              | 1.92          | 1.69    | 0.88    | 624.07                                           | 123.03 | 710.46  | 236.09 | 1201.30 | 355.01 |
| AW046124 | Cyba           | 97013_f_at  | mit      | cytochrome b-245, alpha polypeptide                 | electron transport                        | 1.45          | 1.35    | 0.93    | 70.78                                            | 5.26   | 76.00   | 14.46  | 102.88  | 23.76  |
| M31775   | **Cyba         | 100059_at   |          |                                                     |                                           | 1.30          | 1.19    | 0.91    | 239.22                                           | 20.20  | 261.72  | 32.13  | 310.26  | 65.72  |
| AB011678 | Dcx            | 102307_at   | CySk     | doublecortin                                        | cytoskeletal complex constituent          | 1.27          | 1.26    | 0.99    | 91.95                                            | 15.34  | 92.56   | 14.08  | 116.43  | 6.79   |
| AB009376 | Dffa           | 99485_at    | IC       | DNA fragmentation factor, alpha subunit             | apoptosis regulator                       | 0.43          | 0.58    | 1.35    | 540.16                                           | 145.93 | 400.76  | 107.89 | 234.18  | 75.78  |
| A1182272 | Dffa           | 160866_at   |          |                                                     |                                           | 0.49          | 0.59    | 1.19    | 2643.32                                          | 668.43 | 2218.30 | 654.46 | 1299.17 | 254.02 |
| A1846152 | Dscr1          | 100555_at   | IC, N    | Down syndrome critical region homolog 1             | calcium-mediated signaling                | 0.74          | 0.78    | 1.06    | 784.07                                           | 125.10 | 741.25  | 65.58  | 579.01  | 99.97  |
| AV122030 | Dscr3          | 162486_f_at | IC       | Down syndrome critical region gene 3                | intracellular protein transport           | 0.84          | 0.89    | 1.06    | 879.30                                           | 70.82  | 828.89  | 45.37  | 738.35  | 39.51  |
| AA624336 | Dxymk          | 98618_at    |          | deoxythymidylate kinase                             | nucleotide biosynthesis                   | 0.87          | 0.89    | 1.02    | 154.03                                           | 2.58   | 150.85  | 16.03  | 133.89  | 3.45   |
| AW212878 | E2em-pending   | 104065_at   | ER       | ER degradation enhancer, mannosidase                | ER-associated protein catabolism          | 1.14          | 1.11    | 0.97    | 42.65                                            | 0.81   | 43.00   | 0.17   | 44.43   | 0.38   |
| AW123850 | F2r            | 95474_at    | M        | thrombin receptor                                   | signal transduction                       | 2.03          | 1.78    | 0.88    | 662.17                                           | 193.49 | 752.40  | 146.20 | 1341.07 | 321.28 |
| X59398   | Fli3           | 95295_s_at  | M        | FMS-like tyrosine kinase 3                          | signal transduction                       | 0.63          | 0.70    | 1.11    | 1044.99                                          | 108.49 | 938.68  | 143.52 | 659.30  | 106.42 |
| AA960459 | Flnp2, srGap3  | 96516_at    | IC       | formin binding protein 2                            | signal transduction                       | 0.75          | 0.81    | 1.07    | 118.65                                           | 8.63   | 110.45  | 8.56   | 89.54   | 7.82   |
| L13204   | Foxj1          | 98831_at    | N        | forkhead box J1                                     | transcription factor                      | 0.85          | 0.81    | 0.96    | 421.04                                           | 38.05  | 440.07  | 40.85  | 357.49  | 28.53  |
| A1839918 | Gars           | 93270_at    | IC       | glycyl-tRNA synthetase                              | protein biosynthesis                      | 0.73          | 0.71    | 0.98    | 865.12                                           | 138.73 | 881.10  | 99.01  | 627.65  | 115.65 |
| U85414   | Gclc           | 99649_at    | IC       | glutamate-cysteine ligase, catalytic subunit        | glutathione biosynthesis                  | 0.86          | 0.88    | 1.02    | 555.67                                           | 38.33  | 546.43  | 40.60  | 480.19  | 31.58  |
| Y17851   | Gdap2          | 104134_at   | N        | ganglioside-induced differentiation-                |                                           |               |         |         |                                                  |        |         |        |         |        |

|          |                  |             |         |                                                                                                |                                                          |      |      |      |         |         |         |        |         |         |
|----------|------------------|-------------|---------|------------------------------------------------------------------------------------------------|----------------------------------------------------------|------|------|------|---------|---------|---------|--------|---------|---------|
| AF023482 | Hs1bp1           | 101096_s_at | mit, ER | HS1 binding protein                                                                            | signal transduction                                      | 0.76 | 0.77 | 1.02 | 587.91  | 69.12   | 578.68  | 56.57  | 448.09  | 99.03   |
| A1574278 | Ide              | 160290_at   | EC      | insulin degrading enzyme                                                                       | proteolysis and peptidolysis                             | 0.74 | 0.78 | 1.05 | 86.68   | 7.83    | 82.79   | 12.92  | 64.28   | 7.43    |
| Y15001   | Irx3             | 99034_at    | N       | Iroquois related homeobox 3 (Drosophila)                                                       | transcription factor                                     | 0.46 | 0.51 | 1.09 | 170.47  | 73.72   | 155.92  | 41.34  | 79.01   | 12.20   |
| Y16518   | Lanc1            | 103656_at   | M       | LanC-like protein 1, GPCR 69                                                                   | GPCR, signal transduction                                | 0.71 | 0.78 | 1.09 | 1623.74 | 156.32  | 1486.32 | 216.49 | 1160.92 | 141.39  |
| AW123934 | Laptm4b          | 100571_at   | lys     | lysosomal associated protein                                                                   | lysosome transmembrane protein                           | 0.64 | 0.71 | 1.12 | 4575.58 | 554.55  | 4089.53 | 418.61 | 2914.02 | 456.15  |
| U29539   | Laptm5           | 100012_at   | lys     | lysosomal associated protein                                                                   | lysosome transmembrane protein                           | 1.45 | 1.40 | 0.96 | 340.45  | 25.75   | 353.28  | 25.00  | 493.37  | 135.37  |
| AA726364 | Ipl              | 95611_at    | EC      | lipoprotein lipase                                                                             | lipid metabolism                                         | 2.75 | 2.18 | 0.79 | 59.35   | 7.37    | 74.69   | 31.28  | 162.93  | 109.02  |
| AF045573 | Lrrfip1          | 92563_at    |         | leucine rich repeat interacting protein 1                                                      | unknown                                                  | 0.85 | 0.88 | 1.04 | 583.59  | 56.97   | 562.22  | 21.00  | 494.83  | 32.33   |
| U72644   | Lst1             | 103571_at   |         | leukocyte specific transcript 1                                                                | unknown                                                  | 1.55 | 1.43 | 0.92 | 190.20  | 3.64    | 206.28  | 13.55  | 295.38  | 79.58   |
| M21050   | lys              | 100611_at   | EC, mit | lysozyme                                                                                       | carbohydrate metabolism                                  | 4.49 | 2.82 | 0.63 | 44.54   | 16.27   | 71.04   | 37.29  | 200.10  | 188.88  |
| AJ243608 | Magel2           | 92681_at    |         | melanoma antigen                                                                               | unknown                                                  | 1.45 | 1.33 | 0.92 | 61.27   | 4.75    | 66.36   | 2.04   | 85.56   | 6.33    |
| AW259500 | Map3k7ip2        | 160309_at   | IC      | MAPKKK 7 interacting protein 2                                                                 | signal transduction                                      | 1.53 | 1.43 | 0.94 | 496.70  | 61.13   | 530.47  | 109.53 | 757.49  | 134.23  |
| Y13439   | Mapk12           | 92323_at    | IC      | mitogen-activated protein kinase 12                                                            | unknown                                                  | 0.84 | 0.82 | 0.97 | 377.30  | 14.36   | 389.23  | 31.90  | 317.83  | 44.60   |
| M60474   | MARCKS           | 96865_at    | M       | myristoylated alanine rich PKC substrate                                                       | actin & calmodulin binding                               | 2.59 | 1.74 | 0.67 | 277.09  | 71.64   | 413.22  | 145.09 | 718.12  | 87.82   |
| X72795   | Mmp9             | 99957_at    | EC      | matrix metalloproteinase 9                                                                     | proteolysis and peptidolysis                             | 0.51 | 0.68 | 1.35 | 393.23  | 104.18  | 291.36  | 26.91  | 198.85  | 44.93   |
| AV239570 | **Mmp9           | 162369_f_at |         |                                                                                                |                                                          | 0.70 | 0.91 | 1.30 | 26.40   | 7.08    | 20.35   | 2.22   | 18.52   | 3.62    |
| L20315   | Mpeg1            | 99071_at    |         | macrophage expressed gene 1                                                                    | unknown                                                  | 1.35 | 1.29 | 0.96 | 225.81  | 14.63   | 236.12  | 19.93  | 304.21  | 56.42   |
| AJ22362  | Mylh7            | 98616_f_at  | CySk    | myosin, heavy polypeptide 7                                                                    | cytoskeletal organization                                | 1.52 | 1.44 | 0.95 | 84.79   | 7.50    | 89.36   | 8.53   | 128.78  | 33.19   |
| AW047320 | Ndel1            | 98882_s_at  | IC      | nuclear distribution gene E-like homolog 1                                                     | retrograde axon transport, CySk interacting protein      | 0.75 | 0.84 | 1.13 | 1633.64 | 41.33   | 1444.58 | 139.72 | 1217.07 | 149.68  |
| AI837311 | **Ndel1          | 98884_r_at  |         |                                                                                                |                                                          | 0.66 | 0.90 | 1.37 | 926.55  | 289.74  | 676.97  | 91.17  | 610.32  | 93.35   |
| AW046205 | Ndufa4           | 160477_at   | mit     | NADH dehydrogenase 1 alpha subcomplex, 4                                                       | electron transport chain                                 | 0.86 | 0.89 | 1.04 | 33.09   | 1.65    | 31.95   | 1.91   | 28.56   | 2.41    |
| M35131   | Nehf             | 103234_at   | CySk    | neurofilament, heavy polypeptide                                                               | cytoskeleton organization & biogenesis                   | 0.49 | 0.64 | 1.32 | 6286.97 | 1515.16 | 4778.15 | 796.94 | 3080.17 | 637.30  |
| AI846534 | Nek6             | 160846_at   |         | NIMA-related expressed kinase 6                                                                | signal transduction                                      | 0.87 | 0.85 | 0.99 | 185.95  | 11.00   | 188.72  | 16.35  | 161.16  | 16.78   |
| M17298   | Ngfb             | 102298_at   | EC      | nerve growth factor, beta                                                                      | growth & maintenance, signal transduction                | 0.87 | 0.89 | 1.01 | 32.01   | 2.59    | 31.56   | 2.19   | 27.93   | 1.44    |
| AV372577 | Npy2r            | 162037_f_at | M       | neuropeptide Y receptor Y2                                                                     | neuropeptide signal transduction                         | 1.91 | 1.89 | 0.99 | 234.17  | 27.65   | 235.89  | 14.57  | 446.90  | 174.57  |
| D86238   | Npy2r            | 100703_at   |         |                                                                                                |                                                          | 1.38 | 1.41 | 1.02 | 49.00   | 2.00    | 48.00   | 5.52   | 67.51   | 12.70   |
| D13664   | Osf2-pending     | 92593_at    | EC      | periostin                                                                                      | cell adhesion, transcription factor                      | 3.07 | 2.67 | 0.87 | 36.42   | 12.52   | 41.88   | 19.12  | 111.72  | 78.27   |
| AW046590 | Pcdd             | 99056_at    | IC, N   | 6-pyruvoyl-tetrahydropterin synthase/<br>dimerization cofactor of hepatocyte nuclear factor 1α | L-phenylalanine metabolism/<br>transcription coactivator | 1.45 | 1.35 | 0.93 | 331.52  | 66.89   | 354.71  | 82.96  | 480.38  | 30.31   |
| AA755004 | Pdir-pending     | 96831_at    |         | protein disulfide isomerase-related                                                            |                                                          | 1.26 | 1.32 | 1.05 | 58.64   | 3.21    | 55.93   | 7.41   | 73.62   | 9.95    |
| AI842259 | Pdk3             | 92810_at    | mit     | pyruvate dehydrogenase kinase, isoenzyme 3                                                     | phosphorylates pyruvate dehydr.                          | 0.61 | 0.75 | 1.23 | 666.71  | 88.65   | 540.48  | 117.78 | 405.10  | 45.21   |
| M55181   | Penk1            | 84516_f_at  | EC      | preproenkephalin 1                                                                             | neuropeptide signal transduction                         | 3.15 | 2.43 | 0.77 | 1506.34 | 665.09  | 1950.34 | 586.98 | 4748.73 | 1129.00 |
| M55181   | Penk1            | 84516_r_at  |         |                                                                                                |                                                          | 1.74 | 1.51 | 0.87 | 139.27  | 14.63   | 159.78  | 8.72   | 241.89  | 60.47   |
| M68915   | Pgr              | 98726_at    | IC, N   | progesterone receptor                                                                          | steroid hormone signal transduction                      | 0.90 | 0.89 | 0.99 | 22.09   | 0.63    | 22.35   | 0.70   | 19.97   | 0.99    |
| AJ242864 | Phf1             | 94406_at    |         | putative homeodomain transcription factor                                                      | transcription regulation                                 | 0.83 | 0.84 | 1.01 | 334.29  | 40.82   | 329.95  | 34.56  | 277.28  | 19.99   |
| AV378129 | Ppfpbp2          | 162129_f_at | IC      | tyrosine phosphatase receptor F interacting protein                                            | signal transduction                                      | 1.15 | 1.09 | 0.95 | 11.30   | 0.41    | 11.88   | 0.49   | 12.98   | 0.72    |
| AV281930 | Prm2             | 161229_at   |         | protamine 2                                                                                    |                                                          | 0.84 | 0.85 | 1.01 | 19.91   | 1.83    | 19.66   | 1.91   | 16.66   | 0.63    |
| AW122465 | Prp19_snev       | 97395_at    | N       | PRP19/PSO4 homolog (S. cerevisiae)                                                             | nuclear matrix protein                                   | 0.73 | 0.75 | 1.03 | 1730.46 | 226.76  | 1677.50 | 309.27 | 1264.62 | 236.32  |
| AB007696 | Ptger2           | 98768_at    | M       | prostaglandin E receptor 2                                                                     | eicosanoid hormone signal transduction                   | 1.10 | 1.13 | 1.03 | 19.48   | 0.83    | 18.99   | 1.04   | 21.49   | 0.76    |
| D10204   | Ptger3           | 96588_at    | M       | prostaglandin E receptor 3                                                                     | eicosanoid hormone signal transduction                   | 1.18 | 1.16 | 0.98 | 10.49   | 0.56    | 10.68   | 0.72   | 12.40   | 1.16    |
| U37465   | Ptpro            | 100427_at   | M       | protein tyrosine phosphatase, receptor type, O                                                 | signal transduction                                      | 1.38 | 1.24 | 0.91 | 176.83  | 12.45   | 194.75  | 24.45  | 240.63  | 28.83   |
| AI891912 | Pvrl3            | 99062_at    | M       | poliovirus receptor-related 3                                                                  | cell adhesion                                            | 1.26 | 1.22 | 0.95 | 16.19   | 1.51    | 17.04   | 1.31   | 20.71   | 1.31    |
| AB030505 | Rdh11            | 99592_f_at  | M       | retinol dehydrogenase 11                                                                       | retinoid metabolism                                      | 1.23 | 1.15 | 0.93 | 994.46  | 40.44   | 1064.57 | 74.03  | 1219.77 | 79.49   |
| AI835968 | Rin2             | 160827_at   | IC      | Ras and Rab interactor 2                                                                       | secretion, vesicular transport, signaling                | 1.82 | 1.39 | 0.76 | 317.55  | 40.33   | 416.24  | 120.04 | 578.20  | 85.36   |
| L08651   | Rpl29            | 94240_i_at  |         | ribosomal protein L29                                                                          | protein biosynthesis                                     | 1.62 | 1.45 | 0.90 | 194.34  | 36.69   | 216.07  | 17.41  | 313.92  | 79.27   |
| U41341   | S100a11          | 98600_at    | IC, N   | S100 calcium binding protein A11 (calizzarin)                                                  | cytokine activity                                        | 4.05 | 2.22 | 0.55 | 107.52  | 28.22   | 195.99  | 83.90  | 435.39  | 225.18  |
| X68837   | Scg2; Chgc; Sgll | 92981_at    | EC      | secretogranin II                                                                               | calcium binding                                          | 1.43 | 1.44 | 1.01 | 598.54  | 128.03  | 592.51  | 76.28  | 855.68  | 90.06   |
| X91144   | Sepl1            | 103488_at   | M       | selectin, platelet (p-selectin) ligand                                                         | cell adhesion                                            | 1.16 | 1.14 | 0.98 | 199.26  | 12.36   | 202.96  | 20.52  | 230.67  | 13.25   |
| AJ239082 | Sh3bgr           | 96204_at    |         | SH3-binding domain glutamic acid-rich protein                                                  | unknown                                                  | 0.69 | 0.77 | 1.12 | 241.69  | 19.84   | 216.27  | 11.03  | 167.39  | 20.06   |
| AW048272 | Sh3bgr           | 96205_at    |         |                                                                                                |                                                          | 0.49 | 0.54 | 1.09 | 1308.13 | 140.05  | 1197.38 | 143.16 | 641.77  | 91.45   |
| AF038848 | Sin3b            | 93789_s_at  | N       | transcriptional regulator, SIN3B (yeast)                                                       | regulates transcription                                  | 1.23 | 1.16 | 0.95 | 238.06  | 23.77   | 251.70  | 25.01  | 293.20  | 20.41   |
| U73521   | Sic1a1           | 104747_at   |         | solute carrier family 1, member 1                                                              |                                                          | 0.66 | 0.72 | 1.10 | 290.25  | 24.58   | 264.32  | 35.92  | 191.53  | 27.83   |
| U70859   | Sic7a3           | 93133_at    | M       | cationic amino acid transporter, y+ system                                                     | glutamate symporter                                      | 1.23 | 1.25 | 1.01 | 127.00  | 12.78   | 125.27  | 11.30  | 156.03  | 15.10   |
| AW120567 | Snx9             | 160593_at   | IC      | sorting nexin 9                                                                                | intracellular protein transport, endocytosis             | 1.24 | 1.21 | 0.98 | 915.91  | 25.75   | 935.24  | 100.99 | 1131.83 | 129.00  |
| AF008914 | Sstr2            | 98350_at    | M       | somatostatin receptor 2                                                                        | signal transduction                                      | 1.71 | 1.60 | 0.94 | 53.62   | 2.70    | 57.30   | 4.95   | 91.86   | 23.09   |
| D86639   | Stac             | 94731_at    | IC      | SH3 and cysteine rich domain                                                                   | intracellular signaling cascade                          | 1.70 | 1.65 | 0.97 | 63.86   | 10.99   | 65.71   | 5.62   | 108.63  | 51.73   |
| AV378535 | Sult1a1          | 162130_r_at |         | sulfotransferase family 1A, phenol-preferring, member 1                                        | steroid metabolism                                       | 1.08 | 1.08 | 1.00 | 11.57   | 0.31    | 11.62   | 0.49   | 12.50   | 0.55    |
| AB026806 | Syt5             | 104269_at   | IC      | synaptotagmin 5                                                                                | synaptic vesicle & secretory granule exocytosis          | 1.43 | 1.39 | 0.97 | 321.25  | 33.69   | 332.33  | 52.61  | 460.96  | 62.90   |
| D17584   | Tac1             | 102726_at   | EC      | tachykinin 1                                                                                   | neuropeptide signal transduction                         | 6.31 | 5.41 | 0.86 | 67.04   | 29.24   | 78.17   | 72.89  | 422.82  | 503.80  |
| X95279   | Thrsp            | 160306_at   | N       | thyroid hormone-responsive protein                                                             | unknown                                                  | 0.46 | 0.59 | 1.29 | 513.72  | 123.46  | 398.27  | 50.31  | 235.53  | 17.30   |
| AI848685 | Timm13a          | 94012_at    | mit     | translocase of inner mitochondrial membrane 13                                                 | protein-mitochondrial targeting                          | 0.86 | 0.85 | 0.99 | 93.83   | 6.43    | 94.52   | 7.33   | 80.45   | 5.68    |
| U38967   | Tmsb4x; Ptmb4    | 96426_at    | CySk    | thymosin beta 4                                                                                | cytoskeleton organization and biogenesis                 | 1.32 | 1.32 | 1.00 | 1297.34 | 183.81  | 1297.78 | 158.37 | 1715.36 | 245.37  |
| AF011543 | Tprc4            | 94100_s_at  | M       | transient receptor potential cation channel C4                                                 | signal transduction                                      | 1.33 | 1.48 | 1.11 | 70.01   | 6.95    | 62.97   | 2.68   | 93.16   | 18.01   |
| AF024637 | Tyrobp           | 100397_at   | M       | TYRO protein tyrosine kinase binding protein                                                   | signal transduction                                      | 2.02 | 1.66 | 0.82 | 98.85   | 11.20   | 120.39  | 9.98   | 200.13  | 82.68   |
| U16818   | Ugt1a6           | 99580_s_at  |         | UDP glucosyltransferase 1 family, polypeptide A6                                               | glucuronate metabolism                                   | 1.51 | 1.41 | 0.93 | 226.02  | 21.80   | 241.90  | 50.29  | 341.84  | 56.80   |
| AF079565 | Usp2             | 92821_at    | IC      | ubiquitin specific protease 2                                                                  | ubiquitin-dependent protein catabolism                   | 0.83 | 0.75 | 0.91 | 191.25  | 12.16   | 210.50  | 10.15  | 158.57  | 16.34   |
| AW012491 | Vkorc1           | 95709_at    | ER      | vitamin K epoxide reductase, subunit 1                                                         | vitamin K biosynthesis                                   | 1.37 | 1.25 | 0.91 | 493.57  | 36.63   | 541.01  | 120.54 | 677.60  | 29.15   |
| AW050287 | Wdr6             | 95643_at    |         | WD repeat domain 6                                                                             | unknown                                                  | 2.05 | 1.46 | 0.71 | 229.19  | 50.79   | 321.28  | 54.95  | 470.13  | 121.63  |
| AF076956 | Ykt6-pending     | 104400_at   |         | prenylated SNARE protein                                                                       | unknown                                                  | 0.56 | 0.65 | 1.15 | 213.81  | 51.17   | 186.01  | 36.60  | 120.12  | 13.88   |
| AI643393 | C80836           | 96391_at    |         | Similar to RIKEN cDNA 9030624G23                                                               |                                                          | 0.81 | 0.81 | 0.99 | 868.95  | 117.02  | 874.14  | 88.03  | 705.91  | 66.01   |
| AI643731 | ESTs             | 95377_at    |         | ESTs                                                                                           |                                                          | 1.36 | 1.52 | 1.12 | 116.40  | 19.90   | 104.23  | 24.21  | 158.60  | 19.94   |
| AA873956 | ESTs             | 102862_at   |         | ESTs                                                                                           |                                                          | 0.63 | 0.68 | 1.07 | 723.57  | 129.95  | 676.71  | 135.09 | 458.87  | 55.29   |
| AV099015 | ESTs             | 161498_at   |         | ESTs                                                                                           |                                                          | 0.62 | 0.67 | 1.08 | 1025.48 | 157.20  | 953.37  | 252.74 | 639.01  | 59.52   |
| AW123823 | ESTs             | 104252_at   |         | ESTs                                                                                           |                                                          | 1.26 | 1.15 | 0.92 | 486.39  | 28.76</ |         |        |         |         |

|          |                 |             |  |                            |      |      |      |        |       |        |        |        |        |
|----------|-----------------|-------------|--|----------------------------|------|------|------|--------|-------|--------|--------|--------|--------|
| AA733594 | 4632428N09RIK   | 160286_at   |  | RIKEN cDNA 4632428N09 gene | 1.57 | 1.59 | 1.01 | 148.49 | 21.39 | 146.40 | 39.09  | 232.48 | 72.49  |
| AI552922 | 4633402N23RIK   | 97370_at    |  | RIKEN cDNA 4633402N23 gene | 0.79 | 0.83 | 1.04 | 471.61 | 24.90 | 452.25 | 25.27  | 374.88 | 35.19  |
| AI464596 | 4930553M18RIK   | 104639_i_at |  | mz66c12.y1 S               | 1.38 | 1.28 | 0.93 | 257.82 | 24.13 | 277.59 | 44.65  | 355.03 | 57.18  |
| AI464596 | **4930553M18RIK | 104640_f_at |  |                            | 1.61 | 1.41 | 0.88 | 237.83 | 33.67 | 271.70 | 58.24  | 382.41 | 105.92 |
| AI842353 | AI842353        | 160971_at   |  | unknown                    | 0.71 | 0.75 | 1.05 | 412.00 | 65.63 | 393.71 | 61.08  | 294.28 | 39.26  |
| AI844839 | 6330442E10RIK   | 103424_at   |  | RIKEN cDNA 6330442E10 gene | 0.66 | 0.68 | 1.04 | 748.09 | 96.08 | 719.81 | 144.11 | 490.57 | 153.23 |
| AI850713 | 8430420C20RIK   | 103916_at   |  | RIKEN cDNA 8430420C20 gene | 1.87 | 1.54 | 0.83 | 112.46 | 20.85 | 136.22 | 40.19  | 210.09 | 29.09  |
| AA592069 | 9130025P16RIK   | 104215_at   |  | RIKEN cDNA 9130025P16 gene | 0.74 | 0.73 | 0.98 | 184.43 | 27.35 | 187.38 | 32.17  | 136.31 | 29.36  |
| AW060889 | BC005662        | 160897_at   |  | cDNA sequence BC005662     | 1.33 | 1.27 | 0.95 | 78.57  | 5.28  | 82.57  | 6.11   | 104.74 | 5.99   |
| AI852661 | D430019H16RIK   | 95397_at    |  | RIKEN cDNA D430019H16 gene | 2.26 | 1.88 | 0.83 | 191.06 | 20.05 | 229.02 | 31.91  | 431.21 | 97.09  |

Class III: Genes that are uniquely expressed in LMN (73)

| Genbank  | Common          | Probeset    | location | Description                                                 | Function                                         | Fold changes* |         |         | Average Signal Intensities & Standard Deviations |        |         |        |         |        |
|----------|-----------------|-------------|----------|-------------------------------------------------------------|--------------------------------------------------|---------------|---------|---------|--------------------------------------------------|--------|---------|--------|---------|--------|
|          |                 |             |          |                                                             |                                                  | IML/LMN       | IML/MMN | LMN/MMN | Average                                          | SD     | Average | SD     | Average | SD     |
| AW125884 | Acas2l          | 160921_at   | mit      | acetyl-Coenzyme A synthetase 2                              | metabolism                                       | 1.50          | 1.01    | 0.67    | 150.65                                           | 35.63  | 223.41  | 58.77  | 266.91  | 55.46  |
| AJ130977 | Arlh1           | 95563_at    |          | ariadne ubiquitin-conjugating enzyme E2 binding protein     | ubiquitin-dependent protein catabolism           | 0.82          | 0.98    | 1.18    | 204.89                                           | 11.21  | 173.08  | 9.27   | 168.91  | 10.74  |
| AW121246 | Atp6v1g1        | 96281_at    | lys      | ATPase, H+ transporting, V1 subunit G isoform 1             | proton pump                                      | 0.79          | 0.94    | 1.19    | 3257.24                                          | 321.78 | 2729.22 | 329.60 | 2558.92 | 214.25 |
| AV356510 | AW491445        | 161578_r_at | mit      | expressed sequence AW491445                                 | transport                                        | 0.86          | 1.04    | 1.21    | 116.13                                           | 11.12  | 95.99   | 5.66   | 99.67   | 9.25   |
| AI102186 | Bad             | 161500_u_at | mit      | Bcl-associated death promoter                               | integrates glucose metabolism & apoptosis        | 0.85          | 1.01    | 1.19    | 341.73                                           | 27.63  | 286.48  | 19.95  | 290.40  | 22.95  |
| AA863928 | Baz1b           | 103081_at   | N        | bromodomain adjacent to zinc finger domain, 1B              | transcription regulation                         | 1.23          | 1.08    | 0.87    | 858.10                                           | 32.52  | 983.51  | 58.88  | 1059.08 | 87.84  |
| L18888   | Canx            | 94886_at    | ER       | calnexin                                                    | ER chaperone                                     | 0.67          | 1.01    | 1.15    | 667.31                                           | 61.50  | 580.77  | 34.46  | 584.94  | 16.60  |
| Y11896   | Chic1           | 98316_at    | G        | cysteine-rich hydrophobic domain 1                          | GoI to plasma membrane transport                 | 0.80          | 0.92    | 1.16    | 98.19                                            | 11.29  | 84.87   | 3.52   | 78.33   | 1.25   |
| AI840975 | Ctic            | 160252_at   | IC       | clathrin, heavy polypeptide (Hc)                            | coat protein for intracellular transport         | 0.85          | 1.00    | 1.17    | 4798.22                                          | 170.52 | 4097.58 | 450.09 | 4077.26 | 227.01 |
| M13018   | Crip            | 94061_at    |          | cysteine rich intestinal protein                            | unknown                                          | 1.32          | 1.00    | 0.75    | 76.93                                            | 9.45   | 102.25  | 11.91  | 101.84  | 16.21  |
| AV218205 | Cst3            | 161522_i_at | EC       | cystatin C                                                  | cysteine protease inhibitor activity             | 1.59          | 1.18    | 0.74    | 327.66                                           | 33.81  | 440.51  | 20.46  | 520.65  | 149.06 |
| U10098   | Cst3            | 99586_at    |          |                                                             |                                                  | 1.49          | 1.15    | 0.77    | 2499.38                                          | 371.94 | 3242.08 | 388.66 | 3733.85 | 394.84 |
| Y14004   | Cte1            | 103581_at   | IC       | cytosolic acyl-CoA thioesterase 1                           | lipid metabolism                                 | 1.17          | 1.01    | 0.86    | 117.98                                           | 11.58  | 136.73  | 4.83   | 137.81  | 13.14  |
| AW049573 | D5Bwg0860e      | 161062_r_at |          | rap2 interacting protein x                                  | signal transduction                              | 0.81          | 0.97    | 1.21    | 2776.58                                          | 194.06 | 2304.00 | 274.86 | 2239.34 | 144.82 |
| AW047343 | Dbp             | 160841_at   | N        | D site albumin promoter binding protein                     | transcription regulator, circadian rhythm        | 1.42          | 1.08    | 0.76    | 113.29                                           | 8.67   | 149.64  | 18.73  | 161.23  | 16.84  |
| X77952   | Eng             | 100134_at   | M        | endoglin                                                    | constituent of TGF-beta signaling complex        | 1.56          | 1.07    | 0.69    | 543.31                                           | 88.88  | 789.78  | 112.17 | 847.13  | 184.77 |
| AF079765 | Epc1            | 103263_at   | N        | enhancer of polycomb homolog 1 (Drosophila)                 | transcription factor                             | 1.28          | 1.08    | 0.85    | 438.32                                           | 37.68  | 518.54  | 64.23  | 559.03  | 45.15  |
| L11333   | Es31            | 99941_at    | ER,EC    | esterase 31                                                 | carboxylesterase activity                        | 0.89          | 1.01    | 1.14    | 65.86                                            | 2.86   | 58.02   | 4.23   | 58.42   | 3.10   |
| AV251191 | Foxc2           | 162016_f_at | N        | forkhead box C2                                             | transcription factor                             | 1.56          | 1.02    | 0.65    | 82.74                                            | 13.21  | 126.63  | 31.06  | 129.28  | 19.34  |
| AF091390 | Fxyd1; PLM; PML | 93040_at    | M        | FXFYD domain-containing ion transport regulator 1           | accessory protein of Na,K-ATPase                 | 1.50          | 1.20    | 0.80    | 546.78                                           | 49.50  | 682.24  | 90.24  | 820.28  | 114.16 |
| AI046826 | Gab1            | 160714_at   | IC       | growth factor receptor bound protein 2-associated protein 1 | signal transduction                              | 1.65          | 1.09    | 0.66    | 313.46                                           | 50.75  | 473.00  | 56.21  | 516.46  | 81.88  |
| X65128   | Gas1            | 94813_at    | M        | growth arrest specific 1                                    | growth regulation                                | 2.01          | 1.25    | 0.62    | 311.55                                           | 63.70  | 503.46  | 127.66 | 627.42  | 214.01 |
| AV062425 | Gast            | 161639_f_at | EC       | gastrin                                                     | peptide hormone                                  | 0.78          | 1.03    | 1.32    | 44.90                                            | 3.67   | 34.05   | 3.55   | 35.08   | 3.28   |
| AV381947 | Glul            | 161628_r_at | mit      | glutamate-aminonia ligase                                   | glutamine synthetase                             | 0.90          | 1.01    | 1.12    | 721.82                                           | 45.09  | 643.90  | 32.13  | 650.13  | 41.95  |
| D29802   | Gnb2-rs1        | 99340_at    | IC       | guanine nucleotide binding protein, beta 2                  | signal transduction                              | 1.37          | 1.05    | 0.77    | 995.00                                           | 136.22 | 1297.15 | 123.32 | 1359.88 | 80.60  |
| J03952   | Gstm1           | 83543_f_at  |          | glutathione S-transferase, mu 1                             | metabolism                                       | 1.18          | 0.98    | 0.83    | 3052.33                                          | 252.33 | 3684.24 | 406.36 | 3614.40 | 245.60 |
| AI841270 | Gstm1           | 102094_f_at |          |                                                             |                                                  | 1.31          | 1.00    | 0.76    | 1478.87                                          | 244.54 | 1933.58 | 94.86  | 1935.07 | 209.72 |
| U43715   | Hand2           | 99914_at    | N        | heart and neural crest derivatives expressed transcript 2   | transcription factor                             | 0.92          | 1.05    | 1.14    | 44.20                                            | 1.91   | 38.68   | 1.42   | 40.50   | 2.14   |
| Y09517   | Hsd17b2         | 101891_at   | M        | hydroxysteroid (17-beta) dehydrogenase 2                    | steroid biosynthesis                             | 0.58          | 0.78    | 1.35    | 113.46                                           | 26.60  | 83.96   | 14.98  | 65.67   | 7.05   |
| M58567   | Hsd3b1          | 103072_at   | ER, mit  | hydroxysteroid dehydrogenase-1, delta-5--3-beta             | steroid hormone biosynthesis                     | 0.89          | 1.01    | 1.13    | 86.63                                            | 3.59   | 76.60   | 2.02   | 76.99   | 1.64   |
| AI844520 | Ilf30           | 97444_at    | EC, lys  | interferon gamma inducible protein 30                       | antigen processing for MHC II presentation       | 1.39          | 1.12    | 0.80    | 38.16                                            | 3.10   | 47.47   | 8.97   | 52.98   | 3.13   |
| AB012886 | Igfbp7          | 160527_at   | EC       | insulin-like growth factor binding protein 7                | regulation of growth & metabolism                | 1.15          | 0.99    | 0.86    | 119.44                                           | 8.53   | 138.68  | 13.30  | 137.00  | 5.50   |
| AW047808 | Imnt            | 100589_at   | mit      | inner membrane protein, mitochondrial                       |                                                  | 0.82          | 0.92    | 1.12    | 135.55                                           | 3.72   | 121.17  | 9.22   | 111.50  | 3.34   |
| AI047617 | Itn             | 104522_at   | IC       | intersectin (SH3 domain protein 1A)                         | endocytic adaptor protein                        | 1.22          | 1.04    | 0.85    | 714.68                                           | 48.56  | 839.91  | 28.82  | 873.75  | 67.39  |
| AA986344 | Kcnj1           | 103973_at   | M        | K inwardly-rectifying channel, subfamily J, member 1        | potassium channel                                | 0.88          | 1.05    | 1.19    | 36.46                                            | 2.41   | 30.67   | 2.04   | 32.11   | 1.39   |
| X64070   | M6pr            | 92846_at    | lys      | mannose-6-phosphate receptor, catlyon dependent 1           | intracellular protein transport                  | 0.80          | 0.98    | 1.23    | 36.17                                            | 2.86   | 29.44   | 2.41   | 28.84   | 2.83   |
| AJ005532 | Magea8          | 103291_at   |          | melanoma antigen family A, 8                                | unknown                                          | 0.84          | 0.95    | 1.13    | 178.84                                           | 11.82  | 158.17  | 9.45   | 149.56  | 11.03  |
| AV345275 | Main2           | 161776_at   | EC       | matrin 2                                                    | non-collagenous extracellular matrix protein     | 0.90          | 1.02    | 1.13    | 95.50                                            | 5.40   | 84.21   | 5.47   | 86.09   | 4.85   |
| AF079366 | Mpp3            | 103247_at   | M        | MAGUK p55 subfamily member 3                                | signal transduction                              | 1.36          | 1.05    | 0.78    | 186.29                                           | 27.51  | 239.94  | 31.87  | 252.47  | 32.42  |
| AF073997 | Mtmr1           | 103264_at   | IC, M    | myotubularin related protein 3                              | phosphatase, signal transduction                 | 0.83          | 0.94    | 1.14    | 108.30                                           | 7.23   | 94.97   | 6.37   | 89.68   | 6.11   |
| Z11886   | Notch1          | 97497_at    | M        | Notch gene homolog 1 (Drosophila)                           | transcription factor, signal transduction        | 1.47          | 1.10    | 0.75    | 253.47                                           | 22.58  | 338.22  | 51.77  | 372.38  | 44.20  |
| AB008180 | Pcdha13         | 101771_r_at | M        | protocadherin alpha 13                                      | cell adhesion                                    | 0.87          | 0.98    | 1.12    | 4045.65                                          | 159.81 | 3607.67 | 280.98 | 3518.39 | 184.09 |
| AV149007 | Pdlim1          | 161348_r_at | IC       | PDZ and LIM domain 1 (efflin)                               | adaptor, signal transduction, CySk interactions  | 0.85          | 0.96    | 1.14    | 454.49                                           | 32.25  | 399.01  | 35.08  | 384.86  | 23.35  |
| AV318045 | Pvr13           | 161415_r_at | M        | poliovirus receptor-related 3                               | cell adhesion                                    | 0.75          | 0.89    | 1.18    | 33.90                                            | 4.41   | 28.67   | 2.22   | 25.39   | 0.56   |
| U73199   | Rgnef           | 92710_at    |          | Rho-guanine nucleotide exchange factor                      | signal transduction                              | 1.24          | 1.03    | 0.83    | 170.92                                           | 17.36  | 205.65  | 21.28  | 211.56  | 16.08  |
| X15962   | Rps12           | 102126_at   | IC       | ribosomal protein S12                                       | protein biosynthesis                             | 1.76          | 1.30    | 0.74    | 1439.57                                          | 215.79 | 1949.57 | 393.91 | 2530.88 | 368.21 |
| AF100956 | Rps18           | 98333_at    | IC       | ribosomal protein subunit S18                               | protein biosynthesis                             | 1.47          | 1.10    | 0.75    | 920.88                                           | 74.51  | 1233.85 | 270.76 | 1352.71 | 191.64 |
| AI836446 | Rrbp1           | 92850_at    | IC       | ribosome binding protein 1                                  | protein biosynthesis                             | 1.57          | 1.21    | 0.78    | 198.44                                           | 17.01  | 255.85  | 47.83  | 310.62  | 32.27  |
| AI840996 | Sepr            | 160275_at   |          | selenoprotein R                                             | methionine sulfoxide reductase                   | 0.66          | 0.87    | 1.31    | 686.54                                           | 14.69  | 523.68  | 70.10  | 456.09  | 83.40  |
| AB030836 | Siat7e          | 92403_at    | G        | sialyltransferase 7E                                        | protein amino acid glycosylation                 | 1.28          | 0.92    | 0.72    | 53.44                                            | 5.96   | 74.35   | 5.57   | 68.46   | 10.05  |
| U10531   | Skil; sno; Skir | 94752_s_at  | N        | SNO proto-oncogene                                          | cell growth and maintenance                      | 0.88          | 1.00    | 1.13    | 82.17                                            | 2.75   | 72.64   | 2.88   | 72.61   | 5.42   |
| X81633   | Spag5           | 92412_s_at  | N        | sperm associated antigen 5                                  | microtubule (mitotic spindle) associated protein | 0.86          | 1.00    | 1.16    | 25.61                                            | 3.24   | 22.06   | 1.29   | 22.11   | 1.18   |
| U10355   | sy4             | 160190_at   | IC       | synaptotagmin 4                                             | vesicular trafficking and exocytosis             | 0.56          | 1.04    | 1.87    | 55.29                                            | 18.40  | 29.61   | 6.14   | 30.86   | 10.34  |
| AV220470 | Tbx2            | 161146_r_at | N        | T-box 2                                                     | transcription factor                             | 0.76          | 0.99    | 1.30    | 47.91                                            | 3.96   | 36.90   | 2.13   | 36.59   | 1.78   |
| D38410   | Tif3            | 100106_at   | EC       | trefoil factor 3, intestinal                                | peptide signal transduction                      | 0.91          | 1.00    | 1.09    | 295.52                                           | 15.01  | 270.28  | 11.28  | 269.31  | 7.76   |
| L34169   | Thpo            | 97734_at    | EC       | thrombopoietin                                              | hormone/cytokine, cell growth & maintenance      | 0.92          | 0.99    | 1.08    | 97.41                                            | 5.75   | 90.56   | 2.84   | 89.24   | 1.61   |
| AW210080 | Ube2n           | 96959_at    | IC       | ubiquitin-conjugating enzyme E2N                            | ubiquitin-dependent protein catabolism           | 0.77          | 0.97    | 1.27    | 800.92                                           | 69.61  | 629.18  | 123.41 | 613.02  | 38.55  |
| AI850362 | Uck2-pending    | 94367_at    |          | uridine-cytidine kinase 2                                   | carbohydrate metabolism                          | 0.70          | 0.95    | 1.36    | 225.47                                           | 27.69  | 166.13  | 18.50  | 157.02  | 33.71  |
| AF035643 | Vamp5           | 92496_at    | M        | vesicle-associated membrane protein 5                       | vesicular trafficking & transport, secretion     | 1.44          | 1.12    | 0.77    | 222.48                                           | 24.34  | 287.19  | 51.93  | 320.96  | 40.05  |
| AV157222 | Vapa            | 161515_r_at | IC       | vesicle-associated membrane protein A                       | vesicular trafficking & transport                | 0.81          | 0.97    | 1.19    | 20.16                                            | 1.91   | 16.95   | 2.38   | 16.37   | 0.46   |
| X60671   | Vil2            | 100084_at   | CySk     | villin 2                                                    | actin filament-plasma membrane linker            | 1.43          | 1.05    |         |                                                  |        |         |        |         |        |

A1156978 D12Erd7e 160957\_at DNA segment, Chr 12, ERATO Doi 7, expressed 1.23 1.01 0.82 107.27 6.58 130.11 11.55 131.99 16.98

**Class IV: Genes that are uniquely expressed in MMN (4)**

| Genbank  | Common | Probeset   | location | Description                    | Function                   | Fold changes* |         |         | Average Signal Intensities & Standard Deviations |       |        |        |        |       |
|----------|--------|------------|----------|--------------------------------|----------------------------|---------------|---------|---------|--------------------------------------------------|-------|--------|--------|--------|-------|
|          |        |            |          |                                |                            | IML/LMN       | IML/MMN | LMN/MMN | LMN                                              | SD    | MMN    | SD     | IML    | SD    |
| X61448   | Cbln1  | 92932_at   | EC       | cerebellin 1 precursor protein | neuropeptide               | 0.85          | 0.44    | 0.52    | 464.56                                           | 76.34 | 895.38 | 258.83 | 395.70 | 37.93 |
| AF059735 | Ctbp2  | 92554_at   | N        | C-terminal binding protein 2   | transcriptional regulation | 0.86          | 0.71    | 0.83    | 192.13                                           | 22.86 | 231.96 | 19.57  | 165.07 | 8.79  |
| D26186   | Srms   | 98794_at   |          | src-related kinase             | signal transduction        | 1.00          | 1.05    | 1.05    | 34.10                                            | 0.68  | 32.35  | 0.73   | 34.06  | 0.74  |
| AF011420 | V2r10  | 94722_f_at | M        | vomeronal 2, receptor, 10      | signal transduction        | 0.96          | 1.11    | 1.16    | 124.12                                           | 2.60  | 107.44 | 7.69   | 119.32 | 4.76  |

**Class V: Genes that are differentially expressed between LMN and IML (472)**

| Genbank  | Common        | Probeset    | location  | Description                                        | Function                                               | Fold changes* |         |         | Average Signal Intensities & Standard Deviations |        |         |         |         |         |
|----------|---------------|-------------|-----------|----------------------------------------------------|--------------------------------------------------------|---------------|---------|---------|--------------------------------------------------|--------|---------|---------|---------|---------|
|          |               |             |           |                                                    |                                                        | IML/LMN       | IML/MMN | LMN/MMN | LMN                                              | SD     | MMN     | SD      | IML     | SD      |
| AA967624 | Abcc8         | 103274_at   |           | sulfonyleurea receptor                             | component of potassium ATP channel                     | 0.89          | 0.92    | 1.03    | 132.32                                           | 6.85   | 128.74  | 8.58    | 118.15  | 4.61    |
| M12347   | Acta1; Acts   | 100381_at   | CySk      | skeletal alpha-actin gene                          | structural constituent of cytoskeleton                 | 1.42          | 1.29    | 0.91    | 54.25                                            | 4.98   | 59.67   | 15.13   | 76.91   | 16.69   |
| AA791742 | Actr2         | 104168_at   | CySk      | ARP2 actin-related protein 2 homolog (yeast)       | structural constituent of cytoskeleton                 | 0.80          | 0.89    | 1.12    | 111.20                                           | 14.32  | 99.26   | 8.91    | 88.66   | 11.84   |
| AF006196 | Adam15        | 103588_at   | M, EC     | a disintegrin and metalloproteinase domain 15      | membrane surface & ECM proteolysis, cell adhesion      | 0.83          | 0.92    | 1.10    | 179.21                                           | 20.29  | 162.53  | 9.92    | 149.58  | 12.35   |
| AA036065 | Adcy2         | 103241_at   | M         | adenylate cyclase 2                                | signal transduction                                    | 1.25          | 1.17    | 0.94    | 1090.99                                          | 78.54  | 1165.27 | 194.09  | 1364.39 | 183.56  |
| M93422   | Adcy6         | 102321_at   | M         | adenylate cyclase 6                                | signal transduction                                    | 1.19          | 1.03    | 0.87    | 215.72                                           | 18.21  | 249.33  | 32.09   | 256.74  | 24.24   |
| Z50190   | Adcy9         | 92527_at    | M         | adenylate cyclase 9                                | signal transduction                                    | 0.73          | 0.84    | 1.16    | 132.05                                           | 15.86  | 114.05  | 16.92   | 95.88   | 9.24    |
| AV355809 | Admr          | 162448_f_at | M         | adrenomedullin receptor                            | neuropeptide signal transduction                       | 1.31          | 0.99    | 0.75    | 21.52                                            | 2.02   | 28.67   | 6.36    | 28.24   | 2.72    |
| AJ007780 | Adprt2        | 100903_at   | N         | poly(ADP-ribose) polymerase-2                      | DNA repair                                             | 1.50          | 1.31    | 0.88    | 206.87                                           | 17.51  | 235.96  | 31.96   | 309.38  | 91.61   |
| AB016592 | Agr2          | 101075_f_at | EC        | anterior gradient 2 (Xenopus laevis)               | survival factor                                        | 0.84          | 0.97    | 1.15    | 56.02                                            | 6.39   | 48.69   | 3.52    | 47.26   | 3.92    |
| AF045887 | Agt; Aogen    | 101887_at   | EC        | angiotensinogen                                    | local & circulating hormone                            | 1.65          | 1.16    | 0.70    | 346.27                                           | 56.61  | 495.47  | 100.82  | 572.68  | 210.40  |
| AW020203 | Ak3l          | 92492_at    | mit       | adenylate kinase 3 alpha-like                      | ATP metabolism                                         | 0.83          | 0.91    | 1.09    | 30.43                                            | 2.10   | 27.90   | 1.92    | 25.30   | 2.95    |
| AW050387 | Aldh1a3       | 98372_at    | IC        | retinaldehyde dehydrogenase type 3                 | retinoic acid production                               | 1.21          | 1.08    | 0.89    | 29.68                                            | 2.44   | 33.32   | 1.10    | 36.00   | 3.97    |
| U89906   | Amacr         | 95588_at    | mit       | alpha-methylacyl-CoA racemase                      | metabolism                                             | 0.89          | 0.94    | 1.05    | 129.68                                           | 9.45   | 123.00  | 9.08    | 115.16  | 5.54    |
| U73478   | Anp32a        | 93372_at    | N         | acidic nuclear phosphoprotein 32, family member A  | Regulation of histone acetylation & transcription      | 0.80          | 0.86    | 1.07    | 75.28                                            | 4.45   | 70.33   | 5.34    | 60.39   | 8.75    |
| AI842771 | Anp32b        | 96891_at    | N         | acidic nuclear phosphoprotein 32 family, member B  | cell cycle progression                                 | 1.54          | 1.35    | 0.87    | 422.53                                           | 22.17  | 484.39  | 97.56   | 651.89  | 153.96  |
| AV003419 | Anxa1; lpc1   | 161703_f_at | EC, M, IC | annexin A 1, lipocortin 1                          | Ca- & phospholipid-binding protein, multiple functions | 5.95          | 2.37    | 0.40    | 90.78                                            | 49.43  | 227.72  | 137.75  | 540.17  | 661.66  |
| M69260   | Anxa1; Lpc1   | 93038_f_at  |           |                                                    |                                                        | 5.84          | 2.15    | 0.37    | 83.07                                            | 56.53  | 225.95  | 146.54  | 485.07  | 551.50  |
| X13460   | Anxa6         | 94304_at    | EC, M, IC | annexin A6                                         | Ca- & phospholipid-binding protein, multiple functions | 0.60          | 0.67    | 1.10    | 1393.51                                          | 314.44 | 1261.77 | 462.23  | 839.86  | 233.55  |
| U22262   | Apobec1       | 98398_s_at  | IC        | apolipoprotein B editing complex 1                 | mRNA editing                                           | 1.29          | 1.19    | 0.92    | 57.68                                            | 2.81   | 62.61   | 6.52    | 74.55   | 14.86   |
| D00466   | Apoe          | 95356_at    | EC        | apolipoprotein,                                    | lipid transport, lipoprotein metabolism                | 2.13          | 1.35    | 0.63    | 2898.04                                          | 825.71 | 4594.10 | 1631.17 | 6182.09 | 1664.78 |
| M13071   | Araf; A-Raf   | 102286_at   | IC, mit   | A-raf peptide                                      | signal transduction                                    | 1.22          | 1.09    | 0.90    | 134.29                                           | 15.40  | 149.88  | 21.63   | 163.63  | 10.85   |
| AW212775 | Arpc1b        | 96357_at    | Cysk      | actin related protein 2/3 complex, subunit 1B      | cytoskeletal organization                              | 1.24          | 1.16    | 0.93    | 328.40                                           | 33.43  | 351.79  | 49.38   | 407.25  | 36.92   |
| U48797   | Astn1         | 92702_at    | M         | astroctatin 1                                      | cell adhesion                                          | 1.23          | 1.10    | 0.89    | 801.13                                           | 71.36  | 897.52  | 118.66  | 986.26  | 107.57  |
| AB012276 | Atf5          | 103006_at   | N         | activating transcription factor 1 polypeptide      | regulates transcription                                | 1.34          | 1.16    | 0.87    | 87.24                                            | 5.63   | 100.61  | 6.82    | 116.95  | 17.50   |
| AV348528 | Atp1b1        | 161467_f_at | M         | ATPase, Na+/K+ transporting, beta 5                | Na-K exchange                                          | 0.76          | 0.86    | 1.13    | 701.21                                           | 21.36  | 622.20  | 10.81   | 535.47  | 88.45   |
| U29530   | Atp5f1        | 96898_at    | mit       | ATP synthase, F0 complex                           | ATP synthesis                                          | 0.88          | 0.90    | 1.02    | 106.03                                           | 3.85   | 104.22  | 9.40    | 93.83   | 6.54    |
| U13840   | Atp6v0d1      | 92603_at    | lys       | ATPase, H+ transporting, V0 subunit D isoform 1    | proton pump                                            | 0.78          | 0.82    | 1.06    | 1578.13                                          | 80.68  | 1494.12 | 114.80  | 1228.13 | 260.87  |
| AI843269 | Atp6v0e       | 94301_at    | lys       | ATPase, H+ transporting, V0 subunit                | proton pump                                            | 1.22          | 1.01    | 0.83    | 233.35                                           | 30.72  | 280.62  | 38.14   | 283.82  | 19.38   |
| AV303935 | AW146116      | 162226_r_at | M         | SM-11044 binding protein                           | channel, small molecule transporter or receptor        | 0.80          | 0.93    | 1.15    | 147.49                                           | 21.75  | 128.21  | 11.07   | 118.60  | 6.31    |
| X63535   | Axl           | 99136_at    | M         | AXL receptor tyrosine kinase                       | signal transduction                                    | 1.17          | 1.09    | 0.93    | 96.14                                            | 4.43   | 103.32  | 10.37   | 112.89  | 10.22   |
| AW124185 | B230114J08Rik | 96340_at    |           | unknown                                            | unknown                                                | 0.84          | 0.87    | 1.03    | 2525.25                                          | 343.32 | 2452.01 | 167.41  | 2127.54 | 174.02  |
| AI843420 | Basg3         | 96167_at    |           | Bcl2-associated atrogenase 3                       | regulation of apoptosis                                | 0.52          | 0.79    | 1.54    | 679.96                                           | 236.62 | 442.53  | 74.35   | 351.47  | 157.80  |
| AW124113 | Basp1         | 95673_s_at  | N, M      | brain abundant, membrane attached signal protein 1 | transcriptional corepressor, signal transduction       | 1.62          | 1.33    | 0.83    | 1271.05                                          | 333.61 | 1539.62 | 568.83  | 2053.11 | 420.89  |
| U41465   | Bcl6          | 103015_at   | EC        | B-cell leukemia/lymphoma 6                         | transcription factor                                   | 0.35          | 0.47    | 1.32    | 603.42                                           | 281.81 | 458.51  | 278.94  | 213.26  | 44.20   |
| X53928   | Bgn           | 96049_at    | EC        | biglycan                                           | glycoprotein, binds collagen                           | 2.82          | 1.60    | 0.57    | 403.42                                           | 167.52 | 711.40  | 43.96   | 1136.95 | 646.38  |
| U76371   | Bop           | 101903_at   | IC, N     | CD8beta epsilon strand                             | transcription factor                                   | 0.88          | 0.92    | 1.04    | 89.73                                            | 5.97   | 85.99   | 5.75    | 79.25   | 3.79    |
| Z16410   | Btg1          | 93104_at    | IC        | B-cell translocation gene 1                        | antiproliferative                                      | 1.52          | 1.27    | 0.83    | 102.84                                           | 21.00  | 123.52  | 38.34   | 156.43  | 17.41   |
| D83745   | Btg3          | 96146_at    | IC        | B-cell translocation gene 3                        | antiproliferative                                      | 2.12          | 1.56    | 0.73    | 67.09                                            | 25.77  | 91.57   | 30.07   | 142.51  | 19.19   |
| AF007802 | Bystl         | 96644_at    | EC        | bystin-like                                        | cell adhesion                                          | 0.87          | 0.94    | 1.08    | 21.60                                            | 1.88   | 19.92   | 1.72    | 18.82   | 0.80    |
| X66295   | C1qg          | 92223_at    | IC        | complement component 1q gamma                      | complement activity                                    | 1.28          | 1.23    | 0.96    | 200.32                                           | 26.15  | 208.95  | 33.14   | 257.01  | 28.74   |
| AI132585 | C1r           | 95415_f_at  | EC        | complement component 1, r subcomponent             | complement activity                                    | 1.43          | 1.23    | 0.86    | 107.38                                           | 10.42  | 125.36  | 30.94   | 153.62  | 26.18   |
| X06454   | C4            | 103033_at   | EC        | complement component 4 (within H-2S)               | complement activity                                    | 1.89          | 1.47    | 0.78    | 120.05                                           | 32.18  | 153.87  | 57.37   | 226.44  | 55.29   |
| X73985   | Calb2         | 95036_at    | IC        | calbindin 2                                        | 'fast Ca(2+)-buffer                                    | 0.56          | 0.63    | 1.12    | 1720.84                                          | 570.00 | 1538.51 | 521.17  | 970.53  | 268.32  |
| AI847646 | Calml4        | 96203_at    | IC        | calmodulin-like 4                                  | signal transduction                                    | 1.47          | 1.04    | 0.77    | 114.20                                           | 6.77   | 161.47  | 52.54   | 168.14  | 27.98   |
| X54511   | Capg          | 160106_at   | CySk      | capping protein (actin filament), gelsolin-like    | cytoskeletal organization                              | 1.24          | 1.14    | 0.92    | 105.82                                           | 9.38   | 114.51  | 18.60   | 130.96  | 12.90   |
| AI847631 | Carhsp1       | 96884_at    |           | calcium regulated heat stable protein 1            | transcriptional regulation                             | 1.23          | 1.16    | 0.94    | 280.00                                           | 19.50  | 297.50  | 39.96   | 345.19  | 34.20   |
| D28492   | Casp2         | 99049_at    | IC, N     | caspace 2                                          | proteolysis and peptidolysis                           | 1.14          | 1.08    | 0.95    | 228.05                                           | 6.12   | 240.82  | 17.27   | 260.80  | 16.71   |
| Y13087   | Casp6         | 94458_at    |           | caspace 6                                          | proteolysis and peptidolysis                           | 1.30          | 1.12    | 0.86    | 35.63                                            | 2.94   | 41.49   | 8.04    | 46.47   | 3.75    |
| D86353   | Casp7         | 98498_at    |           | caspace 7                                          | proteolysis and peptidolysis                           | 1.21          | 1.05    | 0.87    | 110.38                                           | 6.39   | 127.40  | 12.18   | 133.17  | 12.16   |
| AB026997 | Cast          | 95062_at    |           | calpastatin                                        | protease inhibitor                                     | 0.52          | 0.71    | 1.37    | 250.90                                           | 73.57  | 183.28  | 49.34   | 131.01  | 26.74   |
| L03279   | Cbfb          | 93547_at    | N         | core binding factor beta                           | transcriptional regulator                              | 1.71          | 1.43    | 0.84    | 2358.21                                          | 357.11 | 2819.27 | 318.59  | 4042.24 | 1467.87 |
| AI852086 | Cbx5          | 95614_at    | N         | chromobox homolog 5 (Drosophila HPIa)              | chromatin assembly/disassembly                         | 1.15          | 1.09    | 0.95    | 119.62                                           | 6.61   | 126.45  | 9.83    | 137.73  | 4.21    |
| M58004   | Col6          | 92849_at    | EC        | chemokine (C-C motif) ligand 6                     | signal transduction                                    | 1.31          | 1.21    | 0.92    | 89.51                                            | 15.07  | 96.99   | 8.03    | 117.22  | 23.28   |
| AV174603 | Ccs           | 162351_f_at |           | copper chaperone for superoxide dismutase          | incorporation of copper into SOD1                      | 1.12          | 1.07    | 0.95    | 64.70                                            | 3.58   | 67.77   | 4.06    | 72.73   | 1.69    |
| AI847784 | Cd34          | 160358_at   | M         | CD34 antigen                                       | cell adhesion                                          | 1.35          | 1.19    | 0.88    | 109.23                                           | 10.75  | 123.55  | 22.53   | 147.00  | 26.54   |
| X68273   | Cd68          | 103016_s_at | M, Lys    | CD68 antigen                                       | scavenger receptor                                     | 1.25          | 1.12    | 0.90    | 90.66                                            | 5.54   | 100.90  | 12.54   | 113.21  | 19.00   |
| L08115   | Cd9           | 95661_at    | M         | CD9 antigen                                        | cell adhesion                                          | 2.16          | 1.70    | 0.79    | 474.03                                           | 132.60 | 601.11  | 246.58  | 1021.92 | 559.12  |
| AI844806 | Cdc42ep4      | 94036_at    | IC, CySk  | CDC42 effector protein (Rho GTPase binding) 4      | signal transduction                                    | 1.36          | 1.20    | 0.88    | 209.62                                           | 17.05  | 238.17  | 53.92   | 286.05  | 36.02   |
| AI853217 | Cdh5          | 104083_at   | M         | cadherin 5                                         | cell adhesion                                          | 1.56          | 1.15    | 0.74    | 59.33                                            | 4.03   | 80.14   | 21.41   | 92.47   | 16.02   |
| M29009   | Cfh           | 94743_f_at  | EC        | complement component factor h                      | complement activity                                    | 2.18          | 1.25    | 0.57    | 61.16                                            | 23.73  | 106.38  | 67.00   | 133.15  | 46.79   |
| M29008   | Cfh1          | 92291_f_at  | EC        | complement component factor h-like 1               | complement activity                                    | 1.71          | 1.28    | 0.75    | 92.37                                            | 25.95  | 123.78  | 46.98   | 158.01  | 34.68   |
| AI838398 | Cic           | 96725_at    |           | capicua homolog (Drosophila)                       | transcription factor                                   | 0.88          | 0.96    | 1.10    | 290.90                                           | 16.99  | 265.01  | 16.00   | 255.27  | 17.59   |
| AF109905 | Clic1         | 95654_at    | M, IC     | chloride intracellular channel 1                   | state-dependent voltage-gated chloride channel         | 2.11          | 1.36    | 0.64    | 68.85                                            | 24.23  | 106.94  | 36.55   | 145.49  | 47.94   |
| U30292   | Col13a1       | 102262_r_at | EC        | procollagen, type XIII, alpha 1                    | structural constituent of ECM                          |               |         |         |                                                  |        |         |         |         |         |



|          |                   |             |           |                                                        |                                                       |      |      |      |         |         |         |         |         |        |
|----------|-------------------|-------------|-----------|--------------------------------------------------------|-------------------------------------------------------|------|------|------|---------|---------|---------|---------|---------|--------|
| A1843212 | Copz2             | 104143_at   | IC        | coatamer protein complex, subunit zeta 2               | intracellular protein transport                       | 1.30 | 1.04 | 0.80 | 159.79  | 20.74   | 199.69  | 44.31   | 207.98  | 15.03  |
| U49430   | Cp                | 92851_at    | EC        | ceruloplasmin                                          | ferroxidase regulating iron efflux                    | 2.39 | 1.26 | 0.53 | 53.84   | 19.60   | 102.14  | 55.50   | 128.50  | 19.25  |
| AF017175 | Cpt1a             | 93320_at    | mit       | carnitine palmitoyltransferase 1, liver                | fatty acid metabolism                                 | 0.62 | 0.78 | 1.26 | 1262.84 | 353.79  | 1003.48 | 253.56  | 777.17  | 140.94 |
| AF017639 | Cpxm2             | 102226_at   | EC        | carboxypeptidase X 2 (M14 family)                      | proteolysis and peptidolysis; cell adhesion           | 2.01 | 1.43 | 0.71 | 145.28  | 20.02   | 204.70  | 65.60   | 292.39  | 70.91  |
| AF084524 | Creg              | 160502_at   | N, IC     | cellular repressor of E1A-stimulated genes             | transcription factor                                  | 0.80 | 0.90 | 1.13 | 235.88  | 27.29   | 208.22  | 11.92   | 188.25  | 14.07  |
| AJ006469 | Crtap             | 103817_at   | EC        | cartilage associated protein                           | constituent of the ECM                                | 1.43 | 1.03 | 0.72 | 244.42  | 36.71   | 341.42  | 90.02   | 350.66  | 53.29  |
| D14485   | Csda              | 95755_at    | N         | cold shock domain protein A                            | transcription factor                                  | 1.32 | 1.20 | 0.91 | 372.38  | 24.24   | 408.63  | 43.51   | 489.88  | 106.34 |
| M55219   | Csprs             | 101845_s_at | N         | component of Sp100-rs                                  | signal transduction                                   | 0.85 | 0.98 | 1.15 | 21.85   | 2.26    | 19.04   | 1.82    | 18.59   | 1.15   |
| X15592   | Ctla2b            | 103518_at   | N         | cytotoxic T lymphocyte-associated protein 2 beta       | cysteine protease inhibitor                           | 1.44 | 1.34 | 0.93 | 41.61   | 6.92    | 44.73   | 7.75    | 59.93   | 16.54  |
| U49350   | Ctps              | 103341_at   | N         | cytidine 5'-triphosphate synthase                      | pyrimidine biosynthesis; glutamine metabolism         | 0.89 | 0.98 | 1.10 | 2172.46 | 52.78   | 1970.21 | 152.46  | 1925.79 | 130.84 |
| AJ242663 | Ctsz              | 92633_at    | EC, Lys   | cathepsin Z                                            | proteolysis and peptidolysis                          | 1.53 | 1.38 | 0.90 | 114.13  | 29.71   | 127.04  | 39.50   | 175.02  | 32.34  |
| L12029   | Cxc12             | 160511_at   | EC        | chemokine (C-X-C motif) ligand 12                      | signal transduction; growth factor                    | 2.58 | 1.68 | 0.65 | 57.12   | 14.39   | 87.88   | 27.86   | 147.51  | 80.49  |
| AF047529 | Cyp2b19           | 102690_at   | M         | cytochrome P450, family 2, subfamily b, polypeptide 19 | arachidonic acid epoxygenase                          | 0.91 | 0.98 | 1.08 | 167.44  | 6.91    | 155.15  | 10.73   | 152.47  | 7.33   |
| AA212964 | Cyp4v3            | 160611_at   | M         | cytochrome P450, family 4, subfamily v, polypeptide 3  | lipid metabolism                                      | 0.76 | 1.32 | 0.75 | 122.40  | 31.40   | 163.16  | 49.25   | 215.96  | 47.84  |
| AV039198 | Dab1              | 161291_at   | IC        | disabled homolog 1 (Drosophila)                        | adaptor protein, signal transduction                  | 1.73 | 0.75 | 1.03 | 26.89   | 5.02    | 26.21   | 5.07    | 19.63   | 17.00  |
| AF098508 | Dcn3              | 94522_at    | CySk      | dynactin 3                                             | intracellular transport                               | 0.74 | 0.77 | 1.03 | 1485.05 | 66.47   | 1439.10 | 264.65  | 1105.54 | 246.28 |
| AF004106 | Ddah2             | 92887_at    | M         | dimethylarginine dimethylaminohydrolase 2              | nitric oxide mediated signal transduction             | 1.36 | 1.18 | 0.87 | 314.04  | 30.06   | 361.36  | 67.02   | 427.99  | 56.30  |
| AF016697 | Dfy; FY;          | 93412_at    | M         | chemokine receptor                                     | signal transduction                                   | 0.76 | 0.83 | 1.10 | 311.46  | 39.97   | 284.31  | 45.12   | 236.08  | 41.09  |
| AW124813 | Dlat              | 96746_at    | mit       | E2 component of pyruvate dehydrogenase complex         | acetyl-CoA biosynthesis from pyruvate                 | 0.77 | 0.86 | 1.12 | 692.39  | 67.43   | 620.72  | 116.94  | 536.27  | 29.53  |
| AJ242625 | Dmp1; PP          | 99903_at    | IC, N, EC | dentin matrix protein                                  | transcription factor & mineralization of ECM          | 0.45 | 0.70 | 1.55 | 93.62   | 50.90   | 60.31   | 18.44   | 41.95   | 13.17  |
| AF032115 | Dnajc5            | 93211_at    | M         | DnaJ (Hsp40) homolog, subfamily C, member 5            | protein folding                                       | 0.90 | 0.97 | 1.08 | 180.78  | 15.63   | 168.09  | 6.74    | 162.84  | 4.89   |
| AF063229 | Dnrc1             | 103809_r_at | CySk      | dynein, cytoplasmic, intermediate chain 1              | microtubule-based movement                            | 0.82 | 0.89 | 1.08 | 3046.25 | 323.57  | 2818.23 | 169.04  | 2503.33 | 345.42 |
| AA717826 | Dpt               | 96742_at    | EC        | dermatopontin                                          | cell adhesion                                         | 2.15 | 1.72 | 0.80 | 42.05   | 9.32    | 52.49   | 21.36   | 90.23   | 40.82  |
| AW228162 | Dsc2              | 103506_f_at | M         | desmocollin 2                                          | cell adhesion                                         | 1.25 | 1.17 | 0.94 | 12.74   | 1.69    | 13.51   | 1.32    | 15.87   | 1.51   |
| AW121709 | Dtymk             | 98619_at    | M         | deoxythymidylate kinase                                | nucleotide biosynthesis                               | 1.19 | 1.11 | 0.94 | 86.78   | 6.82    | 92.76   | 8.63    | 102.98  | 10.09  |
| L12147   | Ebf1              | 92535_at    | N         | early B-cell factor 1                                  | transcription factor                                  | 1.19 | 1.11 | 0.94 | 43.10   | 2.27    | 46.05   | 2.59    | 51.15   | 4.32   |
| U13370   | Edg2              | 100435_at   | M         | lysophosphatidic acid G-protein-coupled receptor, 2    | signal transduction                                   | 1.70 | 1.27 | 0.74 | 490.22  | 138.96  | 660.17  | 148.71  | 835.69  | 90.86  |
| M17878   | Eef1a1-ps1        | 94766_at    | IC        | elongation factor Tu                                   | translation                                           | 1.94 | 1.36 | 0.70 | 3421.27 | 2055.72 | 4874.56 | 2335.27 | 6625.60 | 216.85 |
| U57686   | Efs               | 96195_at    | M         | embryonal Fyn-associated substrate                     | cell adhesion                                         | 1.13 | 1.06 | 0.94 | 136.14  | 7.64    | 144.78  | 9.73    | 153.31  | 7.78   |
| M27347   | Ela1              | 93783_at    | M         | elastase 1, pancreatic                                 | serine-type endopeptidase activity                    | 0.75 | 0.88 | 1.17 | 690.86  | 41.86   | 590.91  | 93.52   | 519.90  | 69.13  |
| U65735   | Elaiv1            | 94001_at    | IC        | embryonic lethal, abnormal vision, -like 1             | regulates stability & movement of mRNAs               | 1.52 | 1.21 | 0.79 | 73.42   | 5.95    | 92.59   | 16.10   | 111.84  | 17.65  |
| U19617   | Eli1              | 160721_at   | N         | E74-like factor 1                                      | transcription regulator                               | 0.17 | 1.09 | 0.90 | 17.40   | 0.66    | 19.29   | 1.75    | 21.08   | 2.94   |
| AF049702 | Eli5              | 103293_at   | N         | E74-like factor 5                                      | transcription regulator                               | 0.77 | 0.87 | 1.13 | 29.70   | 4.00    | 26.39   | 0.85    | 22.98   | 2.21   |
| AA919594 | Eln               | 92836_at    | EC        | elastin                                                | constituent of the ECM                                | 1.69 | 1.25 | 0.74 | 320.45  | 37.79   | 432.25  | 121.00  | 541.22  | 80.38  |
| J02700   | Enpp1             | 104174_at   | M         | ectonucleotide pyrophosphatase/phosphodiesterase 1     | nucleotide mediated signal transduction               | 1.31 | 1.09 | 0.83 | 66.36   | 2.72    | 79.84   | 6.50    | 86.64   | 15.15  |
| AV379405 | Entpd2            | 161821_f_at | M         | ectonucleoside triphosphate diphosphohydrolase 2       | nucleotide mediated signal transduction               | 1.26 | 1.09 | 0.87 | 80.51   | 8.67    | 92.98   | 7.11    | 101.44  | 11.71  |
| X79083   | Epha7             | 92906_at    | M         | Eph receptor A7                                        | cell adhesion                                         | 1.53 | 1.33 | 0.87 | 75.71   | 7.93    | 87.34   | 14.15   | 115.77  | 35.12  |
| A1836140 | Epln-pending      | 94561_at    | CySk      | epithelial protein lost in neoplasm                    | cytoskeletal organization                             | 1.37 | 1.17 | 0.86 | 228.24  | 15.28   | 266.63  | 45.98   | 312.34  | 42.64  |
| A1835644 | Erp29             | 98076_at    | ER        | endoplasmic reticulum protein 29                       | stress unresponsive reticuloplasmin                   | 1.17 | 1.07 | 0.91 | 584.05  | 48.67   | 638.71  | 59.06   | 685.88  | 47.92  |
| J04103   | Ets2              | 94246_at    | IC, N     | E26 avian leukemia oncogene 2, 3' domain               | transcription factor                                  | 1.20 | 1.07 | 0.89 | 161.31  | 7.80    | 180.71  | 11.22   | 193.04  | 19.32  |
| U04827   | Fabp7; B-FABP     | 98967_at    | M         | brain fatty acid-binding protein                       | regulates Schwann cell-axon interactions              | 3.01 | 1.89 | 0.63 | 628.02  | 217.67  | 998.40  | 613.73  | 1891.67 | 788.72 |
| AB033887 | Facl4             | 104017_at   | M         | fatty acid-Coenzyme A ligase, long chain 4             | fatty acid metabolism                                 | 0.79 | 0.93 | 1.17 | 28.74   | 1.87    | 24.47   | 2.78    | 22.70   | 3.18   |
| L29454   | Fbn1              | 101090_at   | EC        | fibrillin 1                                            | constituent of the ECM                                | 1.85 | 1.40 | 0.75 | 56.28   | 10.05   | 74.58   | 28.18   | 104.23  | 31.09  |
| M31312   | Fcgr2b; CD32; Fcr | 102337_s_at | M         | beta Fc receptor type II precursor;                    | signal transduction                                   | 1.27 | 1.16 | 0.91 | 32.83   | 2.39    | 36.01   | 5.04    | 41.76   | 6.20   |
| L17022   | Fcgrt             | 97533_at    | M         | Fc receptor, IgG, alpha chain transporter              | signal transduction                                   | 1.20 | 1.07 | 0.89 | 10.96   | 0.84    | 12.33   | 1.83    | 13.19   | 0.67   |
| D49920   | Fdxr              | 92754_at    | mit       | ferredoxin reductase                                   | electron transport                                    | 0.93 | 0.96 | 1.03 | 110.36  | 4.54    | 106.94  | 3.43    | 102.49  | 2.08   |
| A1196896 | Fgb               | 96868_at    | EC        | fibrinogen, B beta polypeptide                         | blood clotting                                        | 0.90 | 0.95 | 1.06 | 20.66   | 1.43    | 19.48   | 1.06    | 18.50   | 0.72   |
| M30641   | Fgf1              | 100494_at   | EC        | fibroblast growth factor 1                             | signal transduction, cell growth                      | 0.53 | 0.71 | 1.33 | 237.45  | 93.48   | 178.88  | 50.23   | 126.74  | 27.89  |
| AW125390 | Fgls; Ifitm3      | 160253_at   | M         | fragilis, interferon induced transmembrane protein 3   | signal transduction                                   | 1.51 | 1.07 | 0.71 | 193.79  | 38.72   | 273.36  | 92.21   | 293.14  | 54.86  |
| AF040252 | Fkbp7             | 104746_at   | ER        | FK506 binding protein 7                                | chaperone                                             | 1.30 | 1.12 | 0.86 | 47.87   | 4.89    | 55.54   | 11.35   | 62.04   | 6.62   |
| AF090334 | Fkbp9             | 93731_at    | ER        | FK506 binding protein 9                                | chaperone                                             | 2.17 | 1.41 | 0.65 | 316.47  | 155.54  | 485.83  | 301.65  | 685.40  | 219.65 |
| D16215   | Fmo1              | 101991_at   | M         | flavin containing monooxygenase 1                      | electron transport                                    | 2.17 | 1.53 | 0.70 | 94.00   | 12.41   | 133.59  | 46.16   | 203.96  | 70.61  |
| X94998   | Fmod              | 99152_at    | EC        | fibromodulin                                           | ECM organization                                      | 2.39 | 1.34 | 0.56 | 271.71  | 123.95  | 484.18  | 305.30  | 649.78  | 289.05 |
| M18194   | Fn1               | 92852_at    | EC        | fibronectin 1                                          | ECM, cell adhesion                                    | 1.82 | 1.18 | 0.65 | 302.33  | 114.75  | 467.86  | 129.90  | 551.28  | 153.05 |
| AF045017 | Foxc1             | 160604_at   | N         | forkhead box C1                                        | transcription factor                                  | 1.13 | 1.02 | 0.90 | 9.90    | 0.38    | 10.95   | 0.66    | 11.21   | 0.87   |
| L38607   | Foxd1             | 160996_at   | N         | forkhead box D1                                        | transcription factor                                  | 1.34 | 1.07 | 0.80 | 66.34   | 6.74    | 83.15   | 16.54   | 88.92   | 13.09  |
| U72680   | Fxyd5             | 103394_at   | M         | FXID domain-containing ion transport regulator 5       | regulates ion transport                               | 1.45 | 1.05 | 0.72 | 99.87   | 13.68   | 138.00  | 37.03   | 144.83  | 28.78  |
| D38557   | Galc              | 93131_at    | lys       | galactosylceramidase                                   | carbohydrate metabolism                               | 0.88 | 0.94 | 1.07 | 39.08   | 4.02    | 36.64   | 0.93    | 34.34   | 1.91   |
| U18975   | Galg1             | 103367_at   | G         | beta-1,4-N-acetylgalactosaminyltransferase             | glycosylation                                         | 0.69 | 0.73 | 1.06 | 301.78  | 27.41   | 284.52  | 79.43   | 207.47  | 43.43  |
| AW121380 | Gaint9            | 102352_at   | G         | N-acetylgalactosaminyltransferase 9                    | glycosylation                                         | 1.19 | 1.09 | 0.91 | 120.29  | 7.44    | 131.51  | 10.95   | 143.54  | 15.26  |
| A1841303 | Gap43             | 102389_s_at | M         | growth associated protein 43                           | regulation of growth, synaptic plasticity and release | 2.64 | 2.01 | 0.76 | 562.79  | 324.58  | 740.97  | 168.10  | 1487.40 | 228.11 |
| A1849615 | Gas5              | 98531_g_at  | M         | growth arrest specific 5                               | unknown                                               | 1.73 | 1.26 | 0.73 | 1673.16 | 222.57  | 2303.50 | 526.87  | 2901.23 | 537.49 |
| X59846   | Gas6              | 99067_at    | EC        | growth arrest specific 6                               | vitamin K-dependent growth factor                     | 0.66 | 0.73 | 1.10 | 597.88  | 68.90   | 543.80  | 181.23  | 395.07  | 123.52 |
| A1844626 | Gatm              | 96336_at    | mit       | glycine amidinotransferase                             | creatine biosynthesis                                 | 1.38 | 1.29 | 0.94 | 1152.51 | 173.36  | 1230.49 | 254.75  | 1591.93 | 250.98 |
| AW210370 | Gbe1              | 96803_at    | IC        | glucan (1,4-alpha)-, branching enzyme 1                | glycogen metabolism                                   | 0.50 | 0.77 | 1.55 | 89.90   | 25.09   | 57.97   | 22.46   | 44.72   | 15.24  |
| U95053   | Gclm              | 160335_at   | IC        | glutamate-cysteine ligase, modifier subunit            | glutathione biosynthesis                              | 0.59 | 0.71 | 1.21 | 390.83  | 102.34  | 322.13  | 66.85   | 230.29  | 61.07  |
| C79210   | Ggpi1             | 104222_f_at | IC        | geranylgeranyl diphosphate synthase 1                  | isoprenoid biosynthesis                               | 0.89 | 0.94 | 1.05 | 149.50  | 7.56    | 141.88  | 6.16    | 133.75  | 11.68  |
| M85153   | Ggta1             | 102993_at   | G         | glycoprotein galactosyltransferase alpha 1, 3          | carbohydrate metabolism                               | 1.60 | 1.26 | 0.79 | 139.21  | 9.06    | 176.54  | 48.37   | 222.62  | 37.71  |
| M63801   | Gja1              | 100064_f_at | M         | gap junction membrane channel protein alpha 1          | constituent of connexon complex                       | 1.47 | 1.19 | 0.81 | 3549.05 | 748.90  | 4393.59 | 933.97  | 5214.19 | 967.84 |
| L46651   | Gla; Ags          | 102341_at   | lys       | alpha-D-galactosidase                                  | carbohydrate metabolism                               | 0.86 | 0.92 | 1.07 | 42.43   | 2.94    | 39.63   | 2.36    | 36.60   | 1.31   |
| X81202   | Glr3              | 104449_at   | M         | glycine receptor, beta subunit                         | synaptic transmission                                 | 0.71 | 0.96 | 1.35 | 3932.12 | 426.83  | 2914.62 | 700.03  | 2809.71 | 652.86 |
| A1841629 | Gnai2             | 99598_g_at  | M         | guanine nucleotide binding protein, alpha inhibiting 2 | signal transduction                                   | 1.48 | 1.27 | 0.85 | 725.97  | 39.22   | 851.18  | 229.70  |         |        |

|                 |                   |                    |           |                                                             |                                                     |             |             |             |              |              |              |              |              |              |
|-----------------|-------------------|--------------------|-----------|-------------------------------------------------------------|-----------------------------------------------------|-------------|-------------|-------------|--------------|--------------|--------------|--------------|--------------|--------------|
| AJ225123        | Hcn1              | 99902_at           | M         | hyperpolarization-activated, cyclic nucleotide-gated K+ 1   | ion channel                                         | 0.55        | 0.76        | 1.38        | 122.64       | 30.32        | 88.96        | 12.19        | 67.59        | 8.70         |
| M68902          | Hcph              | 102851_s_at        | IC        | hemopoietic cell phosphatase                                | signal transduction                                 | 1.15        | 1.12        | 0.97        | 25.06        | 2.06         | 25.75        | 1.95         | 28.83        | 2.62         |
| AB013095        | Hebp1             | 103085_at          | IC        | heme binding protein 1                                      | heme metabolism                                     | 1.30        | 1.23        | 0.95        | 131.05       | 13.51        | 138.01       | 12.88        | 170.19       | 28.20        |
| AB017132        | Hhex; Hex; Prh    | 98408_at           | N         | Hex (Prh)                                                   | transcription factor                                | 1.19        | 1.07        | 0.90        | 67.68        | 7.30         | 75.22        | 3.69         | 80.21        | 8.56         |
| AW123564        | Hop-pending       | 96672_at           | N         | homeodomain only protein                                    | transcription factor                                | 1.50        | 1.34        | 0.89        | 884.78       | 192.19       | 990.42       | 131.04       | 1325.30      | 304.42       |
| AV279579        | Hoxa4             | 162402_r_at        | N         | homeo box A4                                                | transcription factor                                | 0.85        | 0.97        | 1.14        | 16.82        | 1.22         | 14.77        | 1.43         | 14.32        | 1.16         |
| AF030065        | Hpn               | 160639_at          | M         | hepsin                                                      | proteolysis and peptidolysis                        | 0.79        | 0.91        | 1.15        | 73.24        | 10.99        | 63.54        | 8.86         | 57.55        | 3.29         |
| AA824102        | Hsd3b7            | 160104_at          | M         | HSD5D, 3 beta- and steroid delta-isomerase 7                | steroid metabolism                                  | 1.27        | 1.13        | 0.89        | 224.98       | 18.06        | 253.51       | 16.61        | 285.95       | 28.62        |
| M31885          | Idb1              | 100050_at          | N         | inhibitor of DNA binding 1                                  | transcription factor                                | 1.40        | 1.15        | 0.82        | 78.98        | 13.21        | 96.44        | 25.27        | 110.89       | 17.35        |
| M60523          | Idb3              | 92614_at           | N         | inhibitor of DNA binding 3                                  | transcription factor                                | 1.69        | 1.26        | 0.75        | 138.36       | 19.13        | 185.35       | 67.19        | 233.91       | 65.17        |
| U51167          | Ihd2              | 95693_at           | mit       | isocitrate dehydrogenase                                    | tricarboxylic acid cycle                            | 1.39        | 1.06        | 0.76        | 214.29       | 25.72        | 282.53       | 61.51        | 298.68       | 56.49        |
| A1838061        | Ihd3b             | 95676_at           | mit       | isocitrate dehydrogenase 3 (NAD+) beta                      | tricarboxylic acid cycle                            | 0.91        | 0.98        | 1.08        | 65.68        | 4.37         | 60.62        | 2.50         | 59.49        | 3.41         |
| X67644          | Ier3              | 94384_at           | M         | immediate early response 3                                  | stress signal transduction                          | 0.77        | 0.88        | 1.14        | 232.18       | 23.21        | 203.28       | 23.86        | 179.28       | 22.57        |
| U43085          | Ilf12             | 103639_at          | M         | interferon-induced protein with tetratricopeptide repeats 2 | unknown                                             | 1.62        | 1.27        | 0.78        | 57.26        | 13.91        | 73.33        | 20.13        | 92.99        | 21.16        |
| Y09864          | Ilfar2            | 101014_at          | M         | interferon (alpha and beta) receptor 2                      | signal transduction                                 | 1.20        | 1.12        | 0.93        | 58.65        | 4.06         | 63.08        | 7.55         | 70.55        | 4.98         |
| X71922          | Igf2; Mpr; M6pr   | 98623_g_at         | EC        | insulin-like growth factor 2                                | growth factor, signal transduction                  | 2.87        | 1.50        | 0.52        | 2416.06      | 1432.42      | 4632.00      | 1996.58      | 6937.16      | 1150.94      |
| A1838737        | Igfbp4            | 94222_g_at         | EC        | insulin-like growth factor binding protein 4                | cell growth, signal transduction                    | 1.18        | 1.07        | 0.91        | 310.28       | 17.62        | 341.01       | 17.12        | 364.62       | 34.79        |
| X76066          | Igfbp4; IGFBP-4   | 101571_g_at        | EC        | insulin-like growth factor binding protein 4                | cell growth, signal transduction                    | 1.24        | 1.09        | 0.88        | 157.80       | 15.03        | 179.79       | 14.48        | 195.22       | 25.01        |
| L12447          | Igfbp5            | 100566_at          | EC        | insulin-like growth factor binding protein 5                | cell growth, signal transduction                    | 4.36        | 1.48        | 0.34        | 256.86       | 178.61       | 757.23       | 699.65       | 1119.62      | 410.93       |
| U53696          | I110rb            | 99491_at           | M         | interleukin 10 receptor, beta                               | cell surface receptor linked signal transduction    | 1.65        | 1.34        | 0.81        | 570.21       | 103.84       | 703.19       | 205.97       | 938.78       | 198.67       |
| AA608387        | I13ra1            | 103723_at          | M         | interleukin 13 receptor, alpha 1                            | cell surface receptor linked signal transduction    | 1.72        | 1.25        | 0.72        | 38.06        | 7.45         | 52.55        | 17.22        | 65.54        | 12.06        |
| M26271          | IL2R              | 101917_at          | M         | Mouse interleukin 2 receptor gene 5, 5' end.                | cell surface receptor linked signal transduction    | 0.85        | 0.93        | 1.10        | 25.86        | 2.65         | 23.43        | 2.05         | 21.89        | 1.19         |
| X06271          | Il5; IL-5         | 98374_at           | EC        | interleukin 5 (eosinophil differentiation factor).          | cell surface receptor linked signal transduction    | 0.90        | 0.99        | 1.10        | 73.47        | 3.06         | 66.50        | 3.28         | 66.01        | 6.25         |
| U00978          | Impdh1            | 98390_at           | IC        | inosine 5'-phosphate dehydrogenase 1                        | purine nucleotide biosynthesis                      | 0.73        | 0.88        | 1.21        | 207.65       | 41.08        | 172.05       | 32.30        | 151.16       | 12.52        |
| AW120756        | Inpp5e            | 96848_at           | G         | inositol polyphosphate 5-phosphatase                        | lipid metabolism                                    | 0.91        | 0.93        | 1.02        | 50.58        | 1.81         | 49.81        | 3.63         | 46.22        | 1.16         |
| A1837528        | Jak1              | 98911_at           | IC        | Janus kinase 1                                              | signal transduction                                 | 0.69        | 0.72        | 1.04        | 898.86       | 202.04       | 861.74       | 202.34       | 618.69       | 155.17       |
| L16956          | Jak2              | 101457_at          | IC        | Janus kinase 2                                              | signal transduction                                 | 1.27        | 1.17        | 0.92        | 96.37        | 10.34        | 104.82       | 12.37        | 122.41       | 15.87        |
| L22218          | Kcnas5            | 102295_at          | M         | voltage-gated K channel, shaker subfamily, member 5         | ion channel subunit                                 | 1.51        | 1.24        | 0.82        | 34.16        | 1.08         | 41.80        | 5.35         | 51.74        | 7.93         |
| AV335854        | Kcnab1            | 162087_f_at        | IC        | voltage-gated K channel, shaker subfamily, beta member 1    | ion channel subunit                                 | 0.68        | 0.76        | 1.12        | 251.06       | 45.50        | 224.75       | 42.81        | 171.78       | 11.48        |
| U65593          | Kcnab3            | 102577_at          | IC        | voltage-gated K channel, shaker subfamily, beta member 3    | ion channel subunit                                 | 0.82        | 0.86        | 1.04        | 137.54       | 17.44        | 131.77       | 13.57        | 113.15       | 6.76         |
| D45022          | Kcnj3             | 101188_at          | M         | inward-rectifying K channel, subfamily J, member 3          | ion channel subunit                                 | 0.91        | 0.94        | 1.04        | 29.76        | 1.92         | 28.60        | 1.02         | 26.95        | 1.25         |
| AF025389        | Kdeir3            | 104464_s_at        | ER        | KDEL ER protein retention receptor 3                        | intracellular protein transport                     | 1.60        | 1.19        | 0.74        | 67.19        | 16.98        | 90.27        | 31.66        | 107.68       | 20.61        |
| AF055685        | Kns2              | 93565_at           | IC        | kinase II                                                   | microtubule-based movement                          | 0.78        | 0.93        | 1.19        | 3500.63      | 427.70       | 2926.70      | 128.78       | 2729.79      | 383.05       |
| D89802          | Krtap5-2; HGTp1L4 | 92253_at           | CySk      | high-glycine tyrosine keratin type II.4                     | intermediate filament of cytoskeleton               | 0.87        | 0.98        | 1.12        | 123.74       | 13.17        | 110.61       | 3.14         | 107.85       | 7.69         |
| AV357656        | Lamb1-1           | 162263_f_at        | EC        | laminin B1 subunit 1                                        | ECM component                                       | 2.32        | 1.61        | 0.69        | 101.45       | 43.27        | 146.01       | 77.91        | 235.20       | 89.93        |
| AW122780        | Lasp1             | 93793_at           | IC        | LIM and SH3 protein 1                                       | adaptor in signal transduction                      | 1.38        | 1.13        | 0.82        | 207.96       | 31.98        | 252.98       | 27.34        | 286.94       | 41.36        |
| X9347           | Lbp               | 96123_at           | EC        | lipopolysaccharide binding protein                          | lipopolysaccharide transport                        | 1.80        | 1.16        | 0.64        | 347.57       | 79.43        | 540.32       | 199.45       | 625.84       | 112.29       |
| D37837          | Lcp1              | 94278_at           | CySk      | lymphocyte cytosolic protein 1                              | actin cross-linker                                  | 0.41        | 0.56        | 1.35        | 1368.27      | 729.13       | 1014.84      | 325.61       | 568.04       | 228.93       |
| X86569          | Limk1             | 102889_f_at        | IC        | LIM-domain containing, protein kinase                       | cytoskeletal regulation                             | 0.92        | 0.97        | 1.06        | 1631.60      | 113.93       | 1539.20      | 55.55        | 1493.29      | 31.39        |
| A1852632        | Litaf             | 93753_at           | N         | LPS-induced TNF-alpha factor                                | transcription factor                                | 1.51        | 1.20        | 0.79        | 198.95       | 44.97        | 250.93       | 45.32        | 299.96       | 35.46        |
| A1152966        | C1qdc1            | 92208_at           | IC        | C1q domain containing 1                                     | unknown                                             | 0.72        | 0.88        | 1.23        | 293.32       | 46.12        | 238.76       | 30.37        | 210.69       | 32.46        |
| AV232133        | Lox               | 161177_f_at        | EC        | lysyl oxidase                                               | oxidoreductase activity                             | 1.22        | 1.06        | 0.87        | 68.74        | 4.51         | 79.07        | 6.33         | 84.16        | 9.62         |
| D49691          | Lsp1              | 104049_at          | CySk      | lymphocyte specific 1                                       | filamentous-actin binding protein                   | 1.48        | 1.27        | 0.86        | 74.70        | 6.84         | 86.76        | 15.92        | 110.47       | 27.31        |
| AF022889        | Ltp1              | 103209_at          | EC        | latent transforming growth factor beta binding protein 1    | TGF beta receptor signal transduction               | 1.55        | 1.23        | 0.80        | 44.96        | 4.15         | 56.32        | 11.38        | 69.47        | 13.93        |
| A1849993        | Ly6h              | 103487_at          | M         | lymphocyte antigen 6 complex, locus H                       | cell surface glycoprotein, growth regulation        | 1.42        | 1.23        | 0.86        | 369.25       | 32.02        | 427.75       | 66.57        | 524.09       | 59.88        |
| A1875934        | Lypla1            | 97207_f_at         | mit       | lysophospholipase 1                                         | lipid metabolism                                    | 0.83        | 0.94        | 1.14        | 935.25       | 99.06        | 818.82       | 101.03       | 772.56       | 72.10        |
| X51547          | Lzp-s             | 101753_s_at        | EC        | P lyszyme structural                                        | carbohydrate metabolism                             | 2.03        | 1.76        | 0.87        | 65.45        | 9.21         | 75.49        | 17.14        | 132.74       | 84.84        |
| M41172          | Man2a1            | 104628_at          | G         | mannosidase 2, alpha 1                                      | carbohydrate metabolism                             | 1.32        | 1.19        | 0.90        | 197.21       | 21.35        | 219.80       | 40.21        | 261.13       | 34.08        |
| AV317327        | Mapk1             | 161583_at          | IC, N     | mitogen activated protein kinase 1                          | signal transduction                                 | 0.83        | 0.94        | 1.13        | 38.14        | 2.60         | 33.85        | 2.98         | 31.65        | 3.26         |
| AB005664        | Mapk9             | 101362_at          | IC        | mitogen activated protein kinase 9                          | signal transduction                                 | 0.79        | 0.94        | 1.20        | 133.03       | 18.65        | 111.22       | 6.95         | 104.82       | 19.94        |
| U51196          | Mapre1            | 93306_at           | CySk      | microtubule-associated protein, RP/EB family, member 1      | regulates microtubule dynamics                      | 1.25        | 1.14        | 0.91        | 1352.11      | 115.63       | 1489.44      | 159.97       | 1694.15      | 207.29       |
| <b>U69262</b>   | <b>Matn2</b>      | <b>98475_at</b>    | <b>EC</b> | <b>matrin 2</b>                                             | <b>non-collagenous extracellular matrix protein</b> | <b>2.21</b> | <b>1.68</b> | <b>0.76</b> | <b>26.12</b> | <b>10.95</b> | <b>34.30</b> | <b>18.69</b> | <b>57.78</b> | <b>19.05</b> |
| AJ010984        | Matn4; matrilin-4 | 96835_at           | EC        | matrilin 4                                                  | non-collagenous extracellular matrix protein        | 1.40        | 1.15        | 0.82        | 132.42       | 17.81        | 160.74       | 38.96        | 185.30       | 36.36        |
| A1853261        | Mcam              | 160458_at          | M         | melanoma cell adhesion molecule                             | cell adhesion                                       | 0.50        | 0.64        | 1.27        | 1477.70      | 643.83       | 1162.50      | 305.31       | 744.24       | 203.34       |
| A1852838        | Meg3              | 160173_at          | M         | maternally expressed gene 3                                 | growth suppressor                                   | 0.75        | 0.85        | 1.13        | 111.93       | 18.26        | 98.68        | 10.00        | 84.00        | 7.21         |
| U33629          | Meis1             | 98790_s_at         | N         | myeloid ecotropic viral integration site 1                  | transcription factor                                | 1.39        | 1.14        | 0.82        | 61.15        | 6.84         | 74.67        | 17.02        | 85.16        | 7.20         |
| Z16406          | Meox2             | 99937_at           | N         | mesenchyme homeobox 2                                       | transcription factor                                | 1.40        | 1.38        | 0.73        | 11.14        | 0.97         | 15.35        | 6.16         | 21.17        | 5.93         |
| AF017994        | Mest; Peg1        | 92607_at           | EC        | mesoderm specific transcript                                | proteolysis and peptidolysis                        | 0.92        | 0.85        | 2.05        | 157.67       | 92.87        | 76.86        | 30.46        | 65.57        | 24.84        |
| AB003144        | Metap2            | 93505_at           | N         | methionine aminopeptidase 2                                 | proteolysis and peptidolysis                        | 0.88        | 0.93        | 1.06        | 23.21        | 1.12         | 21.95        | 1.64         | 20.39        | 1.80         |
| A1957146        | Mfhas1            | 93195_at           | EC        | malignant fibrous histiocytoma amplified sequence 1         | signal transduction                                 | 1.56        | 1.16        | 0.74        | 479.17       | 137.62       | 648.11       | 65.74        | 748.64       | 198.74       |
| D00613          | Mglap             | 93866_s_at         | mit, mic  | matrix gamma-carboxylglutamate (gla) protein                | calcium binding protein                             | 2.52        | 0.99        | 0.40        | 88.38        | 53.02        | 223.58       | 170.16       | 222.37       | 93.84        |
| AW124337        | Mgst1             | 93026_at           | mit, mic  | microsomal glutathione S-transferase 1                      | glutathione metabolism                              | 1.34        | 1.20        | 0.90        | 38.83        | 5.28         | 43.37        | 7.99         | 52.05        | 4.48         |
| AW050035        | Mic21             | 160435_at          | M         | MIC2-like 1                                                 | unknown                                             | 0.78        | 0.83        | 1.06        | 1468.95      | 120.88       | 1383.71      | 164.43       | 1149.68      | 217.94       |
| AV316101        | Mizf-pending      | 161581_r_at        | N         | MBD2-interacting zinc finger protein                        | DNA methylation and transcription repression        | 0.85        | 0.87        | 1.03        | 136.99       | 18.29        | 133.08       | 7.10         | 116.05       | 8.77         |
| AF100171        | Mlf1              | 102061_at          | N         | myeloid leukemia factor 1                                   | cell differentiation                                | 1.28        | 1.12        | 0.88        | 19.21        | 1.78         | 21.95        | 1.69         | 24.57        | 2.48         |
| AF010135        | Mlit10            | 93878_at           | N         | MLT 10 homolog                                              | regulation of transcription                         | 0.91        | 0.97        | 1.06        | 95.10        | 2.37         | 89.41        | 6.68         | 86.33        | 2.92         |
| X61399          | Mlp               | 97203_at           | N         | MARCKS-like protein                                         | signal transduction                                 | 1.40        | 1.27        | 0.91        | 180.89       | 11.58        | 198.54       | 33.22        | 252.52       | 62.71        |
| Z11974          | Mrc1              | 103226_at          | M         | mannose receptor, C type 1                                  | endocytosis                                         | 1.88        | 1.43        | 0.76        | 30.74        | 8.25         | 40.39        | 19.43        | 57.85        | 11.61        |
| U84903          | Mrp123; Rpl23     | 92646_at           | mit       | L23 mitochondrial-related protein                           | mitochondrial large ribosomal subunit               | 1.25        | 1.04        | 0.83        | 395.72       | 24.61        | 474.20       | 56.63        | 494.71       | 64.03        |
| A1853575        | Mrps2             | 160423_at          | mit       | mitochondrial ribosomal protein S2                          | constituent of mitochondrial ribosome               | 0.71        | 0.77        | 1.08        | 242.59       | 47.78        | 223.60       | 44.93        | 172.50       | 24.86        |
| <b>A1504305</b> | <b>Ms4a6b</b>     | <b>102104_f_at</b> | <b>M</b>  | <b>membrane-spanning 4-domains, subfamily A, member 6B</b>  | <b>signal transduction</b>                          | <b>1.25</b> | <b>1.14</b> | <b>0.92</b> | <b>20.91</b> | <b>1.45</b>  | <b>22.82</b> | <b>3.16</b>  | <b>26.05</b> | <b>2.23</b>  |
| <b>A1835093</b> | <b>Ms4a6b</b>     | <b>97322</b>       |           |                                                             |                                                     |             |             |             |              |              |              |              |              |              |

|          |              |             |          |                                                             |                                                      |      |      |      |         |         |         |        |         |        |
|----------|--------------|-------------|----------|-------------------------------------------------------------|------------------------------------------------------|------|------|------|---------|---------|---------|--------|---------|--------|
| Y09257   | Nov          | 100507_at   | EC       | nephroblastoma overexpressed gene                           | insulin-like growth factor binding activity          | 3.05 | 1.92 | 0.63 | 123.24  | 69.56   | 195.19  | 103.05 | 375.33  | 172.45 |
| AA592182 | Npnt         | 103721_at   |          | nephronectin                                                | cell-matrix adhesion                                 | 1.27 | 1.14 | 0.90 | 55.48   | 4.47    | 61.79   | 6.71   | 70.50   | 13.52  |
| AF004927 | Oprs1        | 94828_at    | M, ER    | opioid receptor, sigma 1                                    | opioid signal transduction, lipid biosynthesis       | 0.71 | 0.84 | 1.19 | 466.56  | 54.52   | 392.24  | 80.55  | 330.22  | 64.27  |
| AI553463 | Orc4l        | 103500_at   | N        | origin recognition complex, subunit 4-like (S. cerevisiae)  | DNA replication                                      | 1.59 | 1.27 | 0.80 | 83.59   | 15.44   | 104.64  | 12.92  | 133.18  | 9.89   |
| AI42377  | P5-pending   | 94207_at    | ER       | protein disulfide isomerase-related protein                 |                                                      | 1.22 | 1.14 | 0.94 | 235.42  | 32.08   | 250.16  | 20.63  | 286.18  | 26.26  |
| D16580   | Padl2        | 103526_at   |          | peptidyl arginine deiminase, type II                        | Ca-dependent protein modification                    | 1.45 | 1.15 | 0.79 | 374.66  | 41.97   | 472.76  | 73.30  | 542.93  | 75.66  |
| U39738   | Plak3        | 161021_at   |          | p21 (CDKN1A)-activated kinase 3                             | signal transduction                                  | 0.71 | 0.86 | 1.21 | 184.68  | 28.67   | 152.96  | 26.88  | 131.51  | 33.88  |
| AI323533 | Papss1       | 102122_f_at |          | 3'-phosphoadenosine 5'-phosphosulfate synthase 1            | sulfate assimilation                                 | 0.86 | 0.92 | 1.06 | 301.29  | 19.40   | 283.84  | 18.78  | 260.01  | 20.16  |
| AI847661 | Papss1       | 102374_at   |          |                                                             |                                                      | 1.49 | 1.23 | 0.83 | 523.17  | 48.18   | 633.79  | 41.48  | 777.26  | 181.01 |
| AF052453 | Papss2       | 96713_at    |          | 3'-phosphoadenosine 5'-phosphosulfate synthase 2            | sulfate assimilation                                 | 1.47 | 1.22 | 0.83 | 23.84   | 3.25    | 28.74   | 5.88   | 34.94   | 8.24   |
| AA260005 | Pawr         | 93439_f_at  | IC, N    | PRKC, apoptosis, W11, regulator                             | signal transduction                                  | 1.86 | 1.09 | 0.59 | 12.13   | 3.21    | 20.64   | 8.74   | 22.52   | 5.72   |
| AW124044 | Pcmt1        | 94348_f_at  |          | protein-L-isoaspartate (D-aspartate) O-methyltransferase 1  | protein modification                                 | 0.81 | 0.85 | 1.06 | 4957.21 | 470.69  | 4688.57 | 412.61 | 4005.07 | 551.57 |
| M69196   | Pcsk1        | 94694_at    | EC       | proprotein convertase subtilisin/kexin type 1               | proteolysis and peptidolysis                         | 1.40 | 1.31 | 0.94 | 99.19   | 14.61   | 105.97  | 11.33  | 138.40  | 26.81  |
| AV138382 | Pdcd6        | 162490_f_at | IC       | programmed cell death 6                                     | apoptotic response                                   | 0.77 | 0.92 | 1.19 | 32.63   | 3.25    | 27.39   | 3.25   | 25.18   | 3.08   |
| AJ005073 | Pdcd6ip      | 96252_at    | IC       | programmed cell death 6 interacting protein                 | signal transduction                                  | 0.76 | 0.90 | 1.19 | 458.46  | 52.32   | 384.08  | 39.25  | 346.26  | 49.62  |
| AF042491 | Pgrmc1       | 101585_at   | M        | progesterone receptor membrane component 1                  | signal transduction                                  | 1.76 | 1.47 | 0.84 | 853.39  | 247.25  | 1021.10 | 360.45 | 1505.12 | 283.24 |
| AI850079 | Pib5pa       | 103732_at   | IC       | phosphatidylinositol (4,5) biphosphate 5-phosphatase, A     | signal modifying enzyme                              | 0.74 | 0.81 | 1.10 | 612.18  | 87.18   | 556.58  | 114.84 | 452.05  | 71.63  |
| AB008791 | Pik3c2g      | 94108_at    | M        | phosphatidylinositol 3-kinase, C2, gamma polypeptide        | phosphatidylinositol metabolism, signal transduction | 0.80 | 0.84 | 1.05 | 41.03   | 2.69    | 38.98   | 6.00   | 32.84   | 4.05   |
| D86176   | Pip5k1a      | 103573_at   |          | phosphatidylinositol-4-phosphate 5-kinase, type 1 alpha     | phosphatidylinositol metabolism, signal transduction | 0.80 | 0.77 | 1.27 | 266.85  | 50.29   | 210.63  | 33.76  | 162.54  | 27.91  |
| U71206   | Pitx1        | 92920_at    | N        | paired-like homeodomain transcription factor 1              | transcriptional regulation                           | 0.89 | 0.96 | 1.08 | 315.22  | 22.48   | 290.90  | 17.31  | 279.00  | 20.28  |
| D30779   | Pla2g1br     | 98853_at    | M        | phospholipase A2, group IB, pancreas, receptor              | lipid metabolism, signal transduction                | 1.26 | 1.18 | 0.94 | 17.44   | 1.42    | 18.62   | 1.61   | 21.96   | 2.65   |
| U85713   | Plc1b1       | 92465_at    | IC       | phospholipase C, beta 1                                     | signal transduction                                  | 0.91 | 0.96 | 1.06 | 43.44   | 3.51    | 40.94   | 1.73   | 39.34   | 0.94   |
| AB031292 | Plp2         | 93323_at    | M        | proteolipid protein 2                                       | unknown                                              | 1.40 | 1.16 | 0.83 | 597.27  | 72.73   | 719.82  | 104.68 | 834.74  | 119.59 |
| D78354   | Plscr1       | 102839_at   | M        | phospholipid scramblase 1                                   | membrane lipid organization                          | 1.37 | 1.27 | 0.93 | 76.11   | 5.54    | 82.26   | 10.38  | 104.54  | 22.26  |
| AB023027 | Pnck         | 93910_at    | N        | pregnancy upregulated non-ubiquitously expressed CaM kinase | signal transduction                                  | 1.69 | 1.40 | 0.83 | 124.34  | 33.77   | 149.82  | 33.72  | 210.24  | 67.05  |
| X68363   | Pou2f1       | 102894_g_at | N        | POU domain, class 2, transcription factor 1                 | transcription factor                                 | 0.88 | 0.94 | 1.06 | 96.74   | 6.18    | 90.85   | 6.63   | 85.45   | 4.47   |
| D84376   | Ppap2a       | 98508_s_at  | M        | phosphatidic acid phosphatase 2a                            | lipid metabolism, signal transduction                | 0.69 | 0.82 | 1.18 | 682.51  | 97.39   | 576.10  | 47.40  | 469.90  | 95.01  |
| AI842675 | Ppilf        | 99159_at    | mit      | peptidylprolyl isomerase F (cyclophilin F)                  | protein folding                                      | 0.80 | 0.87 | 1.09 | 331.26  | 26.07   | 305.01  | 24.76  | 265.20  | 32.32  |
| AW124336 | Ppp6c        | 160821_r_at |          | protein phosphatase 6, catalytic subunit                    | signal transduction                                  | 0.80 | 0.86 | 1.08 | 379.19  | 43.83   | 352.31  | 36.75  | 301.69  | 31.27  |
| M28723   | Prdx3        | 96256_at    | mit      | peroxiredoxin 3                                             | peroxidase reaction                                  | 0.80 | 0.90 | 1.13 | 1593.84 | 36.55   | 1403.88 | 65.24  | 1268.76 | 202.86 |
| J04148   | Prt1         | 93932_at    | EC       | perforin 1 (pore forming protein)                           | cytolysis                                            | 0.79 | 0.89 | 1.13 | 76.02   | 7.71    | 67.20   | 6.25   | 60.10   | 4.37   |
| L27449   | Prost1       | 1047728_at  | EC       | protein S (alpha)                                           | blood coagulation                                    | 2.16 | 1.42 | 0.66 | 109.50  | 30.86   | 166.37  | 76.61  | 236.16  | 74.31  |
| AW125478 | Prss11       | 96920_at    | EC       | protease, serine, 11 (Igf binding)                          | proteolysis and peptidolysis                         | 0.67 | 0.65 | 1.15 | 2573.57 | 1023.22 | 2229.81 | 361.56 | 1456.53 | 377.21 |
| Y18723   | Prss18       | 92353_at    | EC       | protease, serine, 18                                        | proteolysis and peptidolysis                         | 2.04 | 1.24 | 0.61 | 167.51  | 45.62   | 274.92  | 79.33  | 341.73  | 139.26 |
| AW121166 | Prss8        | 160566_at   | M        | protease, serine, 8 (prostasin)                             | proteolysis and peptidolysis                         | 0.93 | 0.99 | 1.07 | 40.91   | 2.33    | 38.10   | 1.36   | 37.89   | 1.61   |
| U65636   | Psmb4        | 98558_r_at  | IC       | proteasome (prosome, macropain) subunit, beta type 4        | ubiquitin-dependent protein catabolism               | 0.92 | 0.97 | 1.05 | 11.60   | 0.39    | 11.02   | 0.20   | 10.73   | 0.77   |
| AB000121 | Psmc3ip      | 102970_at   | IC       | proteasome 26S subunit, ATPase 3, interacting protein       | ubiquitin-dependent protein catabolism               | 0.81 | 0.91 | 1.12 | 80.77   | 8.51    | 71.83   | 7.45   | 65.68   | 6.09   |
| AV248657 | Psmc3        | 161674_i_at | IC       | proteasome 26S subunit, non-ATPase, 3                       | ubiquitin-dependent protein catabolism               | 0.85 | 0.93 | 1.09 | 114.24  | 10.75   | 104.36  | 4.91   | 97.36   | 5.95   |
| AI839158 | Psmc8        | 98522_at    | IC       | proteasome 26S subunit, non-ATPase, 8                       | ubiquitin-dependent protein catabolism               | 0.81 | 0.84 | 1.04 | 419.94  | 39.34   | 404.47  | 50.28  | 338.82  | 49.02  |
| D83966   | Ptpn13       | 98424_at    | IC, CySk | protein tyrosine phosphatase, non-receptor type 13          | signal transduction                                  | 1.61 | 1.33 | 0.82 | 98.83   | 11.04   | 119.84  | 33.50  | 159.26  | 33.21  |
| D31898   | Ptpr         | 92303_at    | IC       | protein tyrosine phosphatase, receptor type, R              | signal transduction                                  | 1.27 | 1.22 | 0.96 | 557.34  | 36.01   | 582.06  | 58.12  | 708.69  | 121.77 |
| U36488   | Ptprv        | 92661_at    | M        | protein tyrosine phosphatase, receptor type                 | signal transduction                                  | 0.88 | 0.96 | 1.09 | 25.71   | 0.86    | 23.59   | 2.22   | 22.75   | 1.50   |
| AI837010 | Pum2         | 93580_at    |          | pumilio 2 (Drosophila)                                      | translational regulation                             | 1.50 | 1.22 | 0.81 | 1006.10 | 337.86  | 1238.74 | 234.98 | 1511.37 | 248.47 |
| AA798971 | Rab3ip       | 95539_at    | IC       | RAB3A interacting protein                                   | signal transduction                                  | 0.80 | 0.84 | 1.05 | 192.84  | 26.07   | 183.47  | 23.19  | 153.95  | 10.31  |
| AW047017 | Rab14        | 95686_at    | IC       | RAB14, member RAS oncogene family                           | G protein, signal transduction                       | 0.83 | 0.96 | 1.16 | 58.79   | 5.70    | 50.76   | 4.28   | 48.91   | 5.88   |
| AI835712 | Rab34        | 160317_at   | G        | RAB34, member of RAS oncogene family                        | G protein, signal transduction                       | 1.25 | 1.11 | 0.89 | 218.61  | 17.28   | 246.92  | 42.43  | 273.95  | 24.97  |
| AF034955 | Rad51l3      | 101924_at   | N        | RAD51-like 3 (S. cerevisiae)                                | DNA repair & recombination                           | 0.91 | 0.97 | 1.07 | 93.51   | 4.37    | 87.65   | 3.93   | 84.68   | 5.44   |
| AW124597 | Rap1gds1     | 96733_at    |          | RAP1, GTP-GDP dissociation stimulator 1                     | signal transduction                                  | 0.70 | 0.81 | 1.17 | 3970.40 | 879.55  | 3407.16 | 513.19 | 2759.54 | 544.29 |
| AW049415 | Rassf1       | 102379_at   |          | Ras association (RalGDS/AF-6) domain family 1               | signal transduction                                  | 1.20 | 1.07 | 0.89 | 115.89  | 13.35   | 129.66  | 11.36  | 138.56  | 9.15   |
| D13003   | Rcn          | 160896_at   | ER       | reticulocalbin 2                                            | ER resident Ca-binding protein                       | 2.40 | 1.67 | 0.70 | 106.36  | 36.81   | 152.89  | 69.92  | 254.87  | 87.52  |
| X67812   | Ret          | 101828_at   | M        | ret proto-oncogene                                          | protein kinase receptor, signal transduction         | 1.76 | 0.83 | 1.10 | 115.11  | 11.80   | 104.92  | 11.22  | 87.25   | 15.17  |
| AV335997 | Rgs10        | 161765_f_at |          | regulator of G-protein signalling 10                        | signal transduction                                  | 1.75 | 1.44 | 0.82 | 170.75  | 29.88   | 207.46  | 13.95  | 298.41  | 124.39 |
| AF061934 | Rgs11        | 102650_at   |          | regulator of G-protein signaling 11                         | signal transduction                                  | 0.70 | 0.80 | 1.14 | 547.07  | 82.82   | 478.12  | 83.75  | 380.49  | 57.03  |
| U12403   | Rpl10a       | 100711_at   | IC       | ribosomal protein L10A                                      | translation                                          | 1.39 | 1.19 | 0.86 | 321.67  | 35.57   | 375.29  | 62.07  | 445.74  | 15.86  |
| U28917   | Rpl13        | 102109_at   | IC       | ribosomal protein L13                                       | translation                                          | 1.45 | 1.13 | 0.78 | 686.45  | 67.45   | 876.20  | 214.70 | 994.23  | 173.03 |
| AB020237 | Rpl27a; L27A | 101573_f_at | IC       | ribosomal protein L27A                                      | translation                                          | 1.52 | 1.23 | 0.81 | 802.94  | 118.33  | 993.10  | 189.15 | 1220.18 | 224.09 |
| K02928   | Rpl30        | 98119_at    | IC       | ribosomal protein L30                                       | translation                                          | 1.38 | 1.23 | 0.88 | 4567.81 | 578.59  | 5163.62 | 916.66 | 6325.97 | 906.57 |
| AW047116 | Rpl37        | 92577_f_at  | IC       | ribosomal protein L37                                       | translation                                          | 1.51 | 1.16 | 0.77 | 1241.10 | 268.40  | 1608.82 | 313.60 | 1871.42 | 295.80 |
| U29402   | Rplp1        | 100694_at   | IC       | ribosomal protein, large, P1                                | translation                                          | 1.32 | 1.11 | 0.84 | 3252.91 | 305.21  | 3854.58 | 182.18 | 4283.77 | 660.20 |
| M11408   | Rps16        | 97647_at    | IC       | S16 ribosomal protein                                       | translation                                          | 1.25 | 1.08 | 0.86 | 947.52  | 55.00   | 1097.66 | 189.72 | 1187.64 | 86.89  |
| AW048899 | Rps19        | 94068_at    | IC       | ribosomal protein S19                                       | translation                                          | 1.41 | 1.19 | 0.84 | 428.55  | 61.97   | 507.78  | 52.34  | 602.32  | 50.50  |
| AI837403 | Rps23        | 96358_at    | IC       | ribosomal protein S23                                       | translation                                          | 1.51 | 1.28 | 0.85 | 1041.42 | 83.70   | 1226.10 | 221.59 | 1568.91 | 249.66 |
| AI854238 | Rps27        | 96300_f_at  | IC       | ribosomal protein S27                                       | translation                                          | 1.63 | 1.28 | 0.78 | 1051.91 | 232.46  | 1344.24 | 251.31 | 1717.66 | 446.78 |
| X73829   | Rps8         | 100732_at   | IC       | ribosomal protein S8                                        | translation                                          | 1.29 | 1.04 | 0.81 | 1117.45 | 79.37   | 1377.55 | 198.18 | 1436.39 | 204.25 |
| M21019   | Rras         | 94394_at    | IC       | Harvey rat sarcoma oncogene, subgroup R                     | G protein signal transduction                        | 1.36 | 1.20 | 0.88 | 96.31   | 9.72    | 107.99  | 19.00  | 129.63  | 29.68  |
| L21707   | Ryk          | 160453_at   | M        | receptor-like tyrosine kinase                               | signal transduction                                  | 1.18 | 1.03 | 0.87 | 305.41  | 25.24   | 352.65  | 18.89  | 362.46  | 46.83  |
| AV007820 | S100a13      | 161121_f_at |          | S100 calcium binding protein A13                            | cell growth and/or maintenance                       | 1.92 | 1.34 | 0.70 | 352.57  | 28.25   | 505.90  | 75.51  | 677.77  | 233.71 |
| X99921   | S100a13      | 100959_at   |          |                                                             |                                                      | 1.85 | 1.30 | 0.70 | 509.36  | 75.56   | 723.12  | 161.15 | 942.88  | 234.95 |
| X66449   | S100a6       | 92770_at    |          | S100 calcium binding protein A6 (calcyclin)                 | cell growth and/or maintenance                       | 5.62 | 2.74 | 0.49 | 139.12  | 43.57   | 285.30  | 137.65 | 782.38  | 787.07 |
| U15635   | Samhd1       | 103080_at   | IC       | SAM domain and HD domain, 1                                 | signal transduction                                  | 1.19 | 1.11 | 0.93 | 96.48   | 4.18    | 104.10  | 11.03  | 115.15  | 11.58  |
| AW048916 | Sc65-pending | 100471_at   | N        | SC65 synaptonemal complex protein                           | alignment of mitotic chromosomes                     | 1.15 | 1.08 | 0.94 | 75.94   | 4.28    | 80.79   | 7.60   | 87.65   | 4.37   |
| AW046162 | Scamp2       |             |          |                                                             |                                                      |      |      |      |         |         |         |        |         |        |



|          |                     |             |       |                                                               |                                                              |      |      |      |         |        |         |        |         |        |
|----------|---------------------|-------------|-------|---------------------------------------------------------------|--------------------------------------------------------------|------|------|------|---------|--------|---------|--------|---------|--------|
| M25529   | Spi1-2              | 101575_i_at |       | serine protease inhibitor 1-2                                 | regulator of proteolysis                                     | 1.66 | 1.08 | 0.65 | 107.68  | 33.89  | 164.73  | 35.54  | 178.56  | 42.64  |
| A1838923 | Serpinb9            | 102125_f_at | IC    | serine (or cysteine) proteinase inhibitor, clade B, member 9  | regulator of intracellular proteolysis                       | 1.42 | 1.20 | 0.84 | 60.50   | 9.01   | 71.80   | 6.38   | 86.01   | 13.05  |
| X92864   | Spock1              | 161054_at   | EC    | sparc/osteonectin, cwcv and kazal-like domains proteolytic 1  | regulates cell shape & growth and ECM production             | 0.65 | 0.76 | 1.17 | 480.69  | 135.95 | 411.63  | 81.70  | 314.75  | 36.25  |
| AJ005563 | Spr2e               | 100723_f_at |       | small proline-rich protein 2E                                 | unknown                                                      | 0.79 | 0.88 | 1.11 | 2108.67 | 278.96 | 1901.55 | 247.12 | 1668.92 | 101.15 |
| A1837107 | Ssbp2               | 103504_at   | N     | single-stranded DNA binding protein 2                         | transcriptional regulation                                   | 0.63 | 0.76 | 1.21 | 1732.78 | 360.07 | 1430.08 | 193.50 | 1086.20 | 219.79 |
| U02487   | Sspn                | 102378_at   |       | sarcospan                                                     | cell growth and/or maintenance                               | 1.59 | 1.24 | 0.78 | 78.85   | 27.53  | 100.99  | 18.30  | 125.26  | 23.10  |
| AW122911 | Ssx2ip              | 96724_r_at  | CySk  | synovial sarcoma, X breakpoint 2 interacting protein          | cytoskeletal protein at cell-cell adherens junction          | 1.07 | 0.86 | 1.24 | 620.11  | 122.68 | 501.98  | 74.79  | 434.20  | 66.26  |
| AW060556 | Stab1               | 96886_at    | M     | stabilin 1                                                    | cell adhesion                                                | 1.58 | 1.21 | 0.77 | 81.48   | 6.77   | 106.45  | 27.34  | 128.91  | 9.12   |
| L47650   | Stat6               | 94331_at    | IC, N | signal transducer and activator of transcription 6            | transcription factor                                         | 1.65 | 1.34 | 0.81 | 43.61   | 5.45   | 53.68   | 13.41  | 72.06   | 28.10  |
| AA667323 | Stau1               | 103872_r_at | IC    | staufer (RNA binding protein) homolog 1 (Drosophila)          | somatodendritic transport of mRNA in neurons                 | 0.83 | 0.95 | 1.14 | 64.39   | 6.41   | 56.56   | 4.10   | 53.56   | 4.18   |
| AA822531 | Stk2                | 96130_at    | IC, N | serine/threonine kinase 2                                     | signal transduction                                          | 1.23 | 1.16 | 0.94 | 556.75  | 81.51  | 590.14  | 73.51  | 687.10  | 51.53  |
| A1838080 | Stmn1               | 97909_at    | CySk  | stathmin 1                                                    | tubulin binding protein, maintenance of axonal integrity     | 1.58 | 1.24 | 0.78 | 3319.71 | 750.83 | 4244.50 | 857.73 | 5254.97 | 540.08 |
| AF105222 | Stmn4               | 98486_at    | CySk  | stathmin-like 4                                               | tubulin binding protein                                      | 1.49 | 1.28 | 0.86 | 859.08  | 109.32 | 1000.82 | 137.06 | 1278.05 | 253.71 |
| D37793   | Syt2                | 101183_at   | IC    | synaptotagmin 2                                               | synaptic vesicle membrane, Ca-binding protein                | 0.84 | 0.95 | 1.12 | 78.81   | 8.26   | 70.07   | 3.76   | 66.39   | 5.41   |
| Z47088   | Tceb1               | 99607_at    | IC    | transcription elongation factor B (SII), polypeptide 1-like   | constituent of SCF ubiquitin ligase complex                  | 0.77 | 0.94 | 1.23 | 3039.05 | 230.22 | 2479.91 | 256.75 | 2337.46 | 460.38 |
| AJ223069 | Tcf3                | 160780_at   | IC, N | transcription factor 3                                        | transcriptional regulation                                   | 1.21 | 1.09 | 0.91 | 180.40  | 7.73   | 199.21  | 32.72  | 217.45  | 11.05  |
| AF032714 | Tdpx-ps1            | 100331_g_at |       | type II peroxiredoxin protein 2                               | transcriptional regulation                                   | 0.79 | 0.83 | 1.06 | 3822.93 | 336.87 | 3613.66 | 410.75 | 3016.82 | 586.56 |
| X72310   | Tfdp1               | 101959_r_at | IC, N | transcription factor Dp 1                                     | transcriptional regulation                                   | 1.36 | 1.19 | 0.88 | 154.33  | 10.00  | 176.01  | 21.88  | 210.24  | 41.65  |
| AF039601 | Tgfb3               | 102637_at   | M     | transforming growth factor, beta receptor III                 | signal transduction                                          | 0.81 | 0.84 | 1.04 | 135.54  | 11.61  | 130.17  | 16.02  | 109.79  | 9.57   |
| L10385   | Tgm3                | 96566_at    | EC    | transglutaminase 3, E polypeptide                             | cross-linking epidermal protein                              | 0.86 | 0.95 | 1.10 | 20.87   | 2.25   | 18.95   | 1.63   | 18.03   | 0.92   |
| M62470   | Thbs1; TSP1         | 160469_at   | EC    | thrombospondin                                                | cell adhesion                                                | 4.21 | 1.94 | 0.46 | 41.56   | 23.91  | 90.21   | 59.55  | 174.88  | 134.49 |
| U26437   | Timp3; TIMP-3       | 160519_at   | EC    | tissue inhibitor of metalloproteinases-3                      | metalloendopeptidase inhibitor                               | 1.99 | 1.28 | 0.64 | 918.63  | 247.64 | 1425.62 | 481.30 | 1831.61 | 276.97 |
| AW125880 | Tmem4               | 100039_at   | M     | transmembrane protein 4                                       | regulates neurite outgrowth                                  | 1.30 | 1.05 | 0.81 | 157.77  | 28.05  | 195.17  | 28.47  | 205.33  | 27.69  |
| A1846797 | Tmod3               | 99013_f_at  | CySk  | tropomodulin 3                                                | actin filament organization                                  | 1.59 | 1.15 | 0.72 | 1405.34 | 323.17 | 1948.56 | 668.69 | 2237.73 | 554.87 |
| AV230686 | Tnc                 | 162362_f_at | EC    | tenascin C                                                    | ECM component, determinant of synaptic plasticity            | 1.97 | 1.81 | 0.92 | 13.04   | 3.39   | 14.20   | 4.29   | 25.70   | 16.14  |
| X87128   | Tnfrsf1b; p75       | 94928_at    | M     | p75 TNF receptor                                              | signal transduction, neurotransmitter release, apoptosis     | 1.31 | 1.19 | 0.91 | 72.35   | 3.31   | 79.84   | 13.56  | 94.75   | 15.63  |
| D38046   | Top2b               | 99462_at    | N     | topoisomerase (DNA) II beta                                   | DNA topological change                                       | 1.58 | 1.42 | 0.90 | 77.46   | 24.03  | 86.28   | 18.35  | 122.18  | 20.77  |
| AF004428 | Tpd52l1             | 101446_at   | N     | tumor protein D52-like 1                                      | (dis)assembly of endosomal SNARE complexes                   | 0.26 | 0.49 | 1.86 | 256.77  | 181.92 | 138.38  | 77.75  | 67.58   | 10.80  |
| A1835558 | Tpm4                | 95542_at    | CySk  | tropomyosin 4                                                 | actin organization                                           | 2.17 | 1.55 | 0.71 | 375.75  | 120.52 | 527.02  | 133.91 | 815.36  | 283.61 |
| AW060819 | Twg-pending         | 102032_at   | EC    | twisted gastrulation protein                                  | signal transduction                                          | 1.76 | 1.32 | 0.75 | 186.04  | 35.20  | 247.34  | 102.36 | 326.68  | 90.52  |
| M63649   | Twist1; Pde; M-Twis | 98029_at    | N     | Mouse M-twist gene, complete cds.                             | transcriptional regulation                                   | 1.46 | 1.20 | 0.82 | 45.12   | 4.01   | 54.73   | 9.30   | 65.74   | 13.42  |
| AW125643 | Ubce2ip5-pending    | 104157_at   | IC    | ubiquitin-conjugating enzyme 7 interacting protein 5          | ubiquitin-dependent protein catabolism                       | 0.85 | 0.87 | 1.02 | 62.58   | 5.81   | 61.48   | 6.32   | 53.23   | 3.87   |
| U82627   | Ube2l               | 97530_at    | IC    | ubiquitin-conjugating enzyme E2l                              | ubiquitin-dependent protein catabolism                       | 1.18 | 1.04 | 0.86 | 237.94  | 17.33  | 339.79  | 38.75  | 352.10  | 13.39  |
| AW125420 | Ubcn1               | 95601_at    | IC    | ubiquitin 1                                                   | ubiquitin-dependent protein catabolism                       | 0.74 | 0.87 | 1.19 | 287.67  | 34.87  | 242.23  | 9.91   | 211.44  | 32.76  |
| AF115848 | Unc13h1             | 92498_at    | IC    | unc13 homolog (C. elegans)                                    | regulates SNARE complex assembly                             | 1.19 | 1.12 | 0.94 | 15.70   | 1.37   | 16.76   | 2.28   | 18.73   | 1.13   |
| AF053724 | Vamp8               | 93305_f_at  | IC    | vesicle-associated membrane protein 8                         | functions as vesicle SNARE in vesicle trafficking            | 1.54 | 1.10 | 0.71 | 125.43  | 25.47  | 176.33  | 61.44  | 193.64  | 28.74  |
| W65964   | VAT; VACHT          | 100345_f_at | M     | vesicular acetylcholine transporter                           | neurotransmitter transport                                   | 1.47 | 1.10 | 0.75 | 763.58  | 85.78  | 1018.27 | 304.50 | 1120.30 | 133.21 |
| AF019045 | VAT; VACHT          | 101354_at   | M     | vesicular acetylcholine transporter                           | neurotransmitter transport                                   | 0.27 | 0.37 | 1.35 | 541.45  | 391.16 | 400.26  | 315.44 | 147.44  | 28.89  |
| M84487   | Vcam1               | 92558_at    | M, EC | vascular cell adhesion molecule 1                             | cell adhesion; signal transduction                           | 2.30 | 1.47 | 0.64 | 158.34  | 45.33  | 248.22  | 116.25 | 364.60  | 136.38 |
| U12884   | Vcam1               | 92559_at    | M, EC | vascular cell adhesion molecule 1                             | cell adhesion; signal transduction                           | 2.19 | 1.50 | 0.68 | 21.60   | 2.32   | 31.59   | 11.55  | 47.40   | 26.30  |
| A1843063 | Vwf                 | 103499_at   | EC    | Von Willebrand factor homolog                                 | blood coagulation                                            | 3.28 | 1.68 | 0.51 | 168.21  | 106.58 | 327.83  | 189.37 | 552.33  | 238.94 |
| AF071186 | Wbp11               | 98617_at    | IC, N | WW domain binding protein 11                                  | mRNA splicing factor, protein phosphatase-1 interactions     | 0.86 | 0.94 | 1.09 | 532.15  | 40.70  | 487.49  | 35.45  | 459.02  | 45.54  |
| AF084482 | Wfs1                | 103824_at   | EC    | Wolfram syndrome 1 homolog (human)                            | unknown                                                      | 0.48 | 0.54 | 1.14 | 1700.79 | 831.68 | 1493.53 | 375.81 | 813.85  | 211.16 |
| M89800   | Wnt6                | 103735_at   | ER    | wingless-related MMTV integration site 6                      | signaling peptide                                            | 1.30 | 1.06 | 0.81 | 68.05   | 8.36   | 83.81   | 14.10  | 88.75   | 12.29  |
| AA880988 | Xlkd1               | 160583_at   | M     | extra cellular link domain-containing 1                       | glycosaminoglycan catabolism, cell adhesion, signaling       | 1.43 | 1.21 | 0.85 | 39.10   | 6.25   | 46.27   | 10.34  | 55.94   | 10.43  |
| X80508   | Yap                 | 160520_at   | IC    | yes-associated protein                                        | TGF-beta growth factor signal transduction                   | 1.65 | 1.17 | 0.71 | 251.13  | 59.14  | 355.55  | 130.72 | 415.99  | 62.64  |
| A1842472 | Zdhhc14             | 104299_at   | N     | zinc finger, DHHC domain containing 14                        | unknown                                                      | 1.38 | 1.17 | 0.85 | 113.94  | 8.72   | 134.82  | 16.71  | 157.31  | 35.12  |
| M58566   | Zfp36l1             | 93324_at    | N     | zinc finger protein 36, C3H type-like 1                       | putative transcription factor, immediate early response gene | 1.99 | 1.26 | 0.63 | 201.06  | 61.41  | 318.14  | 93.10  | 400.01  | 121.97 |
| C77776   |                     | 101226_at   |       | ESTs                                                          |                                                              | 0.86 | 0.96 | 1.12 | 140.78  | 15.97  | 125.27  | 6.94   | 120.86  | 9.34   |
| A1573367 |                     | 104056_at   |       | Mus musculus, clone IMAGE:5322989, mRNA                       |                                                              | 1.53 | 1.20 | 0.78 | 462.17  | 132.94 | 589.45  | 135.09 | 708.73  | 115.71 |
| A1463656 |                     | 98849_at    |       | ESTs                                                          |                                                              | 1.29 | 1.16 | 0.90 | 128.08  | 21.04  | 142.87  | 21.71  | 165.29  | 22.47  |
| A1845854 |                     | 96305_at    |       | Mus musculus, IMAGE:3594956, mRNA                             |                                                              | 0.90 | 0.91 | 1.02 | 96.84   | 7.13   | 95.10   | 5.75   | 86.96   | 4.24   |
| AV115928 |                     | 161659_f_at |       | ESTs                                                          |                                                              | 0.87 | 0.93 | 1.07 | 49.51   | 2.90   | 46.18   | 4.48   | 43.12   | 3.15   |
| A1848479 |                     | 98524_f_at  |       | Mus musculus cDNA clone U1-M-AP1-agf-a-10-0-UI                |                                                              | 1.37 | 1.19 | 0.86 | 86.05   | 9.50   | 99.68   | 16.08  | 118.18  | 23.21  |
| AV251613 |                     | 96481_at    |       | A330078N12, hypothetical Na+/H+ exchanger                     |                                                              | 1.35 | 1.28 | 0.95 | 49.78   | 7.79   | 52.67   | 5.34   | 67.24   | 12.19  |
| AA684508 |                     | 97838_at    |       | clone:A730062M15                                              |                                                              | 1.47 | 1.23 | 0.84 | 194.59  | 32.77  | 232.72  | 46.74  | 286.49  | 52.50  |
| A1835315 |                     | 94823_at    |       | clone IMAGE:3586350,                                          |                                                              | 1.34 | 1.16 | 0.87 | 978.98  | 112.99 | 1130.23 | 143.95 | 1313.27 | 190.35 |
| A1843358 |                     | 103565_at   |       | clone:A930010M14 product:PRP31                                |                                                              | 1.24 | 1.10 | 0.89 | 234.64  | 18.41  | 264.66  | 17.00  | 290.12  | 35.53  |
| AA960603 |                     | 160273_at   |       | Mus musculus Brf2 gene, 3' UTR                                |                                                              | 2.09 | 1.43 | 0.69 | 297.03  | 57.68  | 432.56  | 136.28 | 620.13  | 209.02 |
| A1117936 |                     | 104300_at   |       | clone:6230409N14                                              |                                                              | 2.09 | 1.39 | 0.67 | 168.30  | 31.00  | 252.65  | 100.05 | 352.41  | 128.97 |
| AA795285 |                     | 104255_at   |       | ESTs                                                          |                                                              | 0.68 | 0.81 | 1.19 | 314.01  | 51.67  | 264.68  | 38.73  | 214.99  | 28.45  |
| AA209597 |                     | 161096_at   |       | Similar to zinc finger protein, clone MGC:51479 IMAGE:4012958 |                                                              | 1.20 | 1.08 | 0.90 | 136.88  | 9.40   | 152.29  | 13.34  | 164.81  | 9.03   |
| A1835359 | O610038P07Rik       | 96007_at    |       | RIKEN cDNA O610038P07 gene                                    |                                                              | 1.38 | 1.19 | 0.86 | 1088.24 | 177.72 | 1266.18 | 263.73 | 1503.19 | 200.90 |
| A1853364 | 0710001O03Rik       | 160391_at   |       | RIKEN cDNA 0710001O03 gene                                    |                                                              | 1.47 | 1.14 | 0.78 | 533.17  | 138.17 | 684.35  | 148.67 | 782.17  | 69.44  |
| AW121947 | 1100001I22Rik       | 96307_s_at  |       | RIKEN cDNA 1100001I22 gene                                    |                                                              | 1.33 | 1.22 | 0.91 | 3301.40 | 432.63 | 3619.64 | 439.86 | 4403.08 | 628.17 |
| A1837621 | 1100001I23Rik       | 95120_at    |       | RIKEN cDNA 1100001I23 gene                                    |                                                              | 0.66 | 0.92 | 1.40 | 454.45  | 122.61 | 323.76  | 82.50  | 298.10  | 61.99  |
| AW047554 | 1110001I14Rik       | 104605_at   |       | RIKEN cDNA 1110001I14 gene                                    |                                                              | 1.30 | 1.08 | 0.83 | 522.10  | 107.41 | 628.48  | 67.69  | 679.85  | 75.86  |
| A1848584 | 1110002B05Rik       | 96862_at    |       | RIKEN cDNA 1110002B05 gene                                    |                                                              | 2.01 | 1.54 | 0.77 | 638.77  | 199.53 | 832.11  | 335.04 | 1284.74 | 327.31 |
| A1846118 | 1110014K08Rik       | 98910_at    |       | RIKEN cDNA 1110014K08 gene                                    |                                                              | 1.19 | 1.10 | 0.92 | 607.71  | 38.65  | 659.93  | 36.71  | 725.41  | 84.75  |
| AW230977 | 1110017N23Rik       | 103739_at   |       | RIKEN cDNA 1110017N23 gene                                    |                                                              | 1.88 | 1.42 | 0.75 | 161.87  | 41.75  | 214.95  | 50.37  | 304.96  | 87.72  |
| A1836568 | 1110018O08Rik       | 95138_at    |       | RIKEN cDNA 1110018O08 gene                                    |                                                              | 1.27 | 1.11 | 0.87 | 226.00  | 31.76  | 258.38  | 28.32  | 298.07  | 22.34  |
| A1843359 |                     |             |       |                                                               |                                                              |      |      |      |         |        |         |        |         |        |

|          |               |             |                                                 |      |      |      |         |        |         |         |         |        |
|----------|---------------|-------------|-------------------------------------------------|------|------|------|---------|--------|---------|---------|---------|--------|
| AW048347 | 2210023F24Rik | 93187_at    | RIKEN cDNA 2210023F24 gene                      | 1.14 | 1.02 | 0.90 | 140.82  | 14.73  | 156.82  | 11.33   | 160.46  | 9.83   |
| AI852704 | 2210402G22Rik | 97484_at    | RIKEN cDNA 2210402G22 gene                      | 1.39 | 1.07 | 0.77 | 578.87  | 145.91 | 749.39  | 141.47  | 805.10  | 58.74  |
| AI834777 | 2210419D22Rik | 93877_at    | RIKEN cDNA 2210419D22 gene                      | 1.29 | 1.12 | 0.87 | 361.11  | 24.22  | 416.56  | 80.99   | 465.19  | 60.89  |
| AF034580 | 2310008H09Rik | 160872_f_at | RIKEN cDNA 2310008H09 gene                      | 0.67 | 0.79 | 1.19 | 135.89  | 23.08  | 114.66  | 20.68   | 91.03   | 11.37  |
| AI131744 | 2310009E04Rik | 102783_at   | RIKEN cDNA 2310009E04 gene                      | 0.90 | 0.95 | 1.06 | 439.24  | 34.34  | 414.34  | 19.75   | 393.13  | 17.89  |
| AI661590 | 2310010J17Rik | 161018_at   | RIKEN cDNA 2310010J17 gene                      | 1.26 | 1.14 | 0.90 | 81.55   | 4.71   | 90.58   | 5.33    | 103.10  | 18.84  |
| AI834895 | 2310021M12Rik | 99142_at    | RIKEN cDNA 2310021M12 gene                      | 0.83 | 0.86 | 1.03 | 932.32  | 53.85  | 903.54  | 109.08  | 776.18  | 60.27  |
| AW125284 | 2310032D16Rik | 98942_r_at  | RIKEN cDNA 2310032D16 gene                      | 0.60 | 0.81 | 1.35 | 491.02  | 131.11 | 362.82  | 83.21   | 295.54  | 70.60  |
| AI841777 | 2310036D04Rik | 104320_at   | RIKEN cDNA 2310036D04 gene                      | 1.50 | 1.19 | 0.80 | 489.62  | 71.73  | 614.85  | 119.22  | 732.15  | 223.24 |
| AV369210 | 2310046B19Rik | 162034_r_at | RIKEN cDNA 2310046B19 gene                      | 1.16 | 1.11 | 0.95 | 12.04   | 0.50   | 12.62   | 0.78    | 14.02   | 1.00   |
| AW125329 | 2310057D15Rik | 160067_at   | RIKEN cDNA 2310057D15 gene                      | 1.39 | 1.33 | 0.95 | 306.71  | 68.29  | 321.26  | 62.72   | 426.53  | 82.97  |
| AF003352 | 2400010D15Rik | 160433_at   | RIKEN cDNA 2400010D15 gene                      | 0.81 | 0.91 | 1.12 | 333.84  | 40.25  | 298.92  | 37.01   | 271.75  | 18.27  |
| AI849500 | 2410004C24Rik | 97891_at    | RIKEN cDNA 2410004C24 gene                      | 0.80 | 0.96 | 1.20 | 320.55  | 33.95  | 267.31  | 38.42   | 256.18  | 32.99  |
| AV207612 | 2410004C24Rik | 161135_f_at | RIKEN cDNA 2410004C24 gene                      | 0.69 | 0.89 | 1.29 | 351.86  | 70.25  | 273.14  | 38.24   | 243.73  | 49.43  |
| AI853219 | 2410012H22Rik | 93138_at    | RIKEN cDNA 2410012H22 gene                      | 0.76 | 0.80 | 1.06 | 217.67  | 16.30  | 205.68  | 31.13   | 164.64  | 27.27  |
| AW124778 | 2610034N03Rik | 97247_at    | RIKEN cDNA 2610034N03 gene                      | 0.62 | 0.81 | 1.29 | 1640.75 | 449.22 | 1268.31 | 476.22  | 1021.19 | 153.25 |
| AW045664 | 2810026P18Rik | 104089_at   | RIKEN cDNA 2810026P18 gene                      | 1.74 | 1.45 | 0.83 | 65.73   | 17.05  | 78.98   | 20.75   | 114.19  | 32.28  |
| AI845988 | 2810404F18Rik | 95153_at    | RIKEN cDNA 2810404F18 gene                      | 1.30 | 1.11 | 0.85 | 350.21  | 75.44  | 409.65  | 36.98   | 455.70  | 33.29  |
| AI853616 | 2810422B04Rik | 160400_at   | RIKEN cDNA 2810422B04 gene                      | 0.75 | 0.84 | 1.12 | 470.61  | 47.14  | 419.39  | 70.07   | 353.81  | 23.86  |
| AI414025 | 2900016D05Rik | 104502_f_at | RIKEN cDNA 2900016D05 gene                      | 1.27 | 1.12 | 0.88 | 217.85  | 14.06  | 247.27  | 17.94   | 276.05  | 50.52  |
| AI844890 | 2900053E13Rik | 160284_at   | RIKEN cDNA 2900053E13 gene                      | 0.84 | 0.89 | 1.06 | 382.83  | 30.84  | 361.07  | 28.92   | 321.58  | 24.72  |
| AA833293 | 3110052D19Rik | 104415_at   | RIKEN cDNA 3110052D19 gene                      | 1.18 | 1.03 | 0.87 | 108.01  | 4.30   | 123.74  | 9.24    | 127.92  | 14.62  |
| AA930526 | 4833411B01Rik | 104427_at   | RIKEN cDNA 4833411B01 gene                      | 1.55 | 1.21 | 0.78 | 385.13  | 43.54  | 495.13  | 71.29   | 598.03  | 106.72 |
| AV254726 | 4921513E08Rik | 98326_f_at  | RIKEN cDNA 4921513E08 gene                      | 0.87 | 0.94 | 1.08 | 28.22   | 1.07   | 26.15   | 1.87    | 24.53   | 1.05   |
| AI647612 | 5031439A09Rik | 101001_at   | RIKEN cDNA 5031439A09 gene                      | 2.12 | 1.25 | 0.59 | 315.25  | 131.09 | 535.86  | 233.58  | 669.71  | 158.45 |
| AI846906 | 5033414D02Rik | 98495_at    | RIKEN cDNA 5033414D02 gene                      | 1.15 | 1.10 | 0.95 | 114.84  | 7.96   | 120.32  | 3.17    | 132.62  | 12.78  |
| AI843709 | 5133400A03Rik | 94345_at    | RIKEN cDNA 5133400A03 gene                      | 1.87 | 1.30 | 0.69 | 178.51  | 53.22  | 256.97  | 120.33  | 333.22  | 61.64  |
| AI426400 | 5430401D19Rik | 97357_at    | RIKEN cDNA 5430401D19 gene                      | 1.28 | 1.23 | 0.96 | 29.14   | 2.89   | 30.43   | 6.14    | 37.28   | 2.63   |
| AI851345 | 5730591C18Rik | 160385_at   | RIKEN cDNA 5730591C18 gene                      | 0.77 | 0.85 | 1.10 | 331.56  | 25.56  | 300.82  | 42.47   | 256.14  | 23.44  |
| AW048944 | 6330514M23Rik | 97496_f_at  | RIKEN cDNA 6330514M23 gene                      | 1.39 | 1.08 | 0.77 | 229.92  | 21.76  | 297.28  | 70.61   | 319.95  | 28.44  |
| AI842002 | 6530413N01Rik | 99553_f_at  | RIKEN cDNA 6530413N01 gene                      | 1.40 | 1.17 | 0.84 | 155.78  | 15.96  | 186.25  | 18.67   | 217.96  | 50.50  |
| AA790291 | 9130208G10    | 103786_at   | hypothetical protein 9130208G10                 | 0.86 | 0.96 | 1.11 | 89.27   | 6.63   | 80.51   | 5.44    | 76.92   | 5.17   |
| AI854482 | 9130229H14Rik | 102395_at   | RIKEN cDNA 9130229H14 gene                      | 0.75 | 0.88 | 1.18 | 607.49  | 106.03 | 513.82  | 49.67   | 453.67  | 71.25  |
| AW215585 | 9130422G05Rik | 102920_at   | RIKEN cDNA 9130422G05 gene                      | 0.65 | 0.69 | 1.07 | 968.59  | 240.73 | 907.88  | 207.86  | 628.85  | 115.02 |
| AW048661 | 9330140I15Rik | 94991_at    | RIKEN cDNA 9330140I15 gene                      | 1.80 | 1.38 | 0.77 | 35.24   | 6.72   | 46.02   | 14.44   | 63.32   | 21.32  |
| AI593759 | 9530051K01Rik | 98346_at    | RIKEN cDNA 9530051K01 gene                      | 1.11 | 1.07 | 0.96 | 84.38   | 1.86   | 87.89   | 2.20    | 93.88   | 6.43   |
| AI839880 | A230070D14Rik | 93147_f_at  | RIKEN cDNA A230070D14 gene                      | 1.45 | 1.31 | 0.91 | 844.53  | 216.04 | 929.52  | 192.11  | 1221.46 | 247.90 |
| AA623587 | AA536743      | 97918_at    | expressed sequence AA536743                     | 1.80 | 1.28 | 0.71 | 103.31  | 15.75  | 145.95  | 37.96   | 186.27  | 50.32  |
| AA657044 | AA589382      | 160255_at   | expressed sequence AA589382                     | 3.31 | 1.73 | 0.52 | 784.71  | 517.96 | 1503.67 | 1048.40 | 2594.26 | 783.76 |
| AI553536 | E030024M05Rik | 99366_at    | RIKEN cDNA E030024M05 gene                      | 3.47 | 2.02 | 0.58 | 78.65   | 20.82  | 135.29  | 76.12   | 273.05  | 256.09 |
| AA711773 | E430013J17Rik | 103200_at   | RIKEN cDNA E430013J17 gene                      | 1.42 | 1.35 | 0.95 | 40.28   | 5.37   | 42.48   | 8.18    | 57.35   | 14.45  |
| AW120628 | D10Erd73e     | 95161_at    | DNA segment, Chr 10, ERATO Doi 73, expressed    | 1.22 | 1.09 | 0.90 | 372.80  | 30.18  | 416.25  | 51.31   | 455.52  | 26.19  |
| AA915342 | D11Erd603e    | 96932_at    | DNA segment, Chr 11, ERATO Doi 603, expressed   | 0.88 | 0.94 | 1.08 | 325.85  | 14.43  | 302.98  | 29.41   | 285.94  | 15.26  |
| AW125724 | D13Vsu50e     | 94502_at    | DNA segment, Chr 13, Wayne State University 50  | 0.70 | 0.83 | 1.18 | 254.22  | 39.78  | 216.25  | 13.94   | 174.73  | 39.60  |
| AW047083 | D19Vsu162e    | 96829_at    | DNA segment, Chr 19, Wayne State University 162 | 1.25 | 1.07 | 0.86 | 228.84  | 25.78  | 267.62  | 29.60   | 285.54  | 15.19  |
| C77922   | D1Erd75e      | 97140_at    | ESTs                                            | 0.91 | 0.96 | 1.05 | 45.16   | 2.91   | 43.12   | 1.99    | 41.23   | 1.46   |
| N28141   | D6Bwg1452e    | 99779_at    | ESTs                                            | 0.86 | 0.91 | 1.06 | 96.23   | 6.33   | 90.54   | 5.75    | 82.47   | 4.46   |
| AV230529 | D7Erd743e     | 161979_f_at | DNA segment, Chr 7, ERATO Doi 743, expressed    | 0.90 | 0.96 | 1.07 | 14.33   | 0.60   | 13.35   | 0.90    | 12.88   | 0.57   |
| AW125274 | D8Erd354e     | 97863_at    | cDNA clone UI-M-BH2.1-aps-h-08-0-UI             | 0.78 | 0.83 | 1.06 | 887.04  | 79.92  | 833.28  | 68.27   | 688.54  | 109.76 |
| AI841487 | C330016O16Rik | 102702_at   | RIKEN cDNA C330016O16 gene                      | 1.35 | 1.16 | 0.86 | 85.22   | 7.38   | 98.68   | 12.30   | 114.74  | 24.26  |
| AI840339 | C730049F20Rik | 96038_at    | RIKEN cDNA C730049F20 gene                      | 1.81 | 1.28 | 0.71 | 42.05   | 9.78   | 59.45   | 30.91   | 76.05   | 16.15  |
| AI835706 | MGC18837      | 95442_at    | hypothetical protein MGC18837                   | 0.82 | 0.90 | 1.10 | 1045.72 | 58.59  | 949.53  | 108.65  | 855.08  | 83.89  |

Class VI: Genes that are differentially expressed between MMN and IML (42)

| Genbank  | Common             | Probeset    | location | Description                                              | Function                                               | Fold changes* |         |         | Average Signal Intensities & Standard Deviations |        |         |        |         |        |
|----------|--------------------|-------------|----------|----------------------------------------------------------|--------------------------------------------------------|---------------|---------|---------|--------------------------------------------------|--------|---------|--------|---------|--------|
|          |                    |             |          |                                                          |                                                        | IML/LMN       | IML/MMN | LMN/MMN | LMN                                              | SD     | MMN     | SD     | IML     | SD     |
| U96401   | Aldh1a7            | 94778_at    |          | aldehyde dehydrogenase family 1, subfamily A7            | metabolism                                             | 0.78          | 0.67    | 0.87    | 112.25                                           | 13.96  | 129.72  | 34.62  | 87.20   | 9.62   |
| M31690   | Ass1               | 97521_at    |          | argininosuccinate synthetase 1                           | arginine biosynthesis                                  | 1.07          | 1.23    | 1.15    | 235.60                                           | 28.87  | 204.15  | 16.35  | 251.97  | 31.36  |
| AF068182 | Blnk               | 100772_g_at | M        | B-cell linker                                            | signal transduction                                    | 1.17          | 1.21    | 1.04    | 16.13                                            | 0.90   | 15.52   | 0.65   | 18.80   | 2.98   |
| GX2502   | Ccl4; Act-2; Mip1b | 94146_at    | EC       | chemokine (C-C motif) ligand 4                           | signal transduction                                    | 1.03          | 1.08    | 1.05    | 116.68                                           | 2.92   | 111.55  | 3.04   | 120.69  | 5.58   |
| L34808   | Chx10              | 101127_at   | N        | C. elegans ceh-10 homeo domain containing homolog        | transcription factor                                   | 1.12          | 1.26    | 1.12    | 120.55                                           | 16.60  | 107.71  | 7.41   | 135.28  | 18.92  |
| U92702   | Ebf3               | 104482_at   | N        | early B-cell factor 3                                    | transcription factor                                   | 1.13          | 1.21    | 1.07    | 100.09                                           | 6.31   | 93.41   | 11.95  | 112.62  | 11.18  |
| L38580   | Gal; Galn          | 100407_at   | EC       | galanin neuropeptide                                     | neuropeptide signal transduction                       | 1.21          | 1.28    | 1.06    | 214.48                                           | 10.75  | 202.41  | 6.20   | 259.99  | 52.94  |
| U68564   | ldh3g              | 93029_at    | mit      | isocitrate dehydrogenase 3 (NAD+), gamma                 | TCA cycle                                              | 0.79          | 0.73    | 0.93    | 1028.78                                          | 122.01 | 1111.88 | 151.23 | 815.45  | 222.91 |
| U53219   | Igtp               | 160933_at   | IC       | interferon gamma induced GTPase                          | G protein signal transduction                          | 1.09          | 1.16    | 1.06    | 41.62                                            | 1.62   | 39.11   | 3.85   | 45.25   | 3.69   |
| D13695   | Il1r1              | 98500_at    | M        | interleukin 1 receptor-like 1                            | signal transduction, synaptic plasticity               | 1.14          | 1.24    | 1.09    | 18.46                                            | 1.25   | 16.99   | 0.80   | 21.10   | 4.27   |
| M29697   | Il7r               | 99030_at    | M        | interleukin 7 receptor                                   | cell surface receptor linked signal transduction       | 1.14          | 1.20    | 1.05    | 20.22                                            | 2.09   | 19.20   | 1.31   | 22.99   | 3.12   |
| AJ001373 | Igfb1bp1           | 100899_at   | IC       | integrin beta 1 binding protein 1                        | integrin dependent cell-matrix adhesion                | 0.91          | 0.85    | 0.94    | 485.02                                           | 15.89  | 517.71  | 49.39  | 439.27  | 31.24  |
| AW120557 | Lsm4               | 93008_at    | N        | U6 snRNA-associated SM-like protein 4                    | component of the spliceosome complex                   | 0.87          | 0.77    | 0.89    | 376.43                                           | 34.42  | 422.81  | 69.16  | 326.76  | 36.14  |
| AI843685 | Mrp15              | 96296_at    | mit      | mitochondrial ribosomal protein L15                      | mitochondrial protein biosynthesis                     | 0.87          | 0.83    | 0.96    | 225.16                                           | 23.69  | 233.77  | 29.63  | 195.01  | 14.93  |
| L00039   | Myc; Myc2; Nird    | 104712_at   | N        | c-myc (Myc) gene                                         | transcriptional regulation                             | 1.14          | 1.17    | 1.02    | 13.03                                            | 1.05   | 12.73   | 0.41   | 14.87   | 1.68   |
| AI848871 | Ndutb10            | 101525_at   | mit      | NADH dehydrogenase (ubiquinone) 1 beta subcomplex, 10    | electron transport                                     | 0.79          | 0.75    | 0.95    | 591.41                                           | 58.71  | 623.05  | 128.70 | 466.93  | 71.83  |
| X76653   | Nr2f2              | 103052_r_at | N        | nuclear receptor subfamily 2, group F, member 2          | steroid hormone receptor, transcription factor         | 1.19          | 1.53    | 1.28    | 103.50                                           | 22.96  | 80.56   | 24.78  | 123.20  | 14.37  |
| X80937   | Ralbp1             | 93255_at    | M        | ralA binding protein 1                                   | Ral G protein effector, regulates receptor endocytosis | 1.13          | 1.20    | 1.06    | 889.23                                           | 38.87  | 841.76  | 66.19  | 1008.02 | 151.95 |
| AB026583 | Rbms2              | 92517_at    | IC       | RNA binding motif, single stranded interacting protein 2 | transcriptional and/or translational regulator         | 0.86          | 0.82    | 0.95    | 137.54                                           | 13.72  | 144.50  | 16.15  | 118.62  | 10.23  |
| U85055   | Rgs14              | 102711_at   | N        | regulator of G-protein signaling 14                      | G protein signal transduction                          | 1.08          | 1.12    | 1.04    | 217.03                                           | 10.01  | 207.87  | 7.07   | 233.55  | 21.41  |
| U66918   | Shox2              | 99042_s_at  | N        | short stature homeobox 2                                 | transcription factor                                   | 1.20          | 1.26    | 1.05    | 65.47                                            | 6.34   | 62.58   | 5.06   | 78.82   | 14.29  |
| U10404   | Slc25a5            | 100617_at   | mit      | solute carrier family 25, member 5                       | adenine nucleotide translocator                        | 0.92          | 0.89    | 0.97    | 115.25                                           | 4.61   | 118.72  | 6.28   | 105.67  | 8.14   |
| U79550   | Snaiz              | 99552_at    | N        | snail homolog 2 (Drosophila)                             | transcription factor                                   | 1.20          | 1.24    | 1.03    | 231.19                                           | 20.76  | 224.08  | 13.26  | 277.30  | 48.40  |
| AF068748 | Sphk1              | 103839_at   | IC, M    | sphingosine kinase 1                                     | sphingolipid metabolism                                | 0.90          | 0.80    | 0.89    | 181.72                                           | 17.76  | 204.15  | 21.66  | 162.96  | 14.42  |
| Y09972   | Taf1a              | 92339_at    | N        | TATA box binding protein-associated factor, RNA Pol I, A | transcriptional regulator for Pol I                    | 0.88          | 0.87    | 1.00    | 324.37                                           | 38.37  | 325.79  | 10.24  | 284.45  | 19.42  |
| D86081   | Tcea2              | 104622_at   | N        | transcription elongation factor A (SII), 2               | regulation of transcription                            | 0.83          | 0.73    | 0.88    | 258.88                                           | 54.90  | 294.32  | 28.47  | 216.10  | 42.24  |

|          |               |               |             |                                 |      |      |      |         |        |         |        |         |        |
|----------|---------------|---------------|-------------|---------------------------------|------|------|------|---------|--------|---------|--------|---------|--------|
| AW061299 | Igsf8         | 160820_at     |             | clone UI-M-BH1-anw-c-06-0-UI    | 1.29 | 1.20 | 0.93 | 876.77  | 91.08  | 945.47  | 131.81 | 1132.49 | 129.17 |
| AW120867 | 1700013H19Rik | 95561_at      |             | RIKEN cDNA 1700013H19 gene      | 1.05 | 1.08 | 1.03 | 9.91    | 0.43   | 9.65    | 0.41   | 10.43   | 0.53   |
| AW049360 | 1700017B05Rik | 104389_at     |             | clone UI-M-BH1-ane-a-10-0-UI    | 1.90 | 0.88 | 0.98 | 117.97  | 5.90   | 120.40  | 9.65   | 106.43  | 7.06   |
|          | L04848        | 1700029H17Rik | 103847_at   | RIKEN cDNA 1700029H17 gene      | 1.07 | 1.16 | 1.08 | 35.43   | 1.68   | 32.87   | 1.67   | 38.06   | 2.89   |
|          | AI835060      | 1810013D10Rik | 97265_at    | RIKEN cDNA 1810013D10 gene      | 0.84 | 0.82 | 0.98 | 533.59  | 57.27  | 546.25  | 53.42  | 447.33  | 58.93  |
|          | AV364118      | 9430015G03Rik | 161792_f_at | RIKEN cDNA 9430015G03 gene      | 1.10 | 1.15 | 1.04 | 10.68   | 0.75   | 10.27   | 0.49   | 11.79   | 1.05   |
|          | AI843294      | C330006A16Rik | 95604_at    | RIKEN cDNA C330006A16 gene      | 0.95 | 0.88 | 0.92 | 1932.13 | 158.52 | 2089.64 | 148.59 | 1833.68 | 96.81  |
|          | AW123987      | D15Ert8785e   | 160292_at   | clone UI-M-BH2.3-acq-g-08-0-UI  | 0.85 | 0.81 | 0.95 | 360.64  | 29.22  | 380.82  | 52.56  | 307.14  | 42.73  |
|          | AA407378      | D8Wsu26e      | 94657_at    | ESTs                            | 1.06 | 1.07 | 1.01 | 10.60   | 0.40   | 10.50   | 0.42   | 11.19   | 0.42   |
|          | AW048729      | E430023I20    | 104200_at   | hypothetical protein E430023I20 | 0.90 | 0.80 | 0.89 | 517.10  | 45.58  | 580.58  | 77.71  | 463.53  | 46.27  |
|          | AA881294      | LOC218699     | 97325_at    | similar to CG8726 gene product  | 0.84 | 0.78 | 0.92 | 496.24  | 28.15  | 538.49  | 96.57  | 417.82  | 60.54  |
|          | AV366522      | LOC231430     | 162029_r_at | hypothetical protein LOC231430  | 1.04 | 1.10 | 1.05 | 13.08   | 0.72   | 12.42   | 0.62   | 13.64   | 0.58   |

Class VII: Genes that are differentially expressed between LMN and MMN (61)

| Genbank  | Common         | Probeset       | Location    | Description                                         | Function                                                      | Fold changes*                        |         |         | Average Signal Intensities & Standard Deviations |         |        |         |        |         |        |
|----------|----------------|----------------|-------------|-----------------------------------------------------|---------------------------------------------------------------|--------------------------------------|---------|---------|--------------------------------------------------|---------|--------|---------|--------|---------|--------|
|          |                |                |             |                                                     |                                                               | IML/LMN                              | IML/MMN | LMN/MMN | LMN                                              |         | MMN    |         | IML    |         |        |
|          |                |                |             |                                                     |                                                               | Average                              | SD      | Average | SD                                               | Average | SD     | Average | SD     |         |        |
| AF004108 | Aanat          | 92512_g_at     |             | arylalkylamine N-acetyltransferase                  | acyltransferase, penultimate enzyme in melatonin synthesis    | 0.93                                 | 1.01    | 1.09    | 904.34                                           | 38.22   | 829.91 | 34.47   | 841.62 | 53.59   |        |
|          | X13297         | Acta2          | 93100_at    | CySk                                                | actin, alpha 2, smooth muscle, aorta                          | 3.47                                 | 0.73    | 0.21    | 178.52                                           | 213.79  | 841.89 | 582.42  | 618.77 | 789.78  |        |
|          | M92850         | Aeg2           | 94730_at    | IC, EC                                              | acidic epididymal glycoprotein 2                              | 1.05                                 | 0.97    | 0.93    | 8.68                                             | 0.22    | 9.35   | 0.34    | 9.10   | 0.41    |        |
| AF103809 | Ap3b1          | 103878_at      | G           | adaptor-related protein complex 3, beta 1 subunit   | trafficking in endomembrane system                            | 1.24                                 | 0.93    | 0.75    | 485.32                                           | 78.73   | 649.88 | 75.97   | 603.31 | 63.98   |        |
|          | D87899         | Arf2           | 100518_at   | G                                                   | ADP-ribosylation factor 2                                     | 0.91                                 | 1.04    | 1.14    | 137.58                                           | 8.54    | 120.53 | 5.77    | 124.76 | 12.77   |        |
|          | X97991         | Calca          | 92533_at    | IC                                                  | calcitonin/calcitonin-related polypeptide, alpha              | 0.93                                 | 1.02    | 1.10    | 117.83                                           | 6.75    | 106.82 | 5.41    | 109.17 | 5.06    |        |
| AB019600 | Casp9          | 100367_g_at    | EC          | Caspase 9                                           | proteolysis and peptidolysis                                  | 0.89                                 | 1.02    | 1.14    | 180.07                                           | 16.39   | 157.80 | 11.22   | 160.35 | 6.93    |        |
| AF022990 | Cor5, CCR5     | 102718_at      | M           | chemokine receptor-5 (CCR5)                         | signal transduction                                           | 0.99                                 | 1.11    | 1.12    | 21.10                                            | 1.10    | 18.81  | 1.20    | 20.80  | 1.26    |        |
|          | U34881         | Cd8a           | 102975_at   | M                                                   | CD8 antigen, alpha chain                                      | 0.95                                 | 1.04    | 1.09    | 26.40                                            | 1.20    | 24.23  | 1.53    | 25.15  | 0.60    |        |
|          | M17640         | Chrna1         | 100021_at   | M                                                   | cholinergic receptor, nicotinic, alpha polypeptide 1          | 0.95                                 | 1.04    | 1.10    | 31.37                                            | 0.97    | 28.50  | 1.76    | 29.77  | 0.85    |        |
| AV339532 | Kcb            | 162257_i_at    | IC          | creatine kinase, brain                              | energy homeostasis                                            | 0.90                                 | 1.06    | 1.18    | 25.11                                            | 2.13    | 21.36  | 0.90    | 22.59  | 2.20    |        |
| AF012822 | Cpsf2          | 160542_at      | N           | cleavage and polyadenylation specific factor 2      | transcript processing                                         | 0.95                                 | 1.04    | 1.09    | 506.90                                           | 19.83   | 464.75 | 27.27   | 481.11 | 21.67   |        |
| AF010338 | Cubn           | 95000_g_at     | M           | cubilin (intrinsic factor-cobalamin receptor)       | endocytic receptors                                           | 1.13                                 | 0.73    | 0.65    | 77.28                                            | 5.94    | 119.49 | 31.34   | 87.06  | 14.83   |        |
|          | M20625         | Cyct           | 92929_at    | mit                                                 | cytochrome c, testis                                          | 0.96                                 | 1.05    | 1.10    | 97.36                                            | 6.13    | 88.84  | 3.15    | 93.29  | 3.82    |        |
|          | U75530         | Eif4ebp2       | 94353_at    | IC                                                  | eukaryotic translation initiation factor 4E binding protein 2 | 0.98                                 | 1.07    | 1.09    | 275.71                                           | 13.94   | 252.47 | 11.68   | 270.14 | 13.34   |        |
|          | L12703         | En1            | 96523_at    | N                                                   | engrailed 1                                                   | 0.75                                 | 1.11    | 1.48    | 197.67                                           | 54.42   | 133.34 | 16.78   | 147.98 | 11.97   |        |
|          | AF030001       | Fkbp1          | 102206_at   | G                                                   | FK506 binding protein like                                    | 0.97                                 | 1.04    | 1.07    | 110.90                                           | 5.14    | 103.34 | 4.08    | 107.45 | 3.90    |        |
| AV309794 | Gkap42-pending | 161833_r_at    | M           | cGMP-dependent protein kinase anchoring protein     | signal transduction                                           | 0.98                                 | 1.13    | 1.16    | 41.88                                            | 2.93    | 36.26  | 2.52    | 40.98  | 4.11    |        |
|          | M96688         | Kcna6          | 94719_at    | G                                                   | voltage-gated K channel, shaker-related, subfamily, member 6  | 0.94                                 | 1.06    | 1.12    | 29.65                                            | 1.56    | 26.50  | 0.80    | 27.99  | 0.87    |        |
| AB028071 | Keg1           | 96938_at       | mit         | kidney expressed gene 1                             | unknown                                                       | 0.93                                 | 1.05    | 1.14    | 29.89                                            | 2.40    | 26.32  | 1.51    | 27.72  | 1.45    |        |
| AV330502 | Kpnb1          | 161936_at      | IC, N       | karyopherin (importin) beta 1                       | nuclear transport                                             | 0.95                                 | 1.07    | 1.12    | 51.96                                            | 3.43    | 46.38  | 2.88    | 49.43  | 2.20    |        |
|          | X03491         | Krt2-4         | 100421_at   | CySk                                                | keratin complex 2, basic, gene 4                              | 0.89                                 | 1.01    | 1.13    | 420.59                                           | 35.98   | 373.56 | 23.64   | 375.73 | 21.54   |        |
| AV295936 | L1             | 162111_r_at    |             | lurcher transcript 1                                |                                                               | 0.90                                 | 1.08    | 1.19    | 17.92                                            | 1.71    | 15.01  | 1.02    | 16.16  | 1.12    |        |
|          | L1a; LT; Llx   | M17015         | 100327_at   | EC                                                  | lymphotoxin                                                   | 0.95                                 | 1.09    | 1.15    | 315.84                                           | 24.11   | 274.97 | 21.51   | 298.66 | 20.43   |        |
|          | U19033         | Mageb3; Smage3 | 95783_g_at  | mit                                                 | melanoma antigen, family B, 3                                 | 0.92                                 | 1.03    | 1.13    | 67.28                                            | 5.15    | 59.50  | 3.46    | 61.60  | 4.53    |        |
| AV339603 | Mrs318a        | 161767_r_at    | mit         | mitochondrial ribosomal protein S18A                | mitochondrial protein translation                             | 0.89                                 | 1.03    | 1.15    | 1023.33                                          | 73.16   | 887.99 | 74.27   | 911.93 | 62.65   |        |
| AW125634 | Mrs34-pending  | 104560_at      | mit         | putative mitochondrial solute carrier               | mitochondrial transport                                       | 1.06                                 | 0.90    | 0.85    | 241.12                                           | 11.99   | 284.44 | 34.72   | 256.09 | 21.37   |        |
|          | U31566         | Nkx2-2         | 92747_at    | N                                                   | NK2 transcription factor related, locus 2 (Drosophila)        | 1.22                                 | 0.91    | 0.75    | 70.70                                            | 7.12    | 94.88  | 10.08   | 86.54  | 19.07   |        |
| AV320040 | Nmyc1          | 161417_r_at    | N           | neuroblastoma myc-related oncogene 1                | transcription factor                                          | 0.97                                 | 1.05    | 1.09    | 9.80                                             | 0.30    | 8.99   | 0.38    | 9.47   | 0.32    |        |
|          | U12961         | Nqo1           | 94351_r_at  | IC                                                  | NAD(P)H dehydrogenase, quinone 1                              | 0.99                                 | 1.07    | 1.08    | 40.63                                            | 1.74    | 37.47  | 1.60    | 40.12  | 1.64    |        |
| AV320880 | Nr5a1          | 161418_r_at    | N           | nuclear receptor subfamily 5, group A, member 1     | transcription regulation                                      | 0.88                                 | 1.06    | 1.21    | 40.69                                            | 2.10    | 33.67  | 3.01    | 35.78  | 4.09    |        |
|          | X53257         | Ntf3; NTF3     | 92420_at    | EC                                                  | neurotrophin-3 peptide                                        | 1.06                                 | 0.90    | 0.85    | 38.51                                            | 3.09    | 45.08  | 3.44    | 40.75  | 2.26    |        |
|          | U51908         | Ntr2           | 93137_at    | M                                                   | neurotensin receptor 2                                        | signal transduction, neuromodulation | 1.17    | 0.99    | 0.85                                             | 893.37  | 66.75  | 1046.40 | 93.86  | 1041.15 | 107.83 |
|          | Y16386         | Orc4           | 104096_at   | N                                                   | origin recognition complex, subunit 4-like (S. cerevisiae)    | 0.80                                 | 1.09    | 1.37    | 470.82                                           | 50.09   | 344.70 | 85.57   | 374.67 | 22.61   |        |
|          | X06064         | Pde6a          | 106096_at   | IC                                                  | phosphodiesterase 6A, cGMP-specific, rod, alpha               | 0.91                                 | 1.05    | 1.16    | 123.31                                           | 8.70    | 106.73 | 5.29    | 112.56 | 10.46   |        |
|          | U70209         | Pkd1           | 97375_at    | M                                                   | polycystic kidney disease 1 homolog                           | 1.05                                 | 0.96    | 0.91    | 215.00                                           | 9.42    | 235.29 | 15.61   | 226.72 | 4.26    |        |
| AJ250489 | Ramp1          | 104680_at      | M           | receptor (calcitonin) activity modifying protein 1  | receptor transport and activity                               | 1.03                                 | 0.83    | 0.80    | 436.50                                           | 36.06   | 543.29 | 50.16   | 448.28 | 73.30   |        |
| AV076835 | Rgs11          | 161309_r_at    |             | regulator of G protein                              | signal transduction                                           | 0.91                                 | 1.07    | 1.17    | 17.75                                            | 0.83    | 15.14  | 1.15    | 16.20  | 0.97    |        |
| AV148041 | Rpo1-1         | 161347_r_at    | N           | RNA polymerase 1-1                                  | rRNA transcription                                            | 0.91                                 | 1.08    | 1.18    | 466.26                                           | 35.87   | 394.14 | 25.20   | 426.15 | 47.34   |        |
| AV293936 | S100a14        | 162428_i_at    |             | S100 calcium binding protein A14                    |                                                               | 0.88                                 | 1.01    | 1.15    | 1057.33                                          | 100.03  | 916.15 | 80.72   | 927.98 | 46.28   |        |
| AA189555 | Sfxn2          | 160967_at      | mit         | sideroflexin 2                                      | cation transport                                              | 0.93                                 | 1.02    | 1.10    | 77.73                                            | 5.95    | 70.73  | 1.77    | 72.47  | 3.88    |        |
|          | U40576         | Sim2           | 92896_s_at  | N                                                   | single-minded 2                                               | transcription factor                 | 0.96    | 1.08    | 1.12                                             | 23.83   | 1.84   | 21.25   | 1.35   | 22.86   | 0.77   |
|          | U95132         | Slc10a1        | 100341_g_at | M                                                   | solute carrier family 10, member 1                            | sodium/bile acid cotransporter       | 0.93    | 1.06    | 1.14                                             | 19.18   | 1.22   | 16.84   | 1.41   | 17.90   | 0.92   |
|          | D49473         | Sox17          | 92996_at    | N                                                   | SRY-box containing gene 17                                    | transcription factor                 | 1.00    | 0.87    | 0.87                                             | 127.39  | 11.84  | 146.65  | 12.10  | 127.49  | 9.50   |
| AF096285 | Strap          | 94292_at       |             | serine/threonine kinase receptor associated protein | signal transduction                                           | 0.74                                 | 1.06    | 1.43    | 386.86                                           | 76.83   | 269.90 | 73.44   | 284.77 | 30.50   |        |
| AV102624 | Upp            | 161325_at      |             | uridine phosphorylase                               | nucleoside metabolism                                         | 0.90                                 | 1.04    | 1.16    | 503.35                                           | 44.47   | 435.69 | 34.02   | 452.60 | 21.40   |        |
| AF011412 | V2r2           | 101630_f_at    | M           | vomer nasal 2, receptor, 2                          | putative pheromone receptor                                   | 0.95                                 | 1.07    | 1.13    | 113.83                                           | 6.51    | 100.88 | 5.19    | 108.03 | 4.08    |        |
| AV245272 | Vim            | 162379_r_at    | CySk        | vimentin                                            | intermediate filament of the cytoskeleton                     | 0.94                                 | 1.08    | 1.15    | 252.09                                           | 15.26   | 219.41 | 20.21   | 236.29 | 15.61   |        |
| AL078630 |                | 98779_at       |             | CT7-BM573K1 on chromosome 17                        |                                                               | 0.98                                 | 1.08    | 1.10    | 147.14                                           | 9.59    | 133.24 | 3.24    | 143.61 | 10.34   |        |
|          |                |                |             | ESTs                                                |                                                               | 0.95                                 | 1.02    | 1.08    | 26.81                                            | 0.53    | 24.87  | 0.68    | 25.35  | 1.40    |        |
| AA516942 |                | 94684_at       |             | ESTs                                                |                                                               | 0.92                                 | 1.06    | 1.15    | 42.06                                            | 3.51    | 36.72  | 2.34    | 38.76  | 1.36    |        |
| AA536953 | vj86c09.r      | 101125_at      |             | IMAGE:943984                                        |                                                               | 0.95                                 | 1.05    | 1.11    | 26.51                                            | 1.26    | 23.86  | 1.00    | 25.09  | 1.50    |        |
| AI854813 |                | 160993_at      |             | clone UI-M-BH0-aka-h-03-0-UI                        |                                                               | 0.95                                 | 1.06    | 1.12    | 23.66                                            | 1.60    | 21.21  | 1.14    | 22.44  | 0.59    |        |
| AW229141 | 2310006I24Rik  | 95075_at       |             | RIKEN cDNA 2310006I24 gene                          |                                                               | 0.84                                 | 1.04    | 1.24    | 68.75                                            | 5.82    | 55.58  | 6.70    | 57.63  | 7.07    |        |
| AI846338 | 2400006G15Rik  | 95517_i_at     |             | RIKEN cDNA 2400006G15 gene                          |                                                               | 1.21                                 | 0.98    | 0.80    | 638.95                                           | 87.35   | 794.68 | 97.63   | 775.01 | 94.37   |        |
| AV115721 | 2410017E24Rik  | 161334_r_at    |             | RIKEN cDNA 2410017E24 gene                          |                                                               | 0.95                                 | 1.09    | 1.15    | 116.88                                           | 11.42   | 101.40 | 2.48    | 110.99 | 9.30    |        |
| AA795841 | 2410080P20Rik  | 100917_at      |             | RIKEN cDNA 2410080P20 gene                          |                                                               | 1.05                                 | 0.93    | 0.89    | 146.56                                           | 6.98    | 165.17 | 10.17   | 153.38 | 12.18   |        |
| AV379830 | 5033402L14Rik  | 162135_r_at    |             | RIKEN cDNA 5033402L14 gene                          |                                                               | 1.12                                 | 1.00    | 0.89    | 8.39                                             | 0.20    | 9.40   | 0.44    | 9.37   | 0.94    |        |
| AI843141 | AA437972       | 97281_at       |             | EST AA437972                                        |                                                               | 0.88                                 | 1.02    | 1.16    | 117.08                                           | 12.97   | 101.02 | 8.04    | 103.32 | 5.66    |        |
| AW120832 | B230313        |                |             |                                                     |                                                               |                                      |         |         |                                                  |         |        |         |        |         |        |

## **Supplemental Table 2**

Mean Expression Profiles for developmentally important transcription factors in three MN cell types. The members of several classes of developmentally relevant transcription factors that are included on the microarray are listed. Their average normalized signal intensities in each cell type are shown (5 animals per cell type, ten chips per cell type). Note that some genes are represented by multiple probe sets. Genes showing significantly different expression values across the three cell types are red. The last column indicates the class of each significantly different gene, as designated in Supplemental Table S1 and Figure 5.



affy ID      Name      Ave IML   Ave LMN   Ave MMN   Class (in Suppl. 1)

**HomeoDomain (HD) containing proteins**

**a. Iroquois related**

99034\_at    **Irx3**                    **79.01**    **170.47**    **155.92**   **II**

**b. Engrailed**

96523\_at    **En1**                    **147.98**    **197.67**    **133.34**   **VII**

98338\_at    **En2**                    121.32    117.17    121.14

**c. Hox**

95297\_at    Hoxa1                    56.2      59.4      57.7

92970\_at    Hoxa10                   36.2      47.3      47.9

104021\_at   Hoxa11                   44.8      47.6      50.5

93873\_s\_at   Hoxa11s                  54.9      58.8      61.1

161670\_f\_at   Hoxa11s                  170.7     190.1     179.2

94636\_at    Hoxa13                    86.5      84.1      84.1

102643\_at    Hoxa2                    111.6     116.0     111.8

102087\_at    Hoxa3                    62.6      68.0      64.3

97747\_r\_at    Hoxa4                    682.0     677.6     691.4

97746\_f\_at    Hoxa4                    11.8      11.0      11.4

97745\_at    Hoxa4                    144.5     144.9     136.9

162402\_r\_at   **Hoxa4**                    **14.3**      **16.8**      **14.8**    **V**

103086\_at    Hoxa5                    419.6     388.8     450.3

102580\_r\_at   Hoxa6                    132.9     130.6     133.5

102864\_at    Hoxa7                    360.2     469.2     429.0

102579\_f\_at   Hoxa7                    65.4      76.9      74.7

92745\_at    Hoxa9                    243.6     297.1     277.6

93888\_at    Hoxb1                    52.6      50.6      52.0

99808\_at    Hoxb13                    98.7      96.4      98.9

98780\_at    Hoxb3                    80.0      82.1      79.8

92255\_at    Hoxb4                    60.2      63.7      61.6

103666\_at    Hoxb5                    413.7     391.8     429.3

103445\_at    Hoxb6                    347.2     333.3     324.7

92915\_s\_at   Hoxb7                    288.5     295.6     286.1

92914\_at    Hoxb7                    267.7     261.6     257.1

96418\_r\_at   Hoxb8                    379.5     420.4     387.7

96417\_s\_at   Hoxb8                    46.1      49.1      45.9

103952\_at    Hoxb9                    54.6      49.8      52.7

102660\_at    Hoxc4                    84.5      87.3      84.1

95312\_at    Hoxc5                    145.1     155.1     157.9

99980\_at    Hoxc6                    136.1     134.4     122.1

93378\_at    Hoxc8                    123.0     146.4     118.0

92891\_f\_at   Hoxc9                    159.7     164.6     159.6

98820\_g\_at   Hoxd1                    66.8      12.9      14.3

98819\_at    Hoxd1                    127.0     87.9      81.4

103741\_at    Hoxd10                   113.1     125.6     132.3

92951\_at    Hoxd11                   104.8     119.4     121.9

99427\_at    Hoxd12                    30.4      32.0      29.0

102567\_at    Hoxd13                    93.9      92.3      95.1

98367\_at    Hoxd3                    26.9      27.8      26.2

102380\_s\_at   Hoxd4                    103.8     111.9     104.4

|           |       |       |       |       |
|-----------|-------|-------|-------|-------|
| 93221_at  | Hoxd8 | 137.3 | 144.2 | 153.4 |
| 160460_at | Hoxd8 | 828.8 | 802.7 | 939.7 |
| 99426_at  | Hoxd9 | 121.4 | 128.4 | 127.8 |

**d. Paired box Proteins**

|           |      |        |        |        |
|-----------|------|--------|--------|--------|
| 100697_at | Pax3 | 66.28  | 66.83  | 64.92  |
| 99908_at  | Pax4 | 264.98 | 287.89 | 278.95 |
| 92271_at  | Pax6 | 92.89  | 95.58  | 90.27  |

**e. NKx Proteins**

|           |        |        |        |           |
|-----------|--------|--------|--------|-----------|
| 98337_at  | Nkx1-2 | 170.94 | 164.87 | 161.58    |
| 92747_at  | Nkx2-2 | 86.54  | 70.70  | 94.88 VII |
| 101334_at | Nkx2-3 | 72.53  | 71.07  | 74.73     |
| 97777_at  | Nkx2-5 | 94.74  | 98.44  | 95.36     |
| 99873_at  | Nkx2-6 | 70.12  | 72.60  | 68.62     |
| 96422_at  | Nkx2-9 | 200.96 | 195.52 | 199.99    |
| 97157_at  | Nkx3-1 | 28.83  | 30.28  | 31.27     |
| 93182_at  | Nkx6-2 | 291.31 | 243.77 | 275.16    |

**f. Paired-like Homeobox Proteins**

|          |        |       |       |       |
|----------|--------|-------|-------|-------|
| 92980_at | Phox2a | 91.38 | 91.22 | 93.47 |
|----------|--------|-------|-------|-------|

**g. Lim-HD Proteins**

|           |       |       |       |       |
|-----------|-------|-------|-------|-------|
| 93644_at  | Lhx9  | 30.0  | 30.4  | 30.2  |
| 93643_at  | Lhx9  | 23.3  | 22.3  | 22.8  |
| 94176_at  | Lhx6  | 68.0  | 69.1  | 68.6  |
| 94754_at  | Lhx8  | 27.7  | 28.6  | 28.1  |
| 92515_at  | Isl1  | 54.4  | 49.2  | 51.8  |
| 101775_at | Lmx1b | 155.9 | 171.3 | 163.6 |
| 102902_at | Lhx3  | 112.1 | 127.5 | 119.8 |
| 101192_at | Lhx5  | 65.5  | 64.4  | 65.0  |
| 92961_at  | Lhx1  | 162.3 | 170.2 | 166.2 |

**Lim domain proteins**

**a. Lim domain only proteins**

|            |      |        |        |        |
|------------|------|--------|--------|--------|
| 102413_at  | Lmo1 | 349.3  | 399.5  | 374.4  |
| 96810_at   | Lmo2 | 312.0  | 230.1  | 271.0  |
| 93666_at   | Lmo2 | 135.9  | 122.3  | 129.1  |
| 98122_at   | Lmo4 | 957.9  | 1129.3 | 1043.6 |
| 93451_at   | Lmo7 | 378.7  | 217.4  | 298.1  |
| 97500_g_at | Fhl1 | 281.4  | 315.7  | 298.5  |
| 97499_at   | Fhl1 | 13.8   | 13.8   | 13.8   |
| 97498_at   | Fhl1 | 1061.1 | 1017.0 | 1039.1 |
| 100986_at  | Fhl2 | 153.8  | 145.1  | 149.5  |

**b. Lim and SH3 domain proteins**

|          |       |       |       |         |
|----------|-------|-------|-------|---------|
| 93930_at | Lasp1 | 135.5 | 145.0 | 140.2   |
| 93793_at | Lasp1 | 286.9 | 208.0 | 247.5 V |

**c. Lim kinase protein**

|             |       |        |        |          |
|-------------|-------|--------|--------|----------|
| 102889_r_at | Limk1 | 1493.3 | 1631.6 | 1562.4 V |
| 102888_s_at | Limk1 | 426.9  | 443.0  | 435.0    |
| 99606_at    | Limk2 | 480.5  | 504.8  | 492.7    |

**d. PDZ and Lim domain**

|             |        |       |       |           |
|-------------|--------|-------|-------|-----------|
| 161348_r_at | Pdlim1 | 384.9 | 454.5 | 419.7 III |
|-------------|--------|-------|-------|-----------|

|           |        |       |       |       |
|-----------|--------|-------|-------|-------|
| 100554_at | Pdlim1 | 145.5 | 125.8 | 135.6 |
| 101089_at | Pdlim3 | 23.1  | 24.1  | 23.6  |
| 162494_at | Pdlim4 | 20.9  | 21.4  | 21.2  |
| 104094_at | Pdlim4 | 93.8  | 91.7  | 92.8  |
| 98413_at  | Pdlim7 | 14.3  | 15.1  | 14.7  |
| 160837_at | Pdlim7 | 465.6 | 488.7 | 477.2 |
| 160367_at | Pdlim7 | 29.8  | 28.1  | 28.9  |
| 102845_at | Pdlim7 | 198.4 | 203.3 | 200.8 |

### Forkhead Domain Proteins

|             |        |        |        |            |
|-------------|--------|--------|--------|------------|
| 92697_at    | Foxa1  | 21.73  | 21.40  | 22.41      |
| 93950_at    | Foxa2  | 128.18 | 132.39 | 131.80     |
| 98324_at    | Foxa3  | 41.40  | 44.33  | 39.91      |
| 94687_at    | Foxb1  | 16.15  | 14.44  | 15.12      |
| 94618_at    | Foxb2  | 188.75 | 192.80 | 190.06     |
| 160604_at   | Foxc1  | 11.21  | 9.90   | 10.95 V    |
| 102800_at   | Foxc2  | 174.47 | 130.32 | 172.62     |
| 162016_f_at | Foxc2  | 129.28 | 82.74  | 126.63 III |
| 160996_at   | Foxd1  | 88.92  | 66.34  | 83.15 V    |
| 94621_at    | Foxd2  | 297.53 | 297.24 | 295.47     |
| 92889_r_at  | Foxd3  | 19.15  | 19.67  | 18.25      |
| 101648_at   | Foxd4  | 32.67  | 32.37  | 31.22      |
| 93704_at    | Foxf1a | 42.59  | 48.78  | 44.37      |
| 99846_at    | Foxf2  | 24.67  | 22.91  | 26.88      |
| 161049_at   | Foxg1  | 12.95  | 12.90  | 13.14      |
| 97789_at    | Foxh1  | 354.98 | 346.55 | 341.72     |
| 98831_at    | Foxj1  | 357.49 | 421.04 | 440.07 II  |
| 160969_at   | Foxk1  | 166.16 | 169.62 | 166.28     |
| 101185_at   | Foxl1  | 200.21 | 215.03 | 202.77     |
| 98305_at    | Foxm1  | 219.82 | 228.30 | 219.14     |
| 98306_g_at  | Foxm1  | 576.53 | 576.46 | 551.50     |
| 92674_at    | Foxn1  | 109.87 | 114.81 | 108.77     |
| 92958_at    | Foxo3  | 579.71 | 453.55 | 512.21     |
| 96183_at    | Foxp1  | 72.39  | 72.47  | 72.72      |
| 104415_at   | Foxp1  | 127.92 | 108.01 | 123.74 V   |
| 92658_at    | Foxq1  | 82.49  | 78.72  | 83.59      |

### ETS Proteins

|             |           |        |        |         |
|-------------|-----------|--------|--------|---------|
| 92927_at    | ER81/Etv1 | 251.37 | 201.19 | 183.09  |
| 161842_r_at | Pea3/Etv4 | 492.63 | 515.28 | 490.83  |
| 92979_at    | Pea3/Etv4 | 129.01 | 135.17 | 140.56  |
| 94332_at    | Ets1      | 29.52  | 27.09  | 27.55   |
| 94720_at    | Ets1      | 104.45 | 104.38 | 103.73  |
| 94246_at    | Ets2      | 193.04 | 161.31 | 180.71  |
| 160721_at   | Elf1      | 21.08  | 17.40  | 19.29 V |
| 161584_r_at | Elf1      | 8.85   | 8.34   | 8.78    |

### basic Helix-loop-Helix Proteins

|           |             |         |        |          |
|-----------|-------------|---------|--------|----------|
| 102238_at | Mash1/Ascl1 | 53.8654 | 56.325 | 49.72938 |
|-----------|-------------|---------|--------|----------|

|           |            |         |         |          |
|-----------|------------|---------|---------|----------|
| 161069_at | Neurog1    | 13.472  | 13.3833 | 14.08956 |
| 93230_at  | Neurog1    | 104.918 | 100.713 | 105.5938 |
| 97792_at  | Neurog2    | 44.0113 | 45.2759 | 45.74502 |
| 99814_at  | Neurog3    | 93.523  | 97.1659 | 93.63582 |
| 102569_at | Math1/Atoh | 109.594 | 115.259 | 113.4677 |



| Genbank  | Common           | Location  | Description                                       | Function                                               | Fold changes* |         | Average Signal Intensities & Standard Deviations |         |         |         |         |         |         |
|----------|------------------|-----------|---------------------------------------------------|--------------------------------------------------------|---------------|---------|--------------------------------------------------|---------|---------|---------|---------|---------|---------|
|          |                  |           |                                                   |                                                        | IML/LMN       | MLN/MMN | LMN                                              | SD      | MMN     | SD      | IML     | SD      |         |
| A1852470 | Nme3             | EC        | nucleoside diphosphate kinase DR-nm23             | nucleotide biosynthesis                                | 1.60          | 1.23    | 0.77                                             | 603.27  | 39.26   | 785.07  | 75.76   | 963.32  | 140.90  |
| X13986   | Spp1             | EC        | secreted phosphoprotein 1                         | cell adhesion, cytokine activity                       | 0.51          | 0.69    | 1.36                                             | 3754.97 | 328.59  | 2758.02 | 340.15  | 1902.64 | 425.02  |
| AA690434 | Ace2             | M, EC     | angiotensin I converting enzyme                   | proteolysis and peptidolysis                           | 1.15          | 1.18    | 1.02                                             | 13.34   | 1.10    | 13.08   | 0.40    | 15.40   | 1.26    |
| AF004326 | Agpt2            | EC        | angiopoietin 2                                    | promotes angiogenesis                                  | 1.54          | 1.41    | 0.92                                             | 42.12   | 9.12    | 45.87   | 9.63    | 64.72   | 13.39   |
| M22531   | C1qb             | EC        | complement component 1q beta polypeptide          | complement activity                                    | 1.46          | 1.33    | 0.91                                             | 58.84   | 6.66    | 64.50   | 14.16   | 85.78   | 10.18   |
| K02782   | C3               | EC        | complement component 3                            | complement activity                                    | 2.61          | 1.81    | 0.70                                             | 97.18   | 18.14   | 139.77  | 47.79   | 253.45  | 69.08   |
| U49513   | Ccl9             | EC        | chemokine (C-C motif) ligand 9                    | signal transduction                                    | 1.39          | 1.28    | 0.92                                             | 57.47   | 3.38    | 62.55   | 6.38    | 79.82   | 7.79    |
| U60473   | Cd59a            | M, EC     | CD59a antigen                                     | complement activity                                    | 0.78          | 0.80    | 1.03                                             | 2333.06 | 192.37  | 2257.15 | 205.82  | 1810.77 | 161.36  |
| AF011450 | Col15a1          | EC        | procollagen, type XV                              | ECM structural constituent                             | 1.46          | 1.28    | 0.88                                             | 95.13   | 9.71    | 108.00  | 21.04   | 138.69  | 12.32   |
| U74683   | Ctsc             | lys, EC   | cathepsin C                                       | proteolysis and peptidolysis                           | 2.06          | 1.66    | 0.81                                             | 46.57   | 19.13   | 57.78   | 28.55   | 96.08   | 17.39   |
| AJ223208 | Ctss             | lys, EC   | cathepsin S preprotein                            | proteolysis and peptidolysis                           | 1.92          | 1.69    | 0.88                                             | 624.07  | 123.03  | 710.46  | 236.09  | 1201.30 | 355.01  |
| X83577   | Gpc4             | M, EC     | glypican 4                                        | signal transduction, ECM interactions                  | 1.42          | 1.26    | 0.89                                             | 80.82   | 8.85    | 90.78   | 12.18   | 114.65  | 11.73   |
| U13705   | Gpx3             | EC        | glutathione peroxidase 3                          | response to oxidative stress                           | 1.50          | 1.43    | 0.96                                             | 239.10  | 53.58   | 250.15  | 83.75   | 357.50  | 40.44   |
| AI574278 | Ide              | EC        | insulin degrading enzyme                          | proteolysis and peptidolysis                           | 0.74          | 0.78    | 1.05                                             | 86.68   | 7.83    | 82.79   | 12.92   | 64.28   | 7.43    |
| AA726364 | lpl              | EC        | lipoprotein lipase                                | lipid metabolism                                       | 2.75          | 2.18    | 0.79                                             | 59.35   | 7.37    | 74.69   | 31.28   | 162.93  | 109.02  |
| M21050   | lys              | EC, mit   | lysozyme                                          | carbohydrate metabolism                                | 4.49          | 2.82    | 0.63                                             | 44.54   | 16.27   | 71.04   | 37.29   | 200.10  | 188.88  |
| X72795   | Mmp9             | EC        | matrix metalloproteinase 9                        | proteolysis and peptidolysis                           | 0.51          | 0.68    | 1.35                                             | 393.23  | 104.18  | 291.36  | 26.91   | 198.85  | 44.93   |
| M17298   | Ngbf             | EC        | nerve growth factor, beta                         | growth & maintenance, signal transduction              | 0.87          | 0.89    | 1.01                                             | 32.01   | 2.59    | 31.56   | 2.19    | 27.93   | 1.44    |
| D13664   | Osf2-pending     | EC        | periostin                                         | cell adhesion, transcription factor                    | 3.07          | 2.67    | 0.87                                             | 36.42   | 12.52   | 41.88   | 19.12   | 111.72  | 78.27   |
| M55181   | Penk1            | EC        | preproenkephalin 1                                | neuropeptide signal transduction                       | 3.15          | 2.43    | 0.77                                             | 1506.34 | 665.99  | 1950.34 | 586.98  | 4748.73 | 1129.00 |
| X68837   | Scg2; Chgc; Sgll | EC        | secretogranin II                                  | calcium binding                                        | 1.43          | 1.44    | 1.01                                             | 598.54  | 128.03  | 592.51  | 76.28   | 855.68  | 90.06   |
| D17584   | Tac1             | EC        | tachykinin 1                                      | neuropeptide signal transduction                       | 6.31          | 5.41    | 0.86                                             | 67.04   | 29.24   | 78.17   | 72.89   | 422.82  | 503.80  |
| AV218205 | Cst3             | EC        | cystatin C                                        | cysteine protease inhibitor activity                   | 1.59          | 1.18    | 0.74                                             | 327.66  | 33.81   | 440.51  | 20.46   | 520.65  | 149.06  |
| L11333   | Es31             | ER, EC    | esterase 31                                       | carboxylesterase activity                              | 0.89          | 1.01    | 1.14                                             | 65.86   | 2.86    | 58.02   | 4.23    | 58.42   | 3.10    |
| AV062425 | Gast             | EC        | gastrin                                           | peptide hormone                                        | 0.78          | 1.03    | 1.32                                             | 44.90   | 3.67    | 34.05   | 3.55    | 35.08   | 3.28    |
| AB012886 | Igfbp7           | EC        | insulin-like growth factor binding protein 7      | regulation of growth & metabolism                      | 1.15          | 0.99    | 0.86                                             | 119.44  | 8.53    | 138.68  | 13.30   | 137.00  | 5.50    |
| AV345275 | Matn2            | EC        | matrilin 2                                        | non-collagenous extracellular matrix protein           | 0.90          | 1.02    | 1.13                                             | 95.50   | 5.40    | 84.21   | 5.47    | 86.09   | 4.85    |
| L34169   | Thpo             | EC        | thrombopoietin                                    | hormone/cytokine, cell growth & maintenance            | 0.92          | 0.99    | 1.08                                             | 97.41   | 5.75    | 90.56   | 2.84    | 89.24   | 1.61    |
| D38410   | Tff3             | EC        | trefoil factor 3, intestinal                      | peptide signal transduction                            | 0.91          | 1.00    | 1.09                                             | 295.52  | 15.01   | 270.28  | 11.28   | 269.31  | 7.76    |
| X61448   | Cbln1            | EC        | cerebellin 1 precursor protein                    | neuropeptide, unknown function                         | 0.85          | 0.44    | 0.52                                             | 464.56  | 76.34   | 895.38  | 258.83  | 395.70  | 37.93   |
| AB016592 | Agr2             | EC        | anterior gradient 2 (Xenopus laevis)              | survival factor                                        | 0.84          | 0.97    | 1.15                                             | 56.02   | 6.39    | 48.69   | 3.52    | 47.26   | 3.92    |
| AF006196 | Adam15           | M, EC     | a disintegrin and metalloproteinase domain 15     | membrane surface & ECM proteolysis, cell adhesion      | 0.83          | 0.92    | 1.10                                             | 179.21  | 20.29   | 162.53  | 9.92    | 149.58  | 12.35   |
| AF045887 | Agt; Aogen       | EC        | angiotensinogen                                   | local & circulating hormone                            | 1.65          | 1.16    | 0.70                                             | 346.27  | 56.61   | 495.47  | 100.82  | 572.68  | 210.40  |
| M29008   | Cfh1             | EC        | complement component factor h-like 1              | complement activity                                    | 1.71          | 1.28    | 0.75                                             | 92.37   | 25.95   | 123.78  | 46.98   | 158.01  | 34.68   |
| M29009   | Cfh              | EC        | complement component factor h                     | complement activity                                    | 2.18          | 1.25    | 0.57                                             | 61.16   | 23.73   | 106.38  | 67.00   | 133.15  | 46.79   |
| AV003419 | Anxa1; lpc1      | EC, M, IC | annexin A 1, lipocortin 1                         | Ca- & phospholipid-binding protein, multiple functions | 5.95          | 2.37    | 0.40                                             | 90.78   | 49.43   | 227.72  | 137.75  | 540.17  | 661.66  |
| X13460   | Anxa6            | EC, M, IC | annexin A6                                        | Ca- & phospholipid-binding protein, multiple functions | 0.60          | 0.67    | 1.10                                             | 1393.51 | 314.44  | 1261.77 | 462.23  | 839.86  | 233.55  |
| D00466   | ApoE             | EC        | apolipoprotein, E                                 | lipid transport, lipoprotein metabolism                | 2.13          | 1.35    | 0.63                                             | 2898.04 | 825.71  | 4594.10 | 1631.17 | 6182.09 | 1664.78 |
| X53928   | Bgn              | EC        | biglycan                                          | glycoprotein, binds collagen                           | 2.82          | 1.60    | 0.57                                             | 403.42  | 157.52  | 711.40  | 431.96  | 1136.95 | 646.38  |
| X66295   | C1qg             | EC        | complement component 1q gamma                     | complement activity                                    | 1.28          | 1.23    | 0.96                                             | 200.32  | 26.15   | 208.95  | 33.14   | 257.01  | 28.74   |
| AI132585 | C1r              | EC        | complement component 1, r subcomponent            | complement activity                                    | 1.43          | 1.23    | 0.86                                             | 107.38  | 10.42   | 125.36  | 30.94   | 153.62  | 26.18   |
| X06454   | C4               | EC        | complement component 4 (within H-2S)              | complement activity                                    | 1.89          | 1.47    | 0.78                                             | 120.05  | 32.18   | 153.87  | 57.37   | 226.44  | 55.29   |
| M29009   | Cfh              | EC        | complement component factor h                     | complement activity                                    | 2.18          | 1.25    | 0.57                                             | 61.16   | 23.73   | 106.38  | 67.00   | 133.15  | 46.79   |
| M29008   | Cfh1             | EC        | complement component factor h-like 1              | complement activity                                    | 1.71          | 1.28    | 0.75                                             | 92.37   | 25.95   | 123.78  | 46.98   | 158.01  | 34.68   |
| U30292   | Col13a1          | EC        | procollagen, type XIII, alpha 1                   | structural constituent of ECM                          | 1.11          | 1.04    | 0.93                                             | 29.48   | 1.61    | 31.55   | 2.26    | 32.86   | 1.61    |
| D17546   | Col18a1          | EC        | procollagen, type XVIII, alpha 1                  | structural constituent of ECM                          | 1.30          | 1.09    | 0.84                                             | 309.16  | 33.95   | 369.33  | 56.76   | 402.43  | 44.33   |
| AB000636 | Col19a1          | EC        | procollagen, type XIX, alpha 1                    | structural constituent of ECM                          | 0.71          | 0.80    | 1.13                                             | 80.36   | 10.98   | 70.94   | 12.29   | 56.87   | 3.56    |
| U03419   | Col1a1           | EC        | procollagen, type I, alpha 1                      | structural constituent of ECM                          | 1.77          | 1.65    | 0.93                                             | 94.29   | 36.22   | 100.92  | 29.89   | 166.89  | 65.57   |
| AV234303 | Col3a1           | EC        | procollagen, type III, alpha 1                    | structural constituent of ECM                          | 3.96          | 1.99    | 0.50                                             | 34.39   | 18.35   | 68.49   | 39.97   | 136.16  | 88.17   |
| X66405   | Col6a1           | EC        | procollagen, type VI, alpha 1                     | structural constituent of ECM                          | 1.59          | 1.31    | 0.83                                             | 330.96  | 42.84   | 400.37  | 127.69  | 526.04  | 162.82  |
| AV010209 | Col6a1           | EC        | procollagen, type VI, alpha 1                     | structural constituent of ECM                          | 2.24          | 1.54    | 0.69                                             | 48.95   | 12.18   | 71.29   | 30.78   | 109.44  | 54.08   |
| U49430   | Cp               | EC        | ceruloplasmin                                     | ferroxidase regulating iron efflux                     | 2.39          | 1.26    | 0.53                                             | 53.84   | 19.60   | 102.14  | 55.50   | 128.50  | 19.25   |
| AF017639 | Cpxm2            | EC        | carboxypeptidase X 2 (M14 family)                 | proteolysis and peptidolysis; cell adhesion            | 2.01          | 1.43    | 0.71                                             | 145.28  | 20.02   | 204.70  | 65.60   | 292.39  | 70.91   |
| AJ006469 | Crtap            | EC        | cartilage associated protein                      | constituent of the ECM                                 | 1.43          | 1.03    | 0.72                                             | 244.42  | 36.71   | 341.42  | 90.02   | 350.66  | 53.29   |
| AJ242663 | Ctsz             | EC, Lys   | cathepsin Z                                       | proteolysis and peptidolysis                           | 1.53          | 1.38    | 0.90                                             | 114.13  | 29.71   | 127.04  | 39.50   | 175.02  | 32.34   |
| L12029   | Cxd12            | EC        | chemokine (C-X-C motif) ligand 12                 | signal transduction; growth factor                     | 2.58          | 1.68    | 0.65                                             | 57.12   | 14.39   | 87.88   | 27.86   | 147.51  | 80.49   |
| AJ242625 | Dmp1; PP         | IC, N, EC | dentin matrix protein                             | transcription factor & mineralization of ECM           | 0.45          | 0.70    | 1.55                                             | 93.62   | 50.90   | 60.31   | 18.44   | 41.95   | 13.17   |
| AA717826 | Dpt              | EC        | dermatopontin                                     | cell adhesion                                          | 2.15          | 1.72    | 0.80                                             | 42.05   | 9.32    | 52.49   | 21.36   | 90.23   | 40.82   |
| AA919594 | Ein              | EC        | elastin                                           | constituent of ECM                                     | 1.69          | 1.25    | 0.74                                             | 320.45  | 37.79   | 432.25  | 121.00  | 541.22  | 80.38   |
| X79083   | Epha7            | M         | Eph receptor A7                                   | cell adhesion                                          | 1.53          | 1.33    | 0.87                                             | 75.71   | 7.93    | 87.34   | 14.15   | 115.77  | 35.12   |
| L29454   | Fbn1             | EC        | fibrillin 1                                       | constituent of the ECM                                 | 1.85          | 1.40    | 0.75                                             | 56.28   | 10.05   | 74.58   | 28.18   | 104.23  | 31.09   |
| AI196896 | Fbg              | EC        | fibrinogen, B beta polypeptide                    | blood clotting                                         | 0.90          | 0.95    | 1.06                                             | 20.66   | 1.43    | 19.48   | 1.06    | 18.50   | 0.72    |
| M30641   | Fgf1             | EC        | fibroblast growth factor 1                        | signal transduction, cell growth                       | 0.53          | 0.71    | 1.33                                             | 237.45  | 93.48   | 178.88  | 50.23   | 126.74  | 27.89   |
| X94998   | Fmod             | EC        | fibromodulin                                      | ECM organization                                       | 2.39          | 1.34    | 0.56                                             | 271.71  | 123.95  | 484.18  | 305.30  | 649.78  | 289.05  |
| M18194   | Fn1              | EC        | fibronectin 1                                     | ECM, cell adhesion                                     | 1.82          | 1.18    | 0.65                                             | 302.33  | 114.75  | 467.86  | 129.90  | 551.28  | 153.05  |
| X59846   | Gas6             | EC        | growth arrest specific 6                          | vitamin K-dependent growth factor                      | 0.66          | 0.73    | 1.10                                             | 597.88  | 68.90   | 543.80  | 181.23  | 395.07  | 123.52  |
| X59846   | Gas6             | EC        | growth arrest specific 6                          | vitamin K-dependent growth factor                      | 0.66          | 0.73    | 1.10                                             | 597.88  | 68.90   | 543.80  | 181.23  | 395.07  | 123.52  |
| AI843313 | Gpc3             | EC        | glypican 3                                        | growth control                                         | 1.83          | 1.28    | 0.70                                             | 171.64  | 52.92   | 245.78  | 106.00  | 314.69  | 62.38   |
| D16195   | Gm; epithelin    | EC        | granulin                                          | growth factor, signal transduction                     | 1.50          | 1.25    | 0.83                                             | 161.43  | 22.26   | 193.33  | 42.72   | 241.51  | 22.04   |
| X06271   | IL5; IL-5        | EC        | interleukin 5 (eosinophil differentiation factor) | cell surface receptor linked signal transduction       | 0.90          | 0.99    | 1.10                                             | 73.47   | 3.06    | 66.50   | 3.28    | 66.01   | 6.25    |
| L12447   | Igfbp5           | EC        | insulin-like growth factor binding protein 5      | cell growth, signal transduction                       | 4.36          | 1.48    | 0.34                                             | 256.86  | 178.61  | 757.23  | 699.65  | 1119.62 | 410.93  |
| X71922   | Igf2; Mpr; M6pr  | EC        | insulin-like growth factor 2                      | growth factor, signal transduction                     | 2.87          | 1.50    | 0.52                                             | 2416.06 | 1432.42 | 4632.00 | 1996.58 | 6937.16 | 1150.94 |
| AI838737 | Igfbp4           | EC        | insulin-like growth factor binding protein 4      | cell growth, signal transduction                       | 1.18          | 1.07    | 0.91                                             | 310.28  | 17.62   | 341.01  | 17.12   | 364.62  | 34.79   |
| X76066   | Igfbp4; IGFBP-4  | EC        | insulin like growth factor binding protein 4      | cell growth, signal transduction                       | 1.24          | 1.09    | 0.88                                             | 157.80  | 15.03   | 179.79  | 14.48   | 195.22  | 25.01   |
| AV357656 | Lamb1-1          | EC        | laminin B1 subunit 1                              | ECM component                                          | 2.32          | 1.61    | 0.69                                             | 101.45  | 43.27   | 146.01  | 77.91   | 235.20  | 89.93   |
| X93347   | Lbp              | EC        | lipopolysaccharide binding protein                | lipopolysaccharide transport                           | 1.80          | 1.16    | 0.64                                             | 347.57  | 79.43   | 540.32  | 199.45  | 625.84  | 112.29  |
| AV232133 | Lox              | EC        | lysyl oxidase                                     | oxidoreductase activity                                | 1.22          | 1.06    | 0.87                                             | 68.74   | 4.51    | 79.07   | 6.3     |         |         |

## (A) extracellular

|          |                    |        |                                                  |                                                                                   |      |      |      |         |         |         |        |         |        |
|----------|--------------------|--------|--------------------------------------------------|-----------------------------------------------------------------------------------|------|------|------|---------|---------|---------|--------|---------|--------|
| X92397   | Ndph               | EC     | Norrie disease homolog                           | receptor for Norrin-Fz4 signal transduction                                       | 1.25 | 1.11 | 0.89 | 206.01  | 30.60   | 231.80  | 29.56  | 257.70  | 26.84  |
| Y09257   | Nov                | EC     | nephroblastoma overexpressed gene                | insulin-like growth factor binding activity                                       | 3.05 | 1.92 | 0.63 | 123.24  | 69.56   | 195.19  | 103.05 | 375.33  | 172.45 |
| AA592182 | Npnt               | EC     | nephronectin                                     | cell-matrix adhesion                                                              | 1.27 | 1.14 | 0.90 | 55.48   | 4.47    | 61.79   | 6.71   | 70.50   | 13.52  |
| M69196   | Pcsk1              | EC     | proprotein convertase subtilisin/kexin type 1    | proteolysis and peptidolysis                                                      | 1.40 | 1.31 | 0.94 | 99.19   | 14.61   | 105.97  | 11.33  | 138.40  | 26.81  |
| J04148   | Prf1               | EC     | perforin 1 (pore forming protein)                | cytolysis                                                                         | 0.79 | 0.89 | 1.13 | 76.02   | 7.71    | 67.20   | 6.25   | 60.10   | 4.37   |
| L27439   | Prosl              | EC     | protein S (alpha)                                | blood coagulation                                                                 | 2.16 | 1.42 | 0.66 | 109.50  | 30.86   | 166.37  | 76.61  | 236.16  | 74.31  |
| AW125478 | Prss11             | EC     | protease, serine, 11 (lgf binding)               | proteolysis and peptidolysis                                                      | 0.57 | 0.65 | 1.15 | 2573.57 | 1023.22 | 2229.81 | 361.56 | 1456.53 | 377.21 |
| Y18723   | Prss18             | EC     | protease, serine, 18                             | proteolysis and peptidolysis                                                      | 2.04 | 1.24 | 0.61 | 167.51  | 45.62   | 274.92  | 79.33  | 341.73  | 139.26 |
| AF002719 | Slpi; SLPI         | EC     | secretory leukoprotease inhibitor                | serine-type endopeptidase inhibitor                                               | 1.32 | 1.22 | 0.93 | 77.93   | 1.82    | 84.18   | 8.22   | 102.88  | 26.45  |
| AW214439 | Sparc              | EC     | secreted acidic cysteine rich glycoprotein       | ECM organization                                                                  | 1.23 | 1.13 | 0.92 | 299.27  | 15.60   | 326.71  | 24.52  | 367.85  | 45.56  |
| X92864   | Spock1             | EC     | chondroitin sulfate proteoglycan 1               | chondroitin sulfate proteoglycan regulates cell shape & growth and ECM production | 0.65 | 0.76 | 1.17 | 480.69  | 135.95  | 411.63  | 81.70  | 314.75  | 36.25  |
| AW060556 | Stab1              | M      | stabilin 1                                       | cell adhesion                                                                     | 1.58 | 1.21 | 0.77 | 81.48   | 6.77    | 106.45  | 27.34  | 128.91  | 9.12   |
| M62470   | Thbs1; TSP1        | EC     | thrombospondin                                   | cell adhesion                                                                     | 4.21 | 1.94 | 0.46 | 41.56   | 23.91   | 90.21   | 59.55  | 174.88  | 134.49 |
| U26437   | Timp3; TIMP-3      | EC     | tissue inhibitor of metalloproteinases-3         | metalloendopeptidase inhibitor                                                    | 1.99 | 1.28 | 0.64 | 918.63  | 247.64  | 1425.62 | 481.30 | 1831.61 | 276.97 |
| AV230686 | Tnc                | EC     | tenascin C                                       | ECM component, determinant of synaptic plasticity                                 | 1.97 | 1.81 | 0.92 | 13.04   | 3.39    | 14.20   | 4.29   | 25.70   | 16.14  |
| AW060819 | Twg-pending        | EC     | twisted gastrulation protein                     | signal transduction                                                               | 1.76 | 1.32 | 0.75 | 186.04  | 35.20   | 247.34  | 102.36 | 326.68  | 90.52  |
| M84487   | Vcam1              | M, EC  | vascular cell adhesion molecule 1                | cell adhesion; signal transduction                                                | 2.30 | 1.47 | 0.64 | 158.34  | 45.33   | 248.22  | 116.25 | 364.60  | 136.38 |
| AI843063 | Vwf                | EC     | Von Willebrand factor homolog                    | blood coagulation                                                                 | 3.28 | 1.68 | 0.51 | 168.21  | 106.58  | 327.83  | 189.37 | 552.33  | 238.94 |
| M89800   | Wnt6               | EC     | wingless-related MMTV integration site 6         | signaling peptide                                                                 | 1.30 | 1.06 | 0.81 | 68.05   | 8.36    | 83.81   | 14.10  | 88.75   | 12.29  |
| X62502   | Ccl4; Act-2; Mip1b | EC     | chemokine (C-C motif) ligand 4                   | signal transduction                                                               | 1.03 | 1.08 | 1.05 | 116.68  | 2.92    | 111.55  | 3.04   | 120.69  | 5.58   |
| L38580   | Gal; Galn          | EC     | galanin neuropeptide                             | neuropeptide signal transduction                                                  | 1.21 | 1.28 | 1.06 | 214.48  | 10.75   | 202.41  | 6.20   | 259.99  | 52.94  |
| M92850   | Aeg2               | IC, EC | acidic epididymal glycoprotein 2                 | unknown                                                                           | 1.05 | 0.97 | 0.93 | 8.68    | 0.22    | 9.35    | 0.34   | 9.10    | 0.41   |
| X97991   | Calca              | EC     | calcitonin/calcitonin-related polypeptide, alpha | peptide signal transduction                                                       | 0.93 | 1.02 | 1.10 | 117.83  | 6.75    | 106.82  | 5.41   | 109.17  | 5.06   |
| M17015   | Lta; Lt; Ltx       | EC     | lymphotoxin                                      | TNF-receptor ligand, cell growth and/or maintenance                               | 0.95 | 1.09 | 1.15 | 315.84  | 24.11   | 274.97  | 21.51  | 298.66  | 20.43  |
| X53257   | Ntf3; NT3          | EC     | neurotrophin-3 peptide                           | growth and/or maintenance                                                         | 1.06 | 0.90 | 0.85 | 38.51   | 3.09    | 45.08   | 3.44   | 40.75   | 2.26   |

| Genbank  | Common             | location | Description                                                                 | Function                                                 | Average Signal Intensities & Standard Deviations |         |         |         |         |         |         |         |         |  |
|----------|--------------------|----------|-----------------------------------------------------------------------------|----------------------------------------------------------|--------------------------------------------------|---------|---------|---------|---------|---------|---------|---------|---------|--|
|          |                    |          |                                                                             |                                                          | Fold changes*                                    |         |         | LMN     |         | MMN     |         | IML     |         |  |
|          |                    |          |                                                                             |                                                          | IML/LMN                                          | MMN/MMN | MMN/IML | Average | SD      | Average | SD      | Average | SD      |  |
| AF011644 | Cdkap1             | IC       | CDK2-associated protein 1                                                   | cell growth and/or maintenance                           | 0.78                                             | 0.79    | 1.01    | 793.06  | 63.54   | 784.33  | 92.13   | 619.54  | 73.28   |  |
| U49513   | Ccl9               | EC       | chemokine (C-C motif) ligand 9                                              | signal transduction                                      | 1.39                                             | 1.28    | 0.92    | 57.47   | 3.38    | 62.55   | 6.38    | 79.82   | 7.79    |  |
| U56819   | Ccr2               | M        | chemokine (C-C) receptor 2                                                  | signal transduction                                      | 1.27                                             | 1.30    | 1.02    | 31.32   | 2.43    | 30.68   | 3.55    | 39.86   | 5.74    |  |
| AV370035 | Ccr5               | M        | chemokine (C-C motif) receptor 5                                            | signal transduction                                      | 1.51                                             | 1.70    | 1.13    | 39.85   | 13.13   | 35.28   | 3.48    | 59.98   | 16.88   |  |
| AB016592 | Agr2               | EC       | anterior gradient 2 (Xenopus laevis)                                        | survival factor                                          | 0.84                                             | 0.97    | 1.15    | 56.02   | 6.39    | 48.69   | 3.52    | 47.26   | 3.92    |  |
| X77952   | Eng                | M        | endoglin                                                                    | constituent of TGF-beta signaling complex                | 1.56                                             | 1.07    | 0.69    | 543.31  | 88.88   | 789.78  | 112.17  | 847.13  | 184.77  |  |
| AI046826 | Gab1               | IC       | growth factor receptor bound protein 2-associated protein 1                 | signal transduction                                      | 1.65                                             | 1.09    | 0.66    | 313.46  | 50.75   | 473.00  | 56.21   | 516.46  | 81.88   |  |
| X65128   | Gas1               | M        | growth arrest specific 1                                                    | growth regulation                                        | 2.01                                             | 1.25    | 0.62    | 311.55  | 63.70   | 503.46  | 127.66  | 627.42  | 214.01  |  |
| AB012886 | Igfbp7             | EC       | insulin-like growth factor binding protein 7                                | regulation of growth & metabolism                        | 1.15                                             | 0.99    | 0.86    | 119.44  | 8.53    | 138.68  | 13.30   | 137.00  | 5.50    |  |
| U10531   | Skil; sno; Skir    | N        | SNO proto-oncogene                                                          | cell growth and maintenance                              | 0.88                                             | 1.00    | 1.13    | 82.17   | 2.75    | 72.64   | 2.88    | 72.61   | 5.42    |  |
| L34169   | Thpo               | EC       | thrombopoietin                                                              | hormone/cytokine, cell growth & maintenance              | 0.92                                             | 0.99    | 1.08    | 97.41   | 5.75    | 90.56   | 2.84    | 89.24   | 1.61    |  |
| X53928   | Bgn                | EC       | biglycan                                                                    | glycoprotein, binds collagen, growth and survival        | 2.82                                             | 1.60    | 0.57    | 403.42  | 157.52  | 711.40  | 431.96  | 1136.95 | 646.38  |  |
| Z16410   | Btg1               | IC       | M.musculus btg1 mRNA.                                                       | antiproliferative                                        | 1.52                                             | 1.27    | 0.83    | 102.84  | 21.00   | 123.52  | 38.34   | 156.43  | 17.41   |  |
| D83745   | Btg3               | IC       | B-cell translocation gene 3                                                 | antiproliferative                                        | 2.12                                             | 1.56    | 0.73    | 67.09   | 25.77   | 91.57   | 30.07   | 142.51  | 19.19   |  |
| L12029   | Cxcl12             | EC       | chemokine (C-X-C motif) ligand 12                                           | signal transduction; growth factor                       | 2.58                                             | 1.68    | 0.65    | 57.12   | 14.39   | 87.88   | 27.86   | 147.51  | 80.49   |  |
| M58004   | Ccl6               | EC       | chemokine (C-C motif) ligand 6                                              | signal transduction                                      | 1.31                                             | 1.21    | 0.92    | 89.51   | 15.07   | 96.99   | 8.03    | 117.22  | 23.28   |  |
| AF016697 | Dly; FY;           | M        | chemokine receptor                                                          | signal transduction                                      | 0.76                                             | 0.83    | 1.10    | 311.46  | 39.97   | 284.31  | 45.12   | 236.08  | 41.09   |  |
| U04827   | Fabp7; B-FABP      | M        | brain fatty acid-binding protein                                            | regulates Schwann cell-axon interactions                 | 3.01                                             | 1.89    | 0.63    | 628.02  | 217.67  | 998.40  | 613.73  | 1891.67 | 788.72  |  |
| M30641   | Fgf1               | EC       | fibroblast growth factor 1                                                  | signal transduction, cell growth                         | 0.53                                             | 0.71    | 1.33    | 237.45  | 93.48   | 178.88  | 50.23   | 126.74  | 27.89   |  |
| AW125390 | Fgls; Ifitm3       | M        | fragilis, interferon induced transmembrane protein 3                        | signal transduction                                      | 1.51                                             | 1.07    | 0.71    | 193.79  | 38.72   | 273.36  | 92.21   | 293.14  | 54.86   |  |
| AI841303 | Gap43              | IC, M    | growth associated protein 43                                                | regulation of growth, plasticity, synaptic release       | 2.64                                             | 2.01    | 0.76    | 562.79  | 324.58  | 740.97  | 168.10  | 1487.40 | 228.11  |  |
| X59846   | Gas6               | EC       | growth arrest specific 6                                                    | vitamin K-dependent growth factor                        | 0.66                                             | 0.73    | 1.10    | 597.88  | 68.90   | 543.80  | 181.23  | 395.07  | 123.52  |  |
| M94450   | Grb7               | IC       | growth factor receptor bound protein 7                                      | signal transduction                                      | 0.87                                             | 0.96    | 1.10    | 336.12  | 26.21   | 305.31  | 20.53   | 293.12  | 12.56   |  |
| D16195   | Gm; epithelin      | EC       | granulin                                                                    | growth factor, signal transduction                       | 1.50                                             | 1.25    | 0.83    | 161.43  | 22.26   | 193.33  | 42.72   | 241.51  | 22.04   |  |
| X71922   | Igf2; Mpr; M6pr    | EC       | insulin-like growth factor 2                                                | growth factor, signal transduction                       | 2.87                                             | 1.50    | 0.52    | 2416.06 | 1432.42 | 4632.00 | 1996.58 | 6937.16 | 1150.94 |  |
| X76066   | Igfbp4; IGFBP-4    | M        | insulin-like growth factor binding protein 4                                | cell growth, signal transduction                         | 1.24                                             | 1.09    | 0.88    | 157.80  | 15.03   | 179.79  | 14.48   | 195.22  | 25.01   |  |
| L12447   | Igfbp5             | EC       | insulin-like growth factor binding protein 5                                | cell growth, signal transduction                         | 4.36                                             | 1.48    | 0.34    | 256.86  | 178.61  | 757.23  | 699.65  | 1119.62 | 410.93  |  |
| Y09864   | Ifnar2             | M        | interferon (alpha and beta) receptor 2                                      | signal transduction                                      | 1.20                                             | 1.12    | 0.93    | 58.65   | 4.06    | 63.08   | 7.55    | 70.55   | 4.98    |  |
| U53696   | Il10rb             | M        | interleukin 10 receptor, beta                                               | cell surface receptor linked signal transduction         | 1.65                                             | 1.34    | 0.81    | 570.21  | 103.84  | 703.19  | 205.97  | 938.78  | 198.67  |  |
| AA608387 | Il13ra1            | M        | interleukin 13 receptor, alpha 1                                            | cell surface receptor linked signal transduction         | 1.72                                             | 1.25    | 0.72    | 38.06   | 7.45    | 52.55   | 17.22   | 65.54   | 12.06   |  |
| M26271   | Il2R               | M        | Mouse interleukin 2 receptor gene, 5' end.                                  | cell surface receptor linked signal transduction         | 0.85                                             | 0.93    | 1.10    | 25.86   | 2.65    | 23.43   | 2.05    | 21.89   | 1.19    |  |
| X06271   | Il5; Il-5          | EC       | interleukin 5 (eosinophil differentiation factor).                          | cell surface receptor linked signal transduction         | 0.90                                             | 0.99    | 1.10    | 73.47   | 3.06    | 66.50   | 3.28    | 66.01   | 6.25    |  |
| AF022889 | Ltbp1              | EC       | latent transforming growth factor beta binding protein 1                    | TGF beta receptor signal transduction                    | 1.55                                             | 1.23    | 0.80    | 44.96   | 4.15    | 56.32   | 11.38   | 69.47   | 13.93   |  |
| AI849993 | Ly6h               | M        | lymphocyte antigen 6 complex, locus H                                       | cell surface glycoprotein, growth regulation             | 1.42                                             | 1.23    | 0.86    | 369.25  | 32.02   | 427.75  | 66.57   | 524.09  | 59.88   |  |
| AI852838 | Meg3               | M        | maternally expressed gene 3                                                 | growth suppressor                                        | 0.75                                             | 0.85    | 1.13    | 111.93  | 18.26   | 98.68   | 10.00   | 84.00   | 7.21    |  |
| AF041335 | Myoc; TIGR         | EC       | trabecular meshwork induced glucocorticoid protein                          | inhibitor of neurite outgrowth                           | 1.41                                             | 1.15    | 0.82    | 37.87   | 3.64    | 46.43   | 9.49    | 53.51   | 12.46   |  |
| AI642048 | Nfkbia             | IC, N    | clear factor of kappa light chain gene enhancer in B-cells inhibitor, alpha | regulation of cell proliferation                         | 1.37                                             | 1.08    | 0.79    | 166.62  | 14.47   | 210.72  | 34.29   | 227.78  | 43.86   |  |
| Y09257   | Nov                | EC       | nephroblastoma overexpressed gene                                           | insulin-like growth factor binding activity              | 3.05                                             | 1.92    | 0.63    | 123.24  | 69.56   | 195.19  | 103.05  | 375.33  | 172.45  |  |
| AW125478 | Prs11              | EC       | protease, serine, 11 (Igf binding)                                          | proteolysis and peptidolysis, cell growth                | 0.57                                             | 0.65    | 1.15    | 2573.57 | 1023.22 | 2229.81 | 361.56  | 1456.53 | 377.21  |  |
| AV007820 | S100a13            | M        | S100 calcium binding protein A13                                            | cell growth and/or maintenance                           | 1.92                                             | 1.34    | 0.70    | 352.57  | 28.25   | 505.90  | 75.51   | 677.77  | 233.71  |  |
| X66449   | S100a6             | M        | S100 calcium binding protein A6 (calcylin)                                  | cell growth and/or maintenance                           | 5.62                                             | 2.74    | 0.49    | 139.12  | 43.57   | 285.30  | 137.65  | 782.38  | 787.07  |  |
| X92864   | Spock1             | EC       | parc/osteonectin, cwcv and kazal-like domains proteoglycan 1                | regulates cell shape & growth and ECM production         | 0.65                                             | 0.76    | 1.17    | 480.69  | 135.95  | 411.63  | 81.70   | 314.75  | 36.25   |  |
| U02487   | Sspn               | M        | sarcospan                                                                   | cell growth and/or maintenance                           | 1.59                                             | 1.24    | 0.78    | 78.85   | 27.53   | 100.99  | 18.30   | 125.26  | 23.10   |  |
| X97817   | Sema5a             | M        | semaphorin 5A                                                               | axon guidance receptor activity                          | 1.16                                             | 1.09    | 0.94    | 22.28   | 1.57    | 23.76   | 1.23    | 25.86   | 1.92    |  |
| AV230686 | Tnc                | EC       | tenascin C                                                                  | ECM component, determinant of synaptic plasticity        | 1.97                                             | 1.81    | 0.92    | 13.04   | 3.39    | 14.20   | 4.29    | 25.70   | 16.14   |  |
| AF039601 | Tgfb3              | M        | transforming growth factor, beta receptor III                               | signal transduction                                      | 0.81                                             | 0.84    | 1.04    | 135.54  | 11.61   | 130.17  | 16.02   | 109.79  | 9.57    |  |
| X87128   | Tnfrsf1b; p75      | M        | p75 TNF receptor                                                            | signal transduction, neurotransmitter release, apoptosis | 1.31                                             | 1.19    | 0.91    | 72.35   | 3.31    | 79.84   | 13.56   | 94.75   | 15.63   |  |
| X62502   | Ccl4; Act-2; Mip1t | EC       | chemokine (C-C motif) ligand 4                                              | signal transduction                                      | 1.03                                             | 1.08    | 1.05    | 116.68  | 2.92    | 111.55  | 3.04    | 120.69  | 5.58    |  |
| D13695   | Il1r1              | M        | interleukin 1 receptor-like 1                                               | signal transduction, synaptic plasticity                 | 1.14                                             | 1.24    | 1.09    | 18.46   | 1.25    | 16.99   | 0.80    | 21.10   | 4.27    |  |
| M29697   | Il7r               | M        | interleukin 7 receptor                                                      | cell surface receptor linked signal transduction         | 1.14                                             | 1.20    | 1.05    | 20.22   | 2.09    | 19.20   | 1.31    | 22.99   | 3.12    |  |
| M17015   | Lta; LT; Ltx       | EC       | lymphotoxin                                                                 | TNF-receptor ligand, cell growth and/or maintenance      | 0.95                                             | 1.09    | 1.15    | 315.84  | 24.11   | 274.97  | 21.51   | 298.66  | 20.43   |  |
| X53257   | Ntf3; NT3          | EC       | neurotrophin-3 peptide                                                      | growth and/or maintenance                                | 1.06                                             | 0.90    | 0.85    | 38.51   | 3.09    | 45.08   | 3.44    | 40.75   | 2.26    |  |

| Genbank  | Common       | location | Description                                         | Function                                               | Fold changes* |      |         | SD     |
|----------|--------------|----------|-----------------------------------------------------|--------------------------------------------------------|---------------|------|---------|--------|
|          |              |          |                                                     |                                                        | IML           | LMML | MMN/MMN |        |
| X15052   | Ncam1        | M, EC    | neural cell adhesion molecule 1                     | cell adhesion, synaptic transmission, plasticity       | 2.50          | 1.83 | 0.73    | 178.60 |
| X13986   | Spp1         | EC       | secreted phosphoprotein 1                           | cell adhesion, cytokine activity                       | 0.51          | 0.69 | 1.36    | 425.02 |
| AB009673 | Adam23       | M        | disintegrin & metalloprotease domain 23             | proteolysis and peptidolysis                           | 0.76          | 0.78 | 1.03    | 53.01  |
| X97227   | Cd53         | M        | CD53 antigen                                        | modulates cell-ECM interaction                         | 2.24          | 1.99 | 0.89    | 53.01  |
| D13664   | Osf2-pending | EC       | periostin                                           | cell adhesion, transcription factor                    | 3.07          | 2.67 | 0.87    | 78.27  |
| AV378129 | Ppfbp2       | IC       | tyrosine phosphatase receptor F interacting proteir | signal transduction                                    | 1.15          | 1.09 | 0.95    | 0.72   |
| AI891912 | Pvr13        | M        | poliovirus receptor-related 3                       | cell adhesion                                          | 1.28          | 1.22 | 0.95    | 1.31   |
| X91144   | Selp1        | M        | selectin, platelet (p-selectin) ligand              | cell adhesion                                          | 1.16          | 1.14 | 0.98    | 13.25  |
| AB008180 | Pcdha13      | M        | protocadherin alpha 13                              | cell adhesion                                          | 0.87          | 0.98 | 1.12    | 184.09 |
| AF006196 | Adam15       | M, EC    | a disintegrin and metalloproteinase domain 15       | membrane surface & ECM proteolysis, cell adhesion      | 0.83          | 0.92 | 1.10    | 12.35  |
| X63535   | Axl          | M        | AXL receptor tyrosine kinase                        | signal transduction                                    | 1.17          | 1.09 | 0.93    | 10.22  |
| U48797   | Astn1        | M        | astrotactin 1                                       | cell adhesion                                          | 1.23          | 1.10 | 0.89    | 107.57 |
| AF007802 | Bysl         | IC       | bystin-like                                         | cell adhesion                                          | 0.87          | 0.94 | 1.08    | 0.80   |
| AI847784 | Cd34         | M        | CD34 antigen                                        | cell adhesion                                          | 1.35          | 1.19 | 0.88    | 26.54  |
| L08115   | Cd9          | M        | CD9 antigen                                         | cell adhesion                                          | 2.16          | 1.70 | 0.79    | 559.12 |
| AI853217 | Cdh5         | M        | cadherin 5                                          | cell adhesion                                          | 1.56          | 1.15 | 0.74    | 16.02  |
| AF017639 | Cpxm2        | EC       | carboxypeptidase X 2 (M14 family)                   | proteolysis and peptidolysis; cell adhesion            | 2.01          | 1.43 | 0.71    | 70.91  |
| AA717826 | Dpt          | EC       | dermatopontin                                       | cell adhesion                                          | 2.15          | 1.72 | 0.80    | 40.82  |
| AW228162 | Dsc2         | M        | desmocollin 2                                       | cell adhesion                                          | 1.25          | 1.17 | 0.94    | 1.51   |
| U57686   | Efs          | M        | embryonal Fyn-associated substrate                  | cell adhesion                                          | 1.13          | 1.06 | 0.94    | 7.78   |
| X79083   | Epha7        | M        | Eph receptor A7                                     | cell adhesion                                          | 1.53          | 1.33 | 0.87    | 35.12  |
| M18194   | Fn1          | EC       | fibronectin 1                                       | ECM, cell adhesion                                     | 1.82          | 1.18 | 0.65    | 153.05 |
| AI841303 | Gap43        | IC, M    | growth associated protein 43                        | regulation of growth, synaptic plasticity and release  | 2.64          | 2.01 | 0.76    | 228.11 |
| AI853261 | Mcam         | M        | melanoma cell adhesion molecule                     | cell adhesion                                          | 0.50          | 0.64 | 1.27    | 203.34 |
| AA592182 | Npnt         | EC       | nephronectin                                        | cell-matrix adhesion                                   | 1.27          | 1.14 | 0.90    | 13.52  |
| X97817   | Sema5a       | M        | semaphorin 5A                                       | axon guidance receptor activity                        | 1.16          | 1.09 | 0.94    | 1.92   |
| M62470   | Thbs1; TSP1  | EC       | thrombospondin                                      | cell adhesion                                          | 4.21          | 1.94 | 0.46    | 134.49 |
| AV230686 | Tnc          | EC       | tenascin C                                          | ECM component, determinant of synaptic plasticity      | 1.97          | 1.81 | 0.92    | 16.14  |
| AW125880 | Tmem4        | M        | transmembrane protein 4                             | regulates neurite outgrowth, CySk interactions         | 1.30          | 1.05 | 0.81    | 27.69  |
| AF039601 | Tgfb3        | M        | transforming growth factor, beta receptor III       | signal transduction                                    | 0.81          | 0.84 | 1.04    | 9.57   |
| M84487   | Vcam1        | M, EC    | vascular cell adhesion molecule 1                   | cell adhesion; signal transduction                     | 2.30          | 1.47 | 0.64    | 136.38 |
| AA880988 | Xlkd1        | M        | extra cellular link domain-containing 1             | glycosaminoglycan catabolism, cell adhesion, signaling | 1.43          | 1.21 | 0.85    | 10.43  |
| AJ001373 | Itgb1bp1     | IC       | integrin beta 1 binding protein 1                   | integrin depended cell-matrix adhesion                 | 0.91          | 0.85 | 0.94    | 31.24  |
| U70209   | Pkd1         | M        | polycystic kidney disease 1 homolog                 | ion channel, signaling, cell adhesion, Ca homostasis   | 1.05          | 0.96 | 0.91    | 4.26   |



| Genbank  | Common             | location | Description                                            | Function                                                 | Fold changes* |         |         | Average Signal Intensities & Standard Deviation |         |         |        |         |        |
|----------|--------------------|----------|--------------------------------------------------------|----------------------------------------------------------|---------------|---------|---------|-------------------------------------------------|---------|---------|--------|---------|--------|
|          |                    |          |                                                        |                                                          | IML/LMN       | MML/MMN | MMN/MMN | LMN                                             |         | MMN     |        | IML     |        |
|          |                    |          |                                                        |                                                          |               |         |         | Average                                         | SD      | Average | SD     | Average | SD     |
| AW125626 | Cnn3               | CySk     | calponin 3, acidic                                     | actin binding protein                                    | 1.71          | 1.28    | 0.75    | 1178.00                                         | 88.00   | 1566.71 | 274.84 | 2013.12 | 189.38 |
| AB011678 | Dcx                | CySk     | doublecortin                                           | cytoskeletal complex constituent                         | 1.27          | 1.26    | 0.99    | 91.95                                           | 15.34   | 92.56   | 14.08  | 116.43  | 6.79   |
| AJ223362 | Myh7               | CySk     | myosin, heavy polypeptide 7                            | cytoskeletal organization                                | 1.52          | 1.44    | 0.95    | 84.79                                           | 7.50    | 89.36   | 8.53   | 128.78  | 33.19  |
| AW047320 | Ndel1              | IC       | nuclear distribution gene E-like homolog 1             | retrograde axon transport, CySk interacting protein      | 0.75          | 0.84    | 1.13    | 1633.64                                         | 41.33   | 1444.58 | 139.72 | 1217.07 | 149.68 |
| M35131   | Nefh               | CySk     | neurofilament, heavy polypeptide                       | cytoskeleton organization & biogenesis                   | 0.49          | 0.64    | 1.32    | 6286.97                                         | 1515.16 | 4778.15 | 796.94 | 3080.17 | 637.30 |
| M60474   | Marcks             | M        | myristoylated alanine rich PKC substrate               | actin & calmodulin binding                               | 2.59          | 1.74    | 0.67    | 277.09                                          | 71.64   | 413.22  | 145.09 | 718.12  | 87.82  |
| U38967   | Tmsb4x; Ptmb4      | CySk     | thymosin beta 4                                        | cytoskeleton organization and biogenesis                 | 1.32          | 1.32    | 1.00    | 1297.34                                         | 183.81  | 1297.78 | 158.37 | 1715.36 | 245.37 |
| AV149007 | Pdlim1             | IC       | PDZ and LIM domain 1 (elfin)                           | adaptor, signal transduction, CySk interactions          | 0.85          | 0.96    | 1.14    | 454.49                                          | 32.25   | 399.01  | 35.08  | 384.86  | 23.35  |
| X60671   | Vil2               | CySk     | villin 2                                               | actin filament-plasma membrane linker                    | 1.43          | 1.05    | 0.73    | 123.47                                          | 5.70    | 168.05  | 29.09  | 175.96  | 18.67  |
| M12347   | Acta1; Acts        | CySk     | skeletal alpha-actin gene                              | structural constituent of cytoskeleton                   | 1.42          | 1.29    | 0.91    | 54.25                                           | 4.98    | 59.67   | 15.13  | 76.91   | 16.69  |
| AA791742 | Actr2              | CySk     | ARP2 actin-related protein 2 homolog (yeast)           | structural constituent of cytoskeleton                   | 0.80          | 0.89    | 1.12    | 111.20                                          | 14.32   | 99.26   | 8.91   | 88.66   | 11.84  |
| AW212775 | Arpc1b             | CySk     | actin related protein 2/3 complex, subunit 1B          | cytoskeletal organization                                | 1.24          | 1.16    | 0.93    | 328.40                                          | 33.43   | 351.79  | 49.38  | 407.25  | 36.92  |
| AW124113 | Basp1              | N, M     | brain abundant, membrane attached signal protein 1     | transcriptional regulation, signal transduction          | 1.62          | 1.33    | 0.83    | 1271.05                                         | 333.61  | 1539.62 | 568.63 | 2053.11 | 430.89 |
| AI844806 | Cdc42ep4           | IC, CySk | CDC42 effector protein (Rho GTPase binding) 4          | signal transduction                                      | 1.36          | 1.20    | 0.88    | 209.62                                          | 17.05   | 238.17  | 53.92  | 286.05  | 36.02  |
| AF098508 | Dctn3              | CySk     | dyncytin 3                                             | intracellular transport                                  | 0.74          | 0.77    | 1.03    | 1485.05                                         | 66.47   | 1439.10 | 264.65 | 1105.54 | 246.28 |
| AF063229 | Dncic1             | CySk     | dynein, cytoplasmic, intermediate chain 1              | microtubule-based movement                               | 0.82          | 0.89    | 1.08    | 3046.25                                         | 323.57  | 2818.23 | 169.04 | 2503.33 | 345.42 |
| AI836140 | Epln-pending       | CySk     | epithelial protein lost in neoplasm                    | cytoskeletal organization                                | 1.37          | 1.17    | 0.86    | 228.24                                          | 15.28   | 266.63  | 45.98  | 312.34  | 42.64  |
| AW123852 | Gphn               | IC, CySk | gephyrin                                               | clusters glycine receptor & other synaptic proteins      | 0.70          | 0.83    | 1.19    | 599.89                                          | 85.21   | 506.12  | 83.51  | 421.63  | 81.31  |
| J04953   | Gsn; MGC28083      | CySk     | gelsolin                                               | cytoskeletal organization                                | 2.85          | 1.57    | 0.55    | 259.83                                          | 139.08  | 471.13  | 244.94 | 739.86  | 331.42 |
| AF055665 | Kns2               | IC, CySk | kinesin 2                                              | microtubule-based movement                               | 0.78          | 0.93    | 1.19    | 3500.63                                         | 427.70  | 2929.70 | 128.78 | 2729.79 | 383.05 |
| D89902   | Krtap6-2; HGTpII.4 | CySk     | high-glycine tyrosine keratin type II.4                | intermediate filament of cytoskeleton                    | 0.87          | 0.98    | 1.12    | 123.74                                          | 13.17   | 110.61  | 3.14   | 107.85  | 7.69   |
| AW122780 | Lasp1              | IC       | LIM and SH3 protein 1                                  | signal transduction, actin binding, CySk organization    | 1.38          | 1.13    | 0.82    | 207.96                                          | 31.98   | 252.98  | 27.34  | 286.94  | 41.36  |
| X86569   | Limk1              | IC       | LIM-domain containing, protein kinase                  | cytoskeletal regulation                                  | 0.92          | 0.97    | 1.06    | 1631.60                                         | 113.93  | 1539.20 | 55.55  | 1493.29 | 31.39  |
| D49691   | Lsp1               | CySk     | lymphocyte specific 1                                  | filamentous-actin binding protein                        | 1.48          | 1.27    | 0.86    | 74.70                                           | 6.84    | 86.76   | 15.92  | 110.43  | 27.31  |
| U51196   | Mapre1             | CySk     | microtubule-associated protein, RP/EB family, member 1 | regulates microtubule dynamics                           | 1.25          | 1.14    | 0.91    | 1352.11                                         | 115.63  | 1489.44 | 159.97 | 1694.15 | 207.29 |
| M55424   | NF-L               | CySk     | neurofilament, light polypeptide                       | intermediate filament of cytoskeletal                    | 0.74          | 0.86    | 1.16    | 541.09                                          | 63.88   | 464.87  | 84.08  | 399.66  | 73.40  |
| D83966   | Ptpn13             | IC, CySk | protein tyrosine phosphatase, non-receptor type 13     | signal transduction                                      | 1.61          | 1.33    | 0.82    | 98.83                                           | 11.04   | 119.84  | 33.50  | 159.26  | 33.21  |
| AW122911 | Ssx2ip             | CySk     | synovial sarcoma, X breakpoint 2 interacting protein   | cytoskeletal/protein at cell-cell adherens junction      | 0.70          | 0.86    | 1.24    | 620.11                                          | 122.68  | 501.98  | 74.79  | 434.20  | 66.26  |
| AI838080 | Stmn1              | CySk     | stathmin 1                                             | tubulin binding protein, maintenance of axonal integrity | 1.58          | 1.24    | 0.78    | 3319.71                                         | 750.83  | 4244.50 | 857.73 | 5254.97 | 540.08 |
| AF105222 | Stmn4              | CySk     | stathmin-like 4                                        | tubulin binding protein                                  | 1.49          | 1.28    | 0.86    | 859.08                                          | 109.32  | 1000.82 | 137.06 | 1278.05 | 253.71 |
| AW125880 | Tmem4              | M        | transmembrane protein 4                                | regulates neurite outgrowth, CySk interactions           | 1.30          | 1.05    | 0.81    | 157.77                                          | 28.05   | 195.17  | 28.47  | 205.33  | 27.69  |
| AI846797 | Tmod3              | CySk     | tropomodulin 3                                         | actin filament organization                              | 1.59          | 1.15    | 0.72    | 1405.34                                         | 323.17  | 1948.56 | 668.69 | 2237.73 | 554.87 |
| AI835858 | Tpm4               | CySk     | tropomyosin 4                                          | actin organization                                       | 2.17          | 1.55    | 0.71    | 375.75                                          | 120.52  | 527.02  | 133.91 | 815.36  | 283.61 |
| X13297   | Acta2              | CySk     | actin, alpha 2, smooth muscle, aorta                   | structural constituent of cytoskeleton                   | 3.47          | 0.73    | 0.21    | 178.52                                          | 213.79  | 841.89  | 582.42 | 618.77  | 789.78 |
| X03491   | Krt2-4             | CySk     | keratin complex 2, basic, gene 4                       | intermediate filament of cytoskeleton                    | 0.89          | 1.01    | 1.13    | 420.59                                          | 35.98   | 373.56  | 23.64  | 375.73  | 21.54  |
| AV245272 | Vim                | CySk     | vimentin                                               | intermediate filament of the cytoskeleton                | 0.94          | 1.08    | 1.15    | 252.09                                          | 15.26   | 219.41  | 20.21  | 236.29  | 15.61  |

## (E) endomembrane

| Genbank  | Common     | location | Description                                       | Function                                            | Fold changes* |         |        | Average Signal Intensities & Standard Deviations |        |         |        |         |        |
|----------|------------|----------|---------------------------------------------------|-----------------------------------------------------|---------------|---------|--------|--------------------------------------------------|--------|---------|--------|---------|--------|
|          |            |          |                                                   |                                                     | IML/LMN       | MML/MMN | MN/MMN | LMN                                              |        | MMN     |        | IML     |        |
|          |            |          |                                                   |                                                     |               |         |        | Average                                          | SD     | Average | SD     | Average | SD     |
| AI020792 | Copg1      | ER, G    | coatamer protein, subunit gamma 1                 | intracellular protein transport                     | 0.76          | 0.81    | 1.06   | 780.64                                           | 90.44  | 736.29  | 58.83  | 595.39  | 104.21 |
| AV122030 | Dscr3      | IC       | Down syndrome critical region gene 3              | intracellular protein transport                     | 0.84          | 0.89    | 1.06   | 879.30                                           | 70.82  | 829.89  | 45.37  | 738.35  | 39.51  |
| AW047320 | Ndel1      | IC       | nuclear distribution gene E-like homolog          | retrograde axon transport, CySk interacting protein | 0.75          | 0.84    | 1.13   | 1633.64                                          | 41.33  | 1444.58 | 139.72 | 1217.07 | 149.68 |
| AI835968 | Rin2       | IC       | Ras and Rab interactor 2                          | secretion, vesicular transport, signaling           | 1.82          | 1.39    | 0.76   | 317.55                                           | 40.33  | 416.24  | 120.04 | 578.20  | 85.36  |
| U70859   | Slc7a3     | M        | cationic amino acid transporter, y+ system        | glutamate symporter                                 | 1.23          | 1.25    | 1.01   | 127.00                                           | 12.78  | 125.27  | 11.30  | 156.03  | 15.10  |
| AW120567 | Snx9       | IC       | sorting nexin 9                                   | intracellular protein transport, endocytosis        | 1.24          | 1.21    | 0.98   | 915.91                                           | 25.75  | 935.24  | 100.99 | 1131.83 | 129.00 |
| Y11896   | Chic1      | G        | cysteine-rich hydrophobic domain 1                | Golgi to plasma membrane transport                  | 0.80          | 0.92    | 1.16   | 98.19                                            | 11.29  | 84.87   | 3.52   | 78.33   | 1.25   |
| AI840975 | Cltc       | IC       | clathrin, heavy polypeptide (Hc)                  | coat protein for intracellular transport            | 0.85          | 1.00    | 1.17   | 4798.22                                          | 170.52 | 4097.58 | 450.09 | 4077.26 | 227.01 |
| X64070   | M6pr       | lys      | inositol 3-O-phosphate receptor, cation dependent | intracellular protein transport                     | 0.80          | 0.98    | 1.23   | 36.17                                            | 2.86   | 29.44   | 2.41   | 28.84   | 2.83   |
| AF035643 | Vamp5      | M        | vesicle-associated membrane protein 5             | vesicular trafficking & transport, secretion        | 1.44          | 1.12    | 0.77   | 222.48                                           | 24.34  | 287.19  | 51.93  | 320.96  | 40.05  |
| AF053724 | Vamp8      | IC       | vesicle-associated membrane protein 8             | functions as vesicle SNARE in vesicle trafficking   | 1.54          | 1.10    | 0.71   | 125.43                                           | 25.47  | 176.33  | 61.44  | 193.64  | 28.74  |
| AV157222 | Vapa       | ER       | vesicle-associated membrane protein A             | vesicular trafficking & transport                   | 0.81          | 0.97    | 1.19   | 20.16                                            | 1.91   | 16.95   | 2.38   | 16.37   | 0.46   |
| U47024   | Vps35      |          | vacuolar protein sorting 35                       | lysosomal protein-sorting pathway                   | 0.77          | 0.96    | 1.25   | 1844.55                                          | 180.76 | 1471.02 | 290.11 | 1418.19 | 162.95 |
| AI843212 | Copz2      | IC       | coatamer protein complex, subunit zeta 2          | intracellular protein transport                     | 1.30          | 1.04    | 0.80   | 159.79                                           | 20.74  | 199.69  | 44.31  | 207.98  | 15.03  |
| AW046162 | Scamp2     | IC       | secretory carrier membrane protein 2              | protein transport                                   | 1.17          | 1.03    | 0.89   | 170.35                                           | 15.38  | 192.10  | 14.94  | 198.49  | 6.11   |
| AF019045 | VAT; VAcHT | M        | vesicular acetylcholine transporter               | neurotransmitter transport                          | 0.27          | 0.37    | 1.35   | 541.45                                           | 391.16 | 400.26  | 315.44 | 147.44  | 28.89  |
| AJ250489 | Ramp1      | M        | receptor (calcitonin) activity modifying protein  | receptor transport and activity                     | 1.03          | 0.83    | 0.80   | 436.50                                           | 36.06  | 543.29  | 50.16  | 449.28  | 73.30  |

| Genbank  | Common         | location | Description                                          | Function                                                 | Fold changes*  |         |         | Average Signal Intensities & Standard Deviation |        |         |        |         |         |
|----------|----------------|----------|------------------------------------------------------|----------------------------------------------------------|----------------|---------|---------|-------------------------------------------------|--------|---------|--------|---------|---------|
|          |                |          |                                                      |                                                          | IML/LMN/ML/MLL | MMN/MLN | MMN/MLN | LMN                                             |        | MMN     |        | IML     |         |
|          |                |          |                                                      |                                                          |                |         |         | Average                                         | SD     | Average | SD     | Average | SD      |
| AB010149 | Adcyap1; PACAP | EC       | PACAP ligand precursor                               | neuropeptide hormone                                     | 3.60           | 3.08    | 0.86    | 211.08                                          | 190.76 | 246.59  | 102.66 | 760.66  | 389.44  |
| M55181   | Penk1          | EC       | preproenkephalin 1                                   | neuropeptide signal transduction                         | 3.15           | 2.43    | 0.77    | 1506.34                                         | 665.99 | 1950.34 | 586.98 | 4748.73 | 1129.00 |
| D17584   | Tac1           | EC       | tachykinin 1                                         | neuropeptide signal transduction                         | 6.31           | 5.41    | 0.86    | 67.04                                           | 29.24  | 78.17   | 72.89  | 422.82  | 503.80  |
| X61448   | Cbin1          | EC       | cerebellin 1 precursor protein                       | neuropeptide, unknown function                           | 0.85           | 0.44    | 0.52    | 464.56                                          | 76.34  | 895.38  | 258.83 | 395.70  | 37.93   |
| L38580   | Gal; Galn      | EC       | galanin neuropeptide                                 | neuropeptide signal transduction                         | 1.21           | 1.28    | 1.06    | 214.48                                          | 10.75  | 202.41  | 6.20   | 259.99  | 52.94   |
| X97991   | Calca          | EC       | calcitonin/calcitonin-related polypeptide, alpha     | peptide signal transduction                              | 0.93           | 1.02    | 1.10    | 117.83                                          | 6.75   | 106.82  | 5.41   | 109.17  | 5.06    |
| M17640   | Chma1          | M        | cholinergic receptor, nicotinic, alpha polypeptide 1 | synaptic transmission                                    | 0.95           | 1.04    | 1.10    | 31.37                                           | 0.97   | 28.50   | 1.76   | 29.77   | 0.85    |
| AV372577 | Npy2r          | M        | neuropeptide Y receptor Y2                           | neuropeptide signal transduction                         | 1.91           | 1.89    | 0.99    | 234.17                                          | 27.65  | 235.89  | 14.57  | 446.90  | 174.57  |
| AF008914 | Sstr2          | M        | somatostatin receptor 2                              | signal transduction                                      | 1.71           | 1.60    | 0.94    | 53.62                                           | 2.70   | 57.30   | 4.95   | 91.86   | 23.09   |
| U51908   | Ntsr2          | M        | neurotensin receptor 2                               | signal transduction, neuromodulation                     | 1.17           | 0.99    | 0.85    | 893.37                                          | 66.75  | 1046.40 | 93.86  | 1041.15 | 107.83  |
| X66117   | Grik2          | M        | glutamate receptor, ionotropic, kainate 2 (beta 2)   | synaptic transmission                                    | 0.82           | 0.87    | 1.05    | 44.81                                           | 6.24   | 42.48   | 4.18   | 36.85   | 2.07    |
| AF004927 | Oprs1          | M, ER    | opioid receptor, sigma 1                             | opioid signal transduction, lipid biosynthesis           | 0.71           | 0.84    | 1.19    | 466.56                                          | 54.52  | 392.24  | 80.55  | 330.22  | 64.27   |
| AI841303 | Gap43          | IC, M    | growth associated protein 43                         | regulation of growth, synaptic plasticity and release    | 2.64           | 2.01    | 0.76    | 562.79                                          | 324.58 | 740.97  | 168.10 | 1487.40 | 228.11  |
| X81202   | Glrb           | M        | glycine receptor, beta subunit                       | synaptic transmission                                    | 0.71           | 0.96    | 1.35    | 3932.12                                         | 426.83 | 2914.62 | 700.03 | 2809.71 | 652.86  |
| AW123852 | Gphn           | IC       | gephyrin                                             | clusters glycine receptor & other synaptic proteins      | 0.70           | 0.83    | 1.19    | 599.89                                          | 85.21  | 506.12  | 83.51  | 421.63  | 81.31   |
| X87128   | Tnfrsf1b; p75  | M        | p75 TNF receptor                                     | signal transduction, neurotransmitter release, apoptosis | 1.31           | 1.19    | 0.91    | 72.35                                           | 3.31   | 79.84   | 13.56  | 94.75   | 15.63   |
| Y15798   | Gprk6          | IC       | G protein-coupled receptor kinase 6                  | signal transduction, receptor endocytosis                | 1.32           | 1.18    | 0.90    | 278.81                                          | 28.69  | 311.47  | 36.16  | 367.82  | 49.89   |
| D13695   | Il1r1          | M        | interleukin 1 receptor-like 1                        | signal transduction, synaptic plasticity                 | 1.14           | 1.24    | 1.09    | 18.46                                           | 1.25   | 16.99   | 0.80   | 21.10   | 4.27    |
| X15052   | Ncam1          | M        | neural cell adhesion molecule 1                      | cell adhesion, synaptic transmission, plasticity         | 2.50           | 1.83    | 0.73    | 459.98                                          | 81.79  | 629.06  | 93.95  | 1148.35 | 178.60  |
| AB026806 | Syt5           | IC       | synaptotagmin 5                                      | synaptic vesicle & secretory granule exocytosis          | 1.43           | 1.39    | 0.97    | 321.25                                          | 33.69  | 332.33  | 52.61  | 460.96  | 62.90   |
| U10355   | syt4           | IC       | synaptotagmin 4                                      | vesicular trafficking and exocytosis                     | 0.56           | 1.04    | 1.87    | 55.29                                           | 18.40  | 29.61   | 6.14   | 30.86   | 10.34   |
| D37793   | Syt2           | IC       | synaptotagmin 2                                      | synaptic vesicle membrane, Ca-binding protein            | 0.84           | 0.95    | 1.12    | 78.81                                           | 8.26   | 70.07   | 3.76   | 66.39   | 5.41    |
| AV157222 | Vapa           | IC       | vesicle-associated membrane protein A                | vesicular trafficking & transport                        | 0.81           | 0.97    | 1.19    | 20.16                                           | 1.91   | 16.95   | 2.38   | 16.37   | 0.46    |
| AF004428 | Tpd52l1        | IC       | tumor protein D52-like 1                             | (dis)assembly of endosomal SNARE complexes               | 0.26           | 0.49    | 1.86    | 256.77                                          | 181.92 | 138.38  | 77.75  | 67.58   | 10.80   |
| AF115848 | Unc13h1        | IC       | unc13 homolog (C. elegans) 1                         | regulates SNARE complex assembly                         | 1.19           | 1.12    | 0.94    | 15.70                                           | 1.37   | 16.76   | 2.28   | 18.73   | 1.13    |
| AF019045 | VAT; VACHT     | M        | vesicular acetylcholine transporter                  | neurotransmitter transport                               | 0.27           | 0.37    | 1.35    | 541.45                                          | 391.16 | 400.26  | 315.44 | 147.44  | 28.89   |

## (G) ion channel

| Genbank Common location |          |       | Description                                                | Function                                              | Fold changes* |         |         | Average Signal Intensities & Standard Deviations |         |        |         |        |       |
|-------------------------|----------|-------|------------------------------------------------------------|-------------------------------------------------------|---------------|---------|---------|--------------------------------------------------|---------|--------|---------|--------|-------|
|                         |          |       |                                                            |                                                       | IML/LMN       | MML/MMN | MN/MMN  | LMN                                              |         | MMN    |         | IML    |       |
|                         |          |       |                                                            |                                                       |               |         | Average | SD                                               | Average | SD     | Average | SD     |       |
| AJ010949                | Cacna2d3 | M     | calcium channel, alpha2/delta subunit 3                    | Ca channel regulatory subunit                         | 0.56          | 0.67    | 1.20    | 696.07                                           | 100.17  | 579.00 | 74.09   | 386.42 | 49.73 |
| AF011543                | Trpc4    | M     | transient receptor potential cation channel C4             | signal transduction                                   | 1.33          | 1.48    | 1.11    | 70.01                                            | 6.95    | 62.97  | 2.68    | 93.16  | 18.01 |
| AJ225123                | Hcn1     | M     | hyperpolarization-activated, cyclic nucleotide-gated K+ 1  | ion channel                                           | 0.55          | 0.76    | 1.38    | 122.64                                           | 30.32   | 88.96  | 12.19   | 67.59  | 8.70  |
| L22218                  | Kcna5    | M     | voltage-gated K channel, shaker subfamily, member 5        | ion channel subunit                                   | 1.51          | 1.24    | 0.82    | 34.16                                            | 1.08    | 41.80  | 5.35    | 51.74  | 7.93  |
| AV335854                | Kcnab1   | IC    | voltage-gated K channel, shaker subfamily, beta member 1   | ion channel subunit                                   | 0.68          | 0.76    | 1.12    | 251.06                                           | 45.50   | 224.75 | 42.81   | 171.78 | 11.48 |
| U65593                  | Kcnab3   | IC    | voltage-gated K channel, shaker subfamily, beta member 3   | ion channel subunit                                   | 0.82          | 0.86    | 1.04    | 137.54                                           | 17.44   | 131.77 | 13.57   | 113.15 | 6.76  |
| M96688                  | Kcna6    | M     | voltage-gated K channel, shaker-related, subfamily, member | potassium channel                                     | 0.94          | 1.06    | 1.12    | 29.65                                            | 1.56    | 26.50  | 0.80    | 27.99  | 0.81  |
| D45022                  | Kcnj3    | M     | inward-rectifying K channel, subfamily J, member 3         | ion channel subunit                                   | 0.91          | 0.94    | 1.04    | 29.76                                            | 1.92    | 28.60  | 1.02    | 26.95  | 1.25  |
| AA986344                | Kcnj1    | M     | K inwardly-rectifying channel, subfamily J, member 1       | potassium channel                                     | 0.88          | 1.05    | 1.19    | 36.46                                            | 2.41    | 30.67  | 2.04    | 32.11  | 1.39  |
| AA967624                | Abcc8    |       | sulfonylurea receptor                                      | component of potassium ATP channel                    | 0.89          | 0.92    | 1.03    | 132.32                                           | 6.85    | 128.74 | 8.58    | 118.15 | 4.61  |
| AF109905                | Clic1    | M, IC | chloride intracellular channel 1                           | state-dependent voltage-gated chloride channel        | 2.11          | 1.36    | 0.64    | 68.85                                            | 24.23   | 106.94 | 36.55   | 145.49 | 47.94 |
| U70209                  | Pkd1     | M     | polycystic kidney disease 1 homolog                        | ion channel, signaling, cell adhesion, Ca homeostasis | 1.05          | 0.96    | 0.91    | 215.00                                           | 9.42    | 235.29 | 15.61   | 226.72 | 4.26  |

| Genbank  | Common              | Location  | Description                                                     | Function                                                     | Fold changes* |         |         | Average Signal Intensities & Standard Deviation |        |         |        |         |         |  |  |
|----------|---------------------|-----------|-----------------------------------------------------------------|--------------------------------------------------------------|---------------|---------|---------|-------------------------------------------------|--------|---------|--------|---------|---------|--|--|
|          |                     |           |                                                                 |                                                              | IML/LMN       | MLM/MMN | MMN/MMN | LMN                                             | SD     | MMN     | SD     | IML     | SD      |  |  |
| A1153693 | Zfp275              | IC, N     | Zinc finger protein 275                                         | transcription factor                                         | 1.31          | 1.16    | 0.89    | 113.41                                          | 9.86   | 127.99  | 7.41   | 149.00  | 7.14    |  |  |
| AF020313 | Apbb1p              | N         | amyloid $\beta$ (A4) precursor protein-binding protein          | signal transduction, transcription factor                    | 1.83          | 1.72    | 0.94    | 35.86                                           | 2.41   | 38.01   | 5.60   | 65.48   | 30.49   |  |  |
| L13204   | Foxj1               | N         | forkhead box J1                                                 | transcription factor                                         | 0.85          | 0.81    | 0.96    | 421.04                                          | 38.05  | 440.07  | 40.85  | 357.49  | 28.53   |  |  |
| Y15001   | Irx3                | N         | Iroquois related homeobox 3 (Drosophila)                        | transcription factor                                         | 0.46          | 0.51    | 1.09    | 170.47                                          | 73.72  | 155.92  | 41.34  | 79.01   | 12.20   |  |  |
| D13664   | Osf2-pending        | EC        | perostin                                                        | cell adhesion, transcription factor                          | 3.07          | 2.67    | 0.87    | 36.42                                           | 12.52  | 41.88   | 19.12  | 111.72  | 78.27   |  |  |
| AJ242864 | Phf1                | N         | putative homeodomain transcription factor                       | transcription regulation                                     | 0.83          | 0.84    | 1.01    | 334.29                                          | 40.82  | 329.95  | 34.56  | 277.28  | 19.99   |  |  |
| AA863928 | Baz1b               | N         | bromodomain adjacent to zinc finger domain, 1B                  | transcription regulation                                     | 1.23          | 1.08    | 0.87    | 858.10                                          | 32.52  | 983.51  | 58.88  | 1059.08 | 87.84   |  |  |
| AW047343 | Dbp                 | N         | D site albumin promoter binding protein                         | transcription regulator, circadian rhythm                    | 1.42          | 1.08    | 0.76    | 113.29                                          | 8.67   | 149.64  | 18.73  | 161.23  | 16.84   |  |  |
| AF079765 | Epc1                | N         | enhancer of polycomb homolog 1 (Drosophila)                     | transcription factor                                         | 1.28          | 1.08    | 0.85    | 438.32                                          | 37.68  | 518.54  | 64.23  | 559.03  | 45.15   |  |  |
| AV251191 | Foxc2               | N         | forkhead box C2                                                 | transcription factor                                         | 1.56          | 1.02    | 0.65    | 82.74                                           | 13.21  | 126.63  | 31.06  | 129.28  | 19.34   |  |  |
| U43715   | Hand2               | N         | heart and neural crest derivatives expressed transcript 2       | transcription factor                                         | 0.92          | 1.05    | 1.14    | 44.20                                           | 1.91   | 38.68   | 1.42   | 40.50   | 2.14    |  |  |
| Z11886   | Notch1              | M         | Notch gene homolog 1 (Drosophila)                               | transcription factor, signal transduction                    | 1.47          | 1.10    | 0.75    | 253.47                                          | 22.58  | 338.22  | 51.77  | 372.38  | 44.20   |  |  |
| AV220470 | Tbx2                | N         | T-box 2                                                         | transcription factor                                         | 0.76          | 0.99    | 1.30    | 47.91                                           | 3.96   | 36.90   | 2.13   | 36.59   | 1.78    |  |  |
| AF059735 | Ctbp2               | N         | C-terminal binding protein 2                                    | transcriptional regulation                                   | 0.86          | 0.71    | 0.83    | 192.13                                          | 22.86  | 231.96  | 19.57  | 165.07  | 8.79    |  |  |
| AB012276 | Atf5                | N         | activating transcription factor 5                               | regulates transcription                                      | 1.34          | 1.16    | 0.87    | 87.24                                           | 5.63   | 100.61  | 6.82   | 116.95  | 17.50   |  |  |
| AW124113 | Basp1               | N, M      | brain abundant, membrane attached signal protein 1              | transcriptional regulation, signal transduction              | 1.62          | 1.33    | 0.83    | 1271.05                                         | 333.61 | 1539.62 | 568.63 | 2053.11 | 430.89  |  |  |
| U41465   | Bcl6                | N         | B-cell leukemia/lymphoma 6                                      | transcription factor                                         | 0.35          | 0.47    | 1.32    | 603.42                                          | 281.81 | 458.51  | 278.94 | 213.26  | 44.20   |  |  |
| U76371   | Bop                 | IC, N     | CD8beta opposite strand                                         | transcription factor                                         | 0.88          | 0.92    | 1.04    | 89.73                                           | 5.97   | 85.99   | 5.75   | 79.25   | 3.79    |  |  |
| A847631  | Carhsp1             | N         | calcium regulated heat stable protein 1                         | transcriptional regulation                                   | 1.23          | 1.16    | 0.94    | 280.00                                          | 19.50  | 297.50  | 39.96  | 345.19  | 34.20   |  |  |
| L03279   | Cbfb                | N         | core binding factor beta                                        | transcriptional regulator                                    | 1.71          | 1.43    | 0.84    | 2358.21                                         | 357.11 | 2819.27 | 318.59 | 4042.24 | 1467.87 |  |  |
| A838398  | Cic                 | N         | capicua homolog (Drosophila)                                    | transcription factor                                         | 0.88          | 0.96    | 1.10    | 290.90                                          | 16.99  | 265.01  | 16.30  | 255.27  | 17.59   |  |  |
| AF084524 | Creg                | N, IC     | cellular repressor of E1A-stimulated genes                      | transcription factor                                         | 0.80          | 0.90    | 1.13    | 235.88                                          | 27.29  | 208.22  | 11.92  | 188.25  | 14.07   |  |  |
| D14485   | Csda                | N         | cold shock domain protein A                                     | transcription factor                                         | 1.32          | 1.20    | 0.91    | 372.38                                          | 24.24  | 408.63  | 43.51  | 489.88  | 106.34  |  |  |
| AJ242625 | Dmp1; PP            | IC, N, EC | dentin matrix protein                                           | transcription factor & mineralization of ECM                 | 0.45          | 0.70    | 1.55    | 93.62                                           | 50.90  | 60.31   | 18.44  | 41.95   | 13.17   |  |  |
| L12147   | Ebf1                | N         | early B-cell factor 1                                           | transcription factor                                         | 1.19          | 1.11    | 0.94    | 43.10                                           | 2.27   | 46.05   | 2.59   | 51.15   | 4.32    |  |  |
| U19617   | Elf1                | N         | E74-like factor 1                                               | transcription regulator                                      | 1.21          | 1.09    | 0.90    | 17.40                                           | 0.66   | 19.29   | 1.75   | 21.08   | 2.94    |  |  |
| AF049702 | Elf5                | N         | E74-like factor 5                                               | transcription regulator                                      | 0.77          | 0.87    | 1.13    | 29.70                                           | 4.02   | 26.39   | 2.05   | 22.98   | 2.21    |  |  |
| J04103   | Ets2                | IC, N     | E26 avian leukemia oncogene 2, 3' domain                        | transcription factor                                         | 1.20          | 1.07    | 0.89    | 161.31                                          | 7.80   | 180.71  | 11.22  | 193.04  | 19.32   |  |  |
| AF045017 | Foxc1               | N         | forkhead box C1                                                 | transcription factor                                         | 1.13          | 1.02    | 0.90    | 9.90                                            | 0.38   | 10.95   | 0.66   | 11.21   | 0.87    |  |  |
| L38607   | Foxd1               | N         | forkhead box D1                                                 | transcription factor                                         | 1.34          | 1.07    | 0.80    | 66.34                                           | 6.74   | 83.15   | 16.54  | 88.92   | 13.09   |  |  |
| AB017132 | Hhex; Hex; Pth      | N         | Hex (Pth)                                                       | transcription factor                                         | 1.19          | 1.07    | 0.90    | 67.68                                           | 7.30   | 75.22   | 3.69   | 80.21   | 8.56    |  |  |
| AW123564 | Hop-pending         | N         | homeodomain only protein                                        | transcription factor                                         | 1.50          | 1.34    | 0.89    | 884.78                                          | 192.19 | 990.42  | 131.04 | 1325.30 | 304.42  |  |  |
| AV279579 | Hoxa4               | N         | homeo box A4                                                    | transcription factor                                         | 0.85          | 0.97    | 1.14    | 16.82                                           | 1.22   | 14.77   | 1.43   | 14.32   | 1.16    |  |  |
| M31885   | Idb1                | N         | inhibitor of DNA binding 1                                      | transcription factor                                         | 1.40          | 1.15    | 0.82    | 78.98                                           | 13.21  | 96.44   | 25.27  | 110.89  | 17.35   |  |  |
| M60523   | Idb3                | N         | inhibitor of DNA binding 3                                      | transcription factor                                         | 1.69          | 1.26    | 0.75    | 138.36                                          | 19.13  | 165.35  | 67.19  | 233.91  | 65.17   |  |  |
| A852632  | Lilaf               | N         | LPS-induced TNF-alpha factor                                    | transcription factor                                         | 1.51          | 1.20    | 0.79    | 198.95                                          | 44.97  | 250.93  | 45.32  | 299.96  | 35.46   |  |  |
| U33629   | Meis1               | N         | myeloid ecotropic viral integration site 1                      | transcription factor                                         | 1.39          | 1.14    | 0.82    | 61.15                                           | 6.84   | 74.67   | 17.02  | 85.16   | 7.70    |  |  |
| Z16406   | Meox2               | N         | mesenchyme homeobox 2                                           | transcription factor                                         | 1.90          | 1.38    | 0.73    | 11.14                                           | 0.97   | 15.35   | 6.16   | 21.17   | 5.93    |  |  |
| AV316101 | Mizf-pending        | N         | MBD2-interacting zinc finger protein                            | DNA methylation and transcription repression                 | 0.85          | 0.87    | 1.03    | 136.99                                          | 18.29  | 133.08  | 7.10   | 116.05  | 8.77    |  |  |
| AF010135 | Mllt10              | N         | MLT 10 homolog                                                  | regulation of transcription                                  | 0.91          | 0.97    | 1.06    | 95.10                                           | 2.37   | 89.41   | 6.68   | 86.33   | 2.92    |  |  |
| AB015858 | Mycbp               | N         | c-myc binding protein                                           | transcriptional regulator                                    | 0.86          | 0.87    | 1.01    | 25.02                                           | 1.08   | 24.75   | 3.20   | 21.46   | 1.45    |  |  |
| X56182   | Myf5                | N         | myogenic factor 5                                               | transcription factor                                         | 1.11          | 1.07    | 0.96    | 11.32                                           | 0.25   | 11.81   | 0.98   | 12.60   | 0.70    |  |  |
| U64828   | Ncoa1               | N         | nuclear receptor coactivator 1                                  | transcriptional regulator                                    | 0.87          | 0.93    | 1.06    | 209.87                                          | 16.27  | 197.80  | 13.93  | 182.99  | 15.04   |  |  |
| U35312   | Ncor1               | N         | nuclear receptor co-repressor 1                                 | transcriptional regulator                                    | 1.39          | 1.18    | 0.85    | 361.32                                          | 38.46  | 425.39  | 56.32  | 500.72  | 69.51   |  |  |
| AV367714 | Nedd8               | N         | neural precursor cell expressed, developmentally down-regulated | transcriptional regulator                                    | 0.87          | 0.92    | 1.06    | 78.41                                           | 2.91   | 73.89   | 1.56   | 68.27   | 5.44    |  |  |
| U70475   | Nfe2l2; Nrf2        | N         | CNC basic leucine zipper DNA binding protein                    | transcriptional regulator                                    | 1.86          | 1.38    | 0.74    | 237.00                                          | 64.32  | 320.45  | 118.78 | 441.39  | 118.31  |  |  |
| M12731   | Nmyc1; N-myc        | IC, N     | N-myc proto-oncogene                                            | transcription factor                                         | 1.25          | 1.11    | 0.89    | 53.35                                           | 2.50   | 60.06   | 3.99   | 66.51   | 7.82    |  |  |
| U71206   | Pitx1               | N         | paired-like homeodomain transcription factor 1                  | transcriptional regulation                                   | 0.89          | 0.96    | 1.08    | 315.22                                          | 22.48  | 290.90  | 17.31  | 279.00  | 20.28   |  |  |
| X68363   | Pou2f1              | N         | POU domain, class 2, transcription factor 1                     | transcription factor                                         | 0.88          | 0.94    | 1.06    | 96.74                                           | 6.18   | 90.85   | 6.63   | 85.45   | 4.47    |  |  |
| AW212397 | Ski                 | IC, N     | Sloan-Kettering viral oncogene homolog                          | transcriptional regulation                                   | 1.42          | 1.12    | 0.79    | 335.80                                          | 62.13  | 424.13  | 72.26  | 476.28  | 21.09   |  |  |
| A837107  | Ssbp2               | N         | single-stranded DNA binding protein 2                           | transcriptional regulation                                   | 0.63          | 0.76    | 1.21    | 1732.78                                         | 360.07 | 1430.08 | 193.50 | 1086.20 | 219.79  |  |  |
| L47650   | Stat6               | IC, N     | signal transducer and activator of transcription 6              | transcription factor                                         | 1.65          | 1.34    | 0.81    | 43.61                                           | 5.45   | 53.68   | 13.41  | 72.06   | 28.10   |  |  |
| AJ223069 | Tcf3                | IC, N     | transcription factor 3                                          | transcriptional regulation                                   | 1.21          | 1.09    | 0.91    | 180.40                                          | 7.73   | 199.21  | 32.72  | 217.45  | 11.05   |  |  |
| X72310   | Tfdp1               | IC, N     | transcription factor Dp 1                                       | transcriptional regulation                                   | 1.36          | 1.19    | 0.88    | 154.33                                          | 10.00  | 176.01  | 21.88  | 210.24  | 41.65   |  |  |
| M63649   | Twist1; Pde; M-Twit | N         | Mouse M-twist gene, complete cds.                               | transcriptional regulation                                   | 1.46          | 1.20    | 0.82    | 45.12                                           | 4.01   | 54.73   | 9.30   | 65.74   | 13.42   |  |  |
| M58566   | Zfp361              | N         | zinc finger protein 36, C3H type-like 1                         | putative transcription factor, immediate early response gene | 1.99          | 1.26    | 0.63    | 201.06                                          | 61.41  | 318.14  | 93.10  | 400.01  | 121.97  |  |  |
| L34808   | Chx10               | N         | C. elegans ceh-10 homeo domain containing homolog               | transcription factor                                         | 1.12          | 1.26    | 1.12    | 120.55                                          | 16.60  | 107.71  | 7.41   | 135.28  | 18.92   |  |  |
| U92702   | Ebf3                | N         | early B-cell factor 3                                           | transcription factor                                         | 1.13          | 1.21    | 1.07    | 100.09                                          | 6.31   | 93.41   | 11.95  | 112.62  | 11.18   |  |  |
| L00039   | Myc; Myc2; Nird     | N         | c-myc (Myc) gene                                                | transcriptional regulation                                   | 1.14          | 1.17    | 1.02    | 13.03                                           | 1.05   | 12.73   | 0.41   | 14.87   | 1.68    |  |  |
| X76653   | Nr2f2               | N         | nuclear receptor subfamily 2, group F, member 2                 | steroid hormone receptor, transcription factor               | 1.19          | 1.53    | 1.28    | 103.50                                          | 22.96  | 80.56   | 24.78  | 123.20  | 14.37   |  |  |
| AB026583 | Rbms2               | IC        | RNA binding motif, single stranded interacting protein 2        | transcriptional and/or translational regulator               | 0.86          | 0.82    | 0.95    | 137.54                                          | 13.72  | 144.50  | 16.15  | 118.62  | 10.23   |  |  |
| U66918   | Shox2               | N         | short stature homeobox 2                                        | transcription factor                                         | 1.20          | 1.26    | 1.05    | 65.47                                           | 6.34   | 62.58   | 5.06   | 78.82   | 14.29   |  |  |
| U79550   | Sna12               | N         | snail homolog 2 (Drosophila)                                    | transcription factor                                         | 1.20          | 1.24    | 1.03    | 231.19                                          | 20.76  | 224.08  | 13.26  | 277.30  | 48.40   |  |  |
| U31566   | Nkx2-2              | N         | NK2 transcription factor related, locus 2 (Drosophila)          | transcription factor                                         | 1.22          | 0.91    | 0.75    | 70.70                                           | 7.12   | 94.88   | 10.08  | 86.54   | 19.07   |  |  |
| AV320880 | Nr5a1               | N         | nuclear receptor subfamily 5, group A, member 1                 | transcription regulation                                     | 0.88          | 1.06    | 1.21    | 40.69                                           | 2.10   | 33.67   | 3.01   | 35.78   | 4.09    |  |  |
| D49473   | Sox17               | N         | SRY-box containing gene 17                                      | transcription factor                                         | 1.00          | 0.87    | 0.87    | 127.39                                          | 11.84  | 146.65  | 12.10  | 127.49  | 9.50    |  |  |

(l) signal transduction

| Genbank  | Common                   | location | Description                                            | Function                                        | Fold changes* |        |         | Average Signal Intensities & Standard Deviations |        |          |        |          |        |
|----------|--------------------------|----------|--------------------------------------------------------|-------------------------------------------------|---------------|--------|---------|--------------------------------------------------|--------|----------|--------|----------|--------|
|          |                          |          |                                                        |                                                 | IML/LMN       | ML/MMN | MMN/MMN | LMN                                              | SD     | MMN      | SD     | IML      | SD     |
| U12919   | Adcy7                    | M        | adenylate cyclase 7                                    | signal transduction                             | 1.72          | 1.76   | 1.02    | 161.23                                           | 28.96  | 158.30   | 42.21  | 278.05   | 43.15  |
| AB010149 | Adcyap1; PACAP           | EC       | PACAP ligand precursor                                 | neuropeptide hormone                            | 3.60          | 3.08   | 0.86    | 211.08                                           | 190.76 | 246.59   | 102.66 | 760.66   | 389.44 |
| AF020313 | Apbb1ip                  |          | amyloid beta (A4) precursor protein-binding protein    | signal transduction, transcription factor       | 1.83          | 1.72   | 0.94    | 35.86                                            | 2.41   | 38.01    | 5.60   | 65.48    | 30.49  |
| AW215551 | Arhgap9                  |          | Rho GTPase activating protein 9                        | signal transduction                             | 0.76          | 0.80   | 1.05    | 135.86                                           | 10.01  | 129.76   | 8.71   | 103.82   | 12.96  |
| A1844631 | Baiap2                   |          | angiogenesis inhibitor 1-associated protein 2          | Rho protein signal transduction                 | 1.37          | 1.33   | 0.97    | 61.88                                            | 5.03   | 63.99    | 7.07   | 85.03    | 17.62  |
| U49513   | Ccl9                     | EC       | chemokine (C-C motif) ligand 9                         | signal transduction                             | 1.39          | 1.28   | 0.92    | 57.47                                            | 3.38   | 62.55    | 6.38   | 79.82    | 7.79   |
| U56819   | Ccr2                     | M        | chemokine (C-C) receptor 2                             | signal transduction                             | 1.27          | 1.30   | 1.02    | 31.32                                            | 2.43   | 30.68    | 3.55   | 39.86    | 5.74   |
| AV370035 | Ccr5                     | M        | chemokine (C-C motif) receptor 5                       | signal transduction                             | 1.51          | 1.70   | 1.13    | 39.85                                            | 13.13  | 35.28    | 3.48   | 59.98    | 16.88  |
| X06368   | Csf1r                    | M        | colony stimulating factor 1 receptor                   | signal transduction                             | 1.48          | 1.34   | 0.90    | 169.83                                           | 18.30  | 188.50   | 30.00  | 251.72   | 51.16  |
| AW123850 | F2r                      | M        | thrombin receptor                                      | signal transduction                             | 2.03          | 1.78   | 0.88    | 662.17                                           | 193.49 | 752.40   | 146.20 | 1341.07  | 321.28 |
| X59398   | Flt3                     | M        | FMS-like tyrosine kinase 3                             | signal transduction                             | 0.63          | 0.70   | 1.11    | 1044.99                                          | 108.49 | 938.68   | 143.52 | 659.30   | 106.42 |
| AA960459 | Frbp2, srGap3            | IC       | formin binding protein 2                               | signal transduction                             | 0.75          | 0.81   | 1.07    | 118.65                                           | 8.63   | 110.45   | 8.56   | 89.54    | 7.82   |
| U10551   | Gem                      | IC       | monomeric G protein                                    | signal transduction                             | 0.50          | 0.63   | 1.27    | 132.42                                           | 25.84  | 104.14   | 37.26  | 65.88    | 9.75   |
| AW125649 | Gna12                    | M        | trimeric G protein, alpha 12 subunit                   | signal transduction                             | 1.36          | 1.22   | 0.90    | 202.96                                           | 25.01  | 225.97   | 29.21  | 276.67   | 29.72  |
| X83577   | Gp4                      | M, EC    | glypican 4                                             | signal transduction, ECM interactions           | 1.42          | 1.26   | 0.89    | 80.82                                            | 8.85   | 90.78    | 12.18  | 114.65   | 11.73  |
| AF023482 | Hs1bp1                   | mit, ER  | HS1 binding protein                                    | signal transduction                             | 0.76          | 0.77   | 1.02    | 587.91                                           | 69.12  | 578.68   | 56.57  | 448.09   | 99.03  |
| Y16518   | Lanc1                    | M        | LanC-like protein 1, GPCR 69                           | GPCR, signal transduction                       | 0.71          | 0.78   | 1.09    | 1623.74                                          | 156.32 | 1486.32  | 216.49 | 1160.92  | 141.39 |
| AW259500 | Map3k7ip2                | IC       | MAPKKK 7 interacting protein 2                         | signal transduction                             | 1.53          | 1.43   | 0.94    | 496.70                                           | 61.13  | 530.47   | 109.53 | 757.49   | 134.23 |
| Y13439   | Mapk12                   | IC       | mitogen-activated protein kinase 12                    | signal transduction                             | 0.84          | 0.82   | 0.97    | 377.30                                           | 14.36  | 389.23   | 31.90  | 317.83   | 44.60  |
| A1846534 | Nek6                     |          | NIMA-related expressed kinase 6                        | signal transduction                             | 0.87          | 0.85   | 0.99    | 185.95                                           | 11.00  | 188.72   | 16.35  | 161.16   | 16.78  |
| M17298   | Ngfb                     | EC       | nerve growth factor, beta                              | growth & maintenance, signal transduction       | 0.87          | 0.89   | 1.01    | 32.01                                            | 2.59   | 31.56    | 2.19   | 27.93    | 1.44   |
| AV372577 | Npy2r                    | M        | neuropeptide Y receptor Y2                             | neuropeptide signal transduction                | 1.91          | 1.89   | 0.99    | 234.17                                           | 27.65  | 235.89   | 14.57  | 446.90   | 174.57 |
| M55181   | Penk1                    | EC       | preproenkephalin 1                                     | neuropeptide signal transduction                | 1.74          | 1.51   | 0.87    | 139.27                                           | 14.63  | 159.78   | 8.72   | 241.80   | 60.47  |
| M68915   | Pgr                      | IC, N    | progesterone receptor                                  | steroid hormone signal transduction             | 0.90          | 0.89   | 0.99    | 22.09                                            | 0.63   | 22.35    | 0.70   | 19.97    | 0.99   |
| AV378129 | Ppfbp2                   | IC       | tyrosine phosphatase receptor F interacting protein    | signal transduction                             | 1.15          | 1.09   | 0.95    | 11.30                                            | 0.41   | 11.88    | 0.49   | 12.98    | 0.72   |
| AB007696 | Ptger2                   | M        | prostaglandin E receptor 2                             | eicosanoid hormone signal transduction          | 1.10          | 1.13   | 1.03    | 19.48                                            | 0.83   | 18.99    | 1.04   | 21.49    | 0.76   |
| D10204   | Ptger3                   | M        | prostaglandin E receptor 3                             | eicosanoid hormone signal transduction          | 1.18          | 1.16   | 0.98    | 10.49                                            | 0.56   | 10.68    | 0.72   | 12.40    | 1.16   |
| U37465   | Ptpro                    | M        | protein tyrosine phosphatase, receptor type, O         | signal transduction                             | 1.36          | 1.24   | 0.91    | 176.83                                           | 12.45  | 194.75   | 24.45  | 240.63   | 28.83  |
| A1835968 | Rln2                     | IC       | Ras and Rab interactor 2                               | secretion, vesicular transport, signaling       | 1.82          | 1.39   | 0.76    | 317.55                                           | 40.33  | 416.24   | 120.04 | 578.20   | 85.36  |
| AF008914 | Sstr2                    | M        | somatostatin receptor 2                                | signal transduction                             | 1.71          | 1.60   | 0.94    | 53.62                                            | 2.70   | 57.30    | 4.95   | 91.86    | 23.09  |
| D86639   | Stac                     | IC       | SH3 and cysteine rich domain                           | intracellular signaling cascade                 | 1.70          | 1.65   | 0.97    | 63.86                                            | 10.99  | 65.71    | 5.62   | 108.63   | 51.73  |
| D17584   | Tac1                     | EC       | tachykinin 1                                           | neuropeptide signal transduction                | 6.31          | 5.41   | 0.86    | 67.04                                            | 29.24  | 78.17    | 72.89  | 422.82   | 503.80 |
| X77952   | Eng                      | M        | endoglin                                               | constituent of TGF-beta signaling complex       | 1.56          | 1.07   | 0.69    | 543.31                                           | 88.88  | 789.78   | 112.17 | 847.13   | 184.77 |
| AF079366 | Mpp3                     | M        | MAGUK p55 subfamily member 3                           | signal transduction                             | 1.36          | 1.05   | 0.78    | 186.29                                           | 27.51  | 239.94   | 31.87  | 252.47   | 32.42  |
| AF073997 | Mtmr1                    | IC, M    | myotubularin related protein 1                         | phosphatase, signal transduction                | 0.83          | 0.94   | 1.14    | 108.30                                           | 7.23   | 94.97    | 6.37   | 89.68    | 6.11   |
| Z11886   | Notch1                   | M        | Notch gene homolog 1 (Drosophila)                      | transcription factor, signal transduction       | 1.47          | 1.10   | 0.75    | 253.47                                           | 22.58  | 338.22   | 51.77  | 372.38   | 44.20  |
| ZV149007 | Pdlim1                   | IC       | PDZ and LIM domain 1 (elfin)                           | adapter, signal transduction                    | 0.85          | 0.96   | 1.14    | 454.49                                           | 32.25  | 399.01   | 35.08  | 384.86   | 23.35  |
| U37199   | Rgnef                    |          | Rho-guanine nucleotide exchange factor                 | signal transduction                             | 1.24          | 1.03   | 0.83    | 170.92                                           | 17.36  | 205.65   | 21.28  | 211.56   | 16.08  |
| D38410   | Tff3                     | EC       | trefoil factor 3, intestinal                           | peptide signal transduction                     | 0.91          | 1.00   | 1.09    | 295.52                                           | 15.01  | 270.28   | 11.28  | 269.31   | 7.76   |
| D28186   | Srms                     |          | src-related kinase                                     | signal transduction                             | 1.00          | 1.05   | 1.05    | 34.10                                            | 0.68   | 32.35    | 0.73   | 34.06    | 0.74   |
| AF011420 | V2r10                    | M        | vomeronasal 2, receptor, 10                            | signal transduction                             | 0.96          | 1.11   | 1.16    | 124.12                                           | 2.60   | 107.44   | 7.69   | 119.32   | 4.76   |
| AA036065 | Adcy2                    | M        | adenylate cyclase 2                                    | signal transduction                             | 1.25          | 1.17   | 0.94    | 1090.99                                          | 78.54  | 1165.27  | 194.09 | 1364.39  | 183.56 |
| M93422   | Adcy6                    | M        | adenylate cyclase 6                                    | signal transduction                             | 1.19          | 1.03   | 0.87    | 215.72                                           | 18.21  | 249.33   | 32.09  | 256.74   | 24.24  |
| Z50190   | Adcy9                    | M        | adenylate cyclase 9                                    | signal transduction                             | 0.73          | 0.84   | 1.16    | 132.05                                           | 15.86  | 114.05   | 16.92  | 95.88    | 9.24   |
| AV355809 | Admr                     | M        | adrenomedullin receptor                                | neuropeptide signal transduction                | 1.31          | 0.99   | 0.75    | 21.52                                            | 2.02   | 28.67    | 6.36   | 28.24    | 2.72   |
| AF045887 | Agt; Aogen               | EC       | angiotensinogen                                        | local & circulating hormone                     | 1.65          | 1.16   | 0.70    | 346.27                                           | 56.61  | 495.47   | 100.82 | 572.68   | 210.40 |
| M13071   | Araf; A-Raf              | IC, mit  | A-raf peptide                                          | signal transduction                             | 1.22          | 1.09   | 0.90    | 134.29                                           | 15.40  | 149.88   | 21.63  | 163.63   | 10.85  |
| X63535   | Axl                      | M        | AXL receptor tyrosine kinase                           | signal transduction                             | 1.17          | 1.09   | 0.93    | 96.14                                            | 4.43   | 103.32   | 10.37  | 112.89   | 10.22  |
| AW124113 | Basp1                    | N, M     | brain abundant, membrane attached signal protein 1     | transcriptional regulation, signal transduction | 1.62          | 1.33   | 0.83    | 1271.05                                          | 333.61 | 1539.62  | 568.63 | 2053.11  | 430.89 |
| A1847646 | Calml4                   | IC       | calmodulin-like 4                                      | signal transduction                             | 1.47          | 1.04   | 0.71    | 114.20                                           | 6.77   | 161.47   | 52.54  | 168.14   | 27.98  |
| M58004   | Ccl6                     | EC       | chemokine (C-C motif) ligand 6                         | signal transduction                             | 1.31          | 1.21   | 0.92    | 89.51                                            | 15.07  | 96.99    | 8.03   | 117.22   | 23.28  |
| A1844806 | Cdc42ep4                 | IC, CySk | CDC42 effector protein (Rho GTPase binding) 4          | signal transduction                             | 1.36          | 1.20   | 0.88    | 209.62                                           | 17.05  | 238.17   | 53.92  | 286.05   | 36.02  |
| M55219   | Csprs                    | N        | component of Sp100-rs                                  | signal transduction                             | 0.85          | 0.98   | 1.15    | 21.85                                            | 2.26   | 19.04    | 1.82   | 18.59    | 1.15   |
| L12029   | Cxcl12                   | EC       | chemokine (C-X-C motif) ligand 12                      | signal transduction; growth factor              | 2.58          | 1.68   | 0.65    | 57.12                                            | 14.39  | 87.88    | 27.86  | 147.51   | 80.49  |
| AF016697 | Dfy; FY;                 | M        | chemokine receptor                                     | signal transduction                             | 0.76          | 0.83   | 1.10    | 311.46                                           | 39.97  | 284.31   | 45.12  | 236.08   | 41.09  |
| U13370   | Edg2                     | M        | lysophosphatidic acid G-protein-coupled receptor, 2    | signal transduction                             | 1.70          | 1.27   | 0.74    | 490.22                                           | 138.96 | 660.17   | 148.71 | 835.69   | 90.86  |
| J02700   | Enpp1                    | M        | ectonucleotide pyrophosphatase/phosphodiesterase 1     | nucleotide mediated signal transduction         | 1.31          | 1.09   | 0.83    | 66.36                                            | 2.72   | 79.84    | 6.50   | 86.64    | 15.15  |
| AV378405 | Entpd2                   | M        | ectonucleoside triphosphate diphosphohydrolase 2       | nucleotide mediated signal transduction         | 1.26          | 1.09   | 0.87    | 80.51                                            | 8.67   | 92.98    | 7.11   | 101.44   | 11.71  |
| M31312   | Fcgr2b; CD32; Fc-gamma-2 | M        | beta Fc receptor type II precursor;                    | signal transduction                             | 1.27          | 1.16   | 0.91    | 32.83                                            | 2.39   | 36.01    | 5.04   | 41.76    | 6.20   |
| L17022   | Fcgrt                    | M        | Fc receptor, IgG, alpha chain transporter              | signal transduction                             | 1.20          | 1.07   | 0.89    | 10.96                                            | 0.84   | 12.33    | 1.83   | 13.19    | 0.67   |
| M30641   | Fgf1                     | EC       | fibroblast growth factor 1                             | signal transduction, cell growth                | 0.53          | 0.71   | 1.33    | 237.45                                           | 93.48  | 178.88   | 50.23  | 126.74   | 27.89  |
| AW125390 | Fgls; Ifitm3             |          | fragilis, interferon induced transmembrane protein 3   | signal transduction                             | 1.51          | 1.07   | 0.71    | 193.79                                           | 38.72  | 273.36   | 92.21  | 293.14   | 54.86  |
| A1841629 | Gnai2                    | M        | guanine nucleotide binding protein, alpha inhibiting 2 | signal transduction                             | 1.48          | 1.27   | 0.85    | 725.97                                           | 39.22  | 851.18   | 229.70 | 1077.61  | 205.94 |
| AF107848 | Gnas                     | M        | guanine nucleotide binding protein, alpha stimulating  | signal transduction                             | 1.15          | 1.04   | 0.91    | 9826.37                                          | 835.40 | 10823.99 | 877.25 | 11264.78 | 662.57 |
| A1843937 | Gng5                     | M        | guanine nucleotide binding protein gamma 5 subunit     | signal transduction                             | 1.57          | 1.26   | 0.80    | 819.29                                           | 116.14 | 1018.43  | 150.28 | 1286.56  | 263.33 |
| AF110818 | Gpr49                    | M        | G protein-coupled receptor 49                          | signal transduction                             | 0.82          | 0.90   | 1.09    | 40.10                                            | 4.14   | 36.68    | 3.66   | 32.85    | 2.19   |
| Y15798   | Gprk6                    |          | G protein-coupled receptor kinase 6                    | signal transduction                             | 1.32          | 1.18   | 0.90    | 278.81                                           | 28.69  | 311.47   | 36.16  | 367.82   | 49.89  |
| M94450   | Grb7                     | IC       | growth factor receptor bound protein 7                 | signal transduction                             | 0.87          | 0.96   | 1.10    | 336.12                                           | 26.21  | 305.31   | 20.53  | 293.12   | 12.56  |
| D16195   | Gm; epithelin            | EC,      | granulin                                               | growth factor, signal transduction              | 1.50          | 1.25   | 0.83    | 161.43                                           | 22.26  | 193.33   | 42.72  | 241.51   | 22.04  |
| M68902   | Hcpb                     | IC       | hemopoietic cell phosphatase                           | signal transduction                             | 1.15          | 1.12   | 0.97    | 25.06                                            | 2.06   | 25.75    | 1.95   | 28.83    | 2.62   |
| X67644   | Ier3                     | M        | immediate early response 3                             | stress signal transduction                      | 0.77          | 0.88   | 1.14    | 232.18                                           | 23.21  | 203.28   | 23.86  | 179.28   | 22.57  |
| Y09864   | Ilnar2                   | M        | interferon (alpha and beta) receptor 2                 | signal transduction                             | 1.20          | 1.12   | 0.93    | 58.65                                            | 4.06   | 63.08    | 7.55   | 70.55    | 4.98   |



(l) signal transduction

| Genbank  | Common             | location | Description                                                                                               | Function                                               | Fold changes* |         |        | Average Signal Intensities & Standard Deviations |        |         |        |         |        |
|----------|--------------------|----------|-----------------------------------------------------------------------------------------------------------|--------------------------------------------------------|---------------|---------|--------|--------------------------------------------------|--------|---------|--------|---------|--------|
|          |                    |          |                                                                                                           |                                                        | IML/LMN       | MLN/MMN | MMN/MN | LMN                                              |        | MMN     |        | IML     |        |
|          |                    |          |                                                                                                           |                                                        |               |         |        | Average                                          | SD     | Average | SD     | Average | SD     |
| X71922   | Igf2; Mpr; M6pr    | EC       | insulin-like growth factor 2                                                                              | growth factor, signal transduction                     | 2.87          | 1.50    | 0.52   | 2416.06                                          | #####  | 4632.00 | #####  | 6937.16 | #####  |
| A1838737 | Igfbp4             | EC       | insulin-like growth factor binding protein 4                                                              | cell growth, signal transduction                       | 1.18          | 1.07    | 0.91   | 310.28                                           | 17.62  | 341.01  | 17.12  | 364.62  | 34.79  |
| L12447   | Igfbp5             | EC       | insulin-like growth factor binding protein 5                                                              | cell growth, signal transduction                       | 4.36          | 1.48    | 0.34   | 256.86                                           | 178.61 | 757.23  | 699.65 | 1119.62 | 410.93 |
| U53696   | I110rb             | M        | interleukin 10 receptor, beta                                                                             | cell surface receptor linked signal transduction       | 1.65          | 1.34    | 0.81   | 570.21                                           | 103.84 | 703.19  | 205.97 | 938.78  | 198.67 |
| AA608387 | I113ra1            | M        | interleukin 13 receptor, alpha 1                                                                          | cell surface receptor linked signal transduction       | 1.72          | 1.25    | 0.72   | 38.06                                            | 7.45   | 52.55   | 17.22  | 65.54   | 12.06  |
| M26271   | IL2R               | M        | Mouse interleukin 2 receptor gene, 5' end.                                                                | cell surface receptor linked signal transduction       | 0.85          | 0.93    | 1.10   | 25.86                                            | 2.65   | 23.43   | 2.05   | 21.89   | 1.19   |
| X06271   | IL5; IL-5          | EC       | interleukin 5 (eosinophil differentiation factor).                                                        | cell surface receptor linked signal transduction       | 0.90          | 0.99    | 1.10   | 73.47                                            | 3.06   | 66.50   | 3.28   | 66.01   | 6.25   |
| A1837528 | Jak1               | IC       | Janus kinase 1                                                                                            | signal transduction                                    | 0.69          | 0.72    | 1.04   | 898.86                                           | 202.04 | 861.74  | 202.34 | 618.69  | 155.17 |
| L16956   | Jak2               | IC       | Janus kinase 2                                                                                            | signal transduction                                    | 1.27          | 1.17    | 0.92   | 96.37                                            | 10.34  | 104.82  | 12.37  | 122.41  | 15.87  |
| AF022889 | Ltbp1              | EC       | latent transforming growth factor beta binding protein 1                                                  | TGF beta receptor signal transduction                  | 1.55          | 1.23    | 0.80   | 44.96                                            | 4.15   | 56.32   | 11.38  | 69.47   | 13.93  |
| AV317327 | Mapk1              | IC, N    | mitogen activated protein kinase 1                                                                        | signal transduction                                    | 0.83          | 0.94    | 1.13   | 38.14                                            | 2.60   | 33.85   | 2.98   | 31.65   | 3.26   |
| AB005664 | Mapk9              | IC       | mitogen activated protein kinase 9                                                                        | signal transduction                                    | 0.79          | 0.94    | 1.20   | 133.03                                           | 18.65  | 111.22  | 6.95   | 104.82  | 19.94  |
| A1957146 | Mhas1              | EC       | malignant fibrous histiocytoma amplified sequence 1                                                       | signal transduction                                    | 1.56          | 1.16    | 0.74   | 479.17                                           | 137.62 | 648.11  | 65.74  | 748.64  | 198.74 |
| X61399   | Mip                | M        | MARCKS-like protein                                                                                       | signal transduction                                    | 1.40          | 1.27    | 0.91   | 180.89                                           | 11.58  | 198.54  | 33.22  | 252.52  | 62.71  |
| A1504305 | Ms4a6b             | M        | membrane-spanning 4-domains, subfamily A, member 6l                                                       | signal transduction                                    | 1.25          | 1.14    | 0.92   | 20.91                                            | 1.45   | 22.82   | 3.16   | 26.05   | 2.23   |
| X92397   | Ndph               | EC       | Norrrie disease homolog                                                                                   | receptor for Norrin-Fz4 signal transduction            | 1.25          | 1.11    | 0.89   | 206.01                                           | 30.60  | 231.80  | 29.56  | 257.70  | 26.84  |
| AW050346 | Ngf                | M        | neuronal guanine nucleotide exchange factor                                                               | signal transduction                                    | 1.45          | 1.38    | 0.95   | 529.99                                           | 126.69 | 558.54  | 103.52 | 770.96  | 164.27 |
| AF004927 | Oprs1              | M        | opioid receptor, sigma 1                                                                                  | opioid signal transduction                             | 0.71          | 0.84    | 1.19   | 466.56                                           | 54.52  | 392.24  | 80.55  | 330.22  | 64.27  |
| U39738   | Pak3               | M        | p21 (CDKN1A)-activated kinase 3                                                                           | signal transduction                                    | 0.71          | 0.86    | 1.21   | 184.68                                           | 28.67  | 152.96  | 26.88  | 131.51  | 33.88  |
| AJ05073  | Pcdcd6ip           | IC       | programmed cell death 6 interacting protein                                                               | signal transduction                                    | 0.76          | 0.90    | 1.19   | 458.46                                           | 52.32  | 384.08  | 39.25  | 346.26  | 49.62  |
| AF042491 | Pgrmc1             | M        | progesterone receptor membrane component 1                                                                | signal transduction                                    | 1.76          | 1.47    | 0.84   | 853.39                                           | 247.25 | 1021.10 | 360.45 | 1505.12 | 283.24 |
| AW050079 | Pib5pa             | IC       | phosphatidylinositol (4,5) biphosphate 5-phosphatase, /                                                   | signal modifying enzyme                                | 0.74          | 0.81    | 1.10   | 612.18                                           | 87.18  | 556.58  | 114.84 | 452.05  | 71.63  |
| AB008791 | Plk3c2g            | M        | phosphatidylinositol 3-kinase, C2, gamma polypeptide phosphatidylinositol metabolism, signal transduction | signal transduction                                    | 0.80          | 0.84    | 1.05   | 41.03                                            | 2.69   | 38.98   | 6.00   | 32.84   | 4.05   |
| D86176   | Pip5k1a            | M        | phosphatidylinositol-4-phosphate 5-kinase, type 1 alpha                                                   | phosphatidylinositol metabolism, signal transduction   | 0.61          | 0.77    | 1.27   | 266.85                                           | 50.29  | 210.63  | 33.76  | 162.54  | 27.91  |
| D30779   | Pla2g1br           | M        | phospholipase A2, group IB, pancreas, receptor                                                            | lipid metabolism, signal transduction                  | 1.26          | 1.18    | 0.94   | 17.44                                            | 1.42   | 18.62   | 1.61   | 21.96   | 2.65   |
| U85713   | Plcb1              | IC       | phospholipase C, beta 1                                                                                   | signal transduction                                    | 0.91          | 0.96    | 1.06   | 43.44                                            | 3.51   | 40.94   | 1.73   | 39.34   | 0.94   |
| AB023027 | Pnck               | M        | pregnancy upregulated non-ubiquitously expressed CaM kii                                                  | signal transduction                                    | 1.69          | 1.40    | 0.83   | 124.34                                           | 33.77  | 149.82  | 33.72  | 210.24  | 67.05  |
| D84376   | Ppap2a             | M        | phosphatidic acid phosphatase 2a                                                                          | lipid metabolism, signal transduction                  | 0.69          | 0.82    | 1.18   | 682.51                                           | 97.39  | 576.10  | 47.40  | 469.90  | 95.01  |
| AW124336 | Ppp6c              | M        | protein phosphatase 6, catalytic subunit                                                                  | signal transduction                                    | 0.80          | 0.86    | 1.08   | 379.19                                           | 43.83  | 352.31  | 36.75  | 301.69  | 31.27  |
| D38366   | Ptpn13             | IC, CySk | protein tyrosine phosphatase, non-receptor type 13                                                        | signal transduction                                    | 1.61          | 1.33    | 0.82   | 98.83                                            | 11.04  | 119.84  | 33.50  | 159.26  | 33.21  |
| D31898   | Ptprr              | M        | protein tyrosine phosphatase, receptor type, R                                                            | signal transduction                                    | 1.27          | 1.22    | 0.96   | 557.34                                           | 36.01  | 582.06  | 58.12  | 708.69  | 121.77 |
| U36488   | Ptprv              | M        | protein tyrosine phosphatase, receptor type                                                               | signal transduction                                    | 0.88          | 0.96    | 1.09   | 25.71                                            | 0.86   | 23.59   | 2.22   | 22.75   | 1.50   |
| AA798971 | Rab3ip             | IC       | RAB3A interacting protein                                                                                 | signal transduction                                    | 0.80          | 0.84    | 1.05   | 192.84                                           | 26.07  | 183.47  | 23.19  | 153.95  | 10.31  |
| AW047017 | Rab14              | IC       | RAB14, member RAS oncogene family                                                                         | G protein, signal transduction                         | 0.83          | 0.96    | 1.16   | 58.79                                            | 5.70   | 50.76   | 4.28   | 48.91   | 5.88   |
| A1835712 | Rab34              | G        | RAB34, member of RAS oncogene family                                                                      | G protein, signal transduction                         | 1.25          | 1.11    | 0.89   | 218.61                                           | 17.28  | 246.92  | 42.43  | 273.95  | 24.97  |
| AW124597 | Rap1gds1           | M        | RAP1, GTP-GDP dissociation stimulator 1                                                                   | signal transduction                                    | 0.70          | 0.81    | 1.17   | 3970.40                                          | 879.55 | 3407.16 | 513.19 | 2759.54 | 544.29 |
| AW049415 | Rassf1             | M        | Ras association (RalGDS/AF-6) domain family 1                                                             | signal transduction                                    | 1.20          | 1.07    | 0.89   | 115.89                                           | 13.35  | 129.66  | 11.36  | 138.56  | 9.15   |
| AV335997 | Rgs10              | M        | regulator of G-protein signalling 10                                                                      | signal transduction                                    | 1.75          | 1.44    | 0.82   | 170.75                                           | 29.88  | 207.46  | 13.95  | 298.41  | 124.39 |
| AF061934 | Rgs11              | M        | regulator of G-protein signaling 11                                                                       | signal transduction                                    | 0.70          | 0.80    | 1.14   | 547.07                                           | 82.82  | 478.12  | 83.75  | 380.49  | 57.03  |
| M21019   | Rras               | IC       | Harvey rat sarcoma oncogene, subgroup R                                                                   | G protein signal transduction                          | 1.36          | 1.20    | 0.88   | 95.31                                            | 9.72   | 107.99  | 19.00  | 129.63  | 29.68  |
| L21707   | Ryk                | M        | receptor-like tyrosine kinase                                                                             | signal transduction                                    | 1.18          | 1.03    | 0.87   | 306.41                                           | 25.24  | 352.65  | 18.89  | 362.46  | 46.83  |
| U15635   | Samhd1             | IC       | SAM domain and HD domain, 1                                                                               | signal transduction                                    | 1.19          | 1.11    | 0.93   | 96.48                                            | 4.18   | 104.10  | 11.03  | 115.15  | 11.58  |
| AA822531 | Stk2               | IC, N    | serine/threonine kinase 2                                                                                 | signal transduction                                    | 1.23          | 1.16    | 0.94   | 556.75                                           | 81.51  | 590.14  | 73.51  | 687.10  | 51.53  |
| AF039601 | Tgfb3              | M        | transforming growth factor, beta receptor III                                                             | signal transduction                                    | 0.81          | 0.84    | 1.04   | 135.54                                           | 11.61  | 130.17  | 16.02  | 109.79  | 9.57   |
| X87128   | Tnfrsf1b; p75      | M        | M.musculus p75 TNF receptor DNA.                                                                          | signal transduction                                    | 1.31          | 1.19    | 0.91   | 72.35                                            | 3.31   | 79.84   | 13.56  | 94.75   | 15.63  |
| AW060819 | Twg-pending        | EC       | twisted gastrulation protein                                                                              | signal transduction                                    | 1.76          | 1.32    | 0.75   | 186.04                                           | 35.20  | 247.34  | 102.36 | 326.68  | 90.52  |
| M89800   | Wnt6               | EC       | wingless-related MMTV integration site 6                                                                  | signaling peptide                                      | 1.30          | 1.06    | 0.81   | 68.05                                            | 8.36   | 83.81   | 14.10  | 88.75   | 12.29  |
| AA880988 | Xlkd1              | M        | extra cellular link domain-containing 1                                                                   | glycosaminoglycan catabolism, cell adhesion, signaling | 1.43          | 1.21    | 0.85   | 39.10                                            | 6.25   | 46.27   | 10.34  | 55.94   | 10.43  |
| X80508   | Yap                | IC       | yes-associated protein                                                                                    | TGF-beta growth factor signal transduction             | 1.65          | 1.17    | 0.71   | 251.13                                           | 59.14  | 355.55  | 130.72 | 415.59  | 62.64  |
| AF068182 | Blnk               | M        | B-cell linker                                                                                             | signal transduction                                    | 1.17          | 1.21    | 1.04   | 16.13                                            | 0.90   | 15.52   | 0.65   | 18.80   | 2.98   |
| X62502   | Ccl4; Act-2; Mip1b | EC       | chemokine (C-C motif) ligand 4                                                                            | signal transduction                                    | 1.03          | 1.08    | 1.05   | 116.68                                           | 2.92   | 111.55  | 3.04   | 120.69  | 5.58   |
| L38580   | Gal; Galn          | EC       | galanin neuropeptide                                                                                      | neuropeptide signal transduction                       | 1.21          | 1.28    | 1.06   | 214.48                                           | 10.75  | 202.41  | 6.20   | 259.99  | 52.94  |
| U53219   | Igtp               | IC       | interferon gamma induced GTPase                                                                           | G protein signal transduction                          | 1.09          | 1.16    | 1.06   | 41.62                                            | 1.62   | 39.11   | 3.85   | 45.25   | 3.69   |
| D13695   | I11f11             | M        | interleukin 1 receptor-like 1                                                                             | cell surface receptor linked signal transduction       | 1.14          | 1.24    | 1.09   | 18.46                                            | 1.25   | 16.99   | 0.80   | 21.10   | 4.27   |
| M29697   | I11r               | M        | interleukin 7 receptor                                                                                    | cell surface receptor linked signal transduction       | 1.14          | 1.20    | 1.05   | 20.22                                            | 2.09   | 19.20   | 1.31   | 22.99   | 3.12   |
| X80937   | Ralbp1             | M        | ralA binding protein 1                                                                                    | Ral G protein effector, regulates receptor endocytosis | 1.13          | 1.20    | 1.06   | 889.23                                           | 38.87  | 841.76  | 66.19  | 1008.02 | 151.95 |
| U85055   | Rgs14              | M        | regulator of G-protein signaling 14                                                                       | G protein signal transduction                          | 1.08          | 1.12    | 1.04   | 217.03                                           | 10.01  | 207.87  | 7.07   | 233.55  | 21.41  |
| X97991   | Calca              | EC       | calcitonin/calcitonin-related polypeptide, alpha                                                          | peptide signal transduction                            | 0.93          | 1.02    | 1.10   | 117.83                                           | 6.75   | 106.82  | 5.41   | 109.17  | 5.06   |
| AF022990 | Ccr5; CCR5         | M        | chemokine receptor-5 (CCR5)                                                                               | signal transduction                                    | 0.99          | 1.11    | 1.12   | 21.10                                            | 1.10   | 18.81   | 1.20   | 20.80   | 1.26   |
| X93481   | Cd8a               | M        | CD8 antigen, alpha chain                                                                                  | antigen recognition, signal transduction               | 0.95          | 1.04    | 1.09   | 26.40                                            | 1.20   | 24.23   | 1.53   | 25.15   | 0.60   |
| AV309794 | Gkap42-pending     | G        | cGMP-dependent protein kinase anchoring protein                                                           | signal transduction                                    | 0.98          | 1.13    | 1.16   | 41.88                                            | 2.93   | 36.26   | 2.52   | 40.98   | 4.17   |
| U51908   | Ntsr2              | M        | neurotensin receptor 2                                                                                    | signal transduction                                    | 1.17          | 0.99    | 0.85   | 893.37                                           | 66.75  | 1046.40 | 93.86  | 1041.15 | 107.83 |
| X60664   | Pde6a              | IC       | phosphodiesterase 6A, cGMP-specific, rod, alpha                                                           | signal transduction                                    | 0.91          | 1.05    | 1.16   | 123.31                                           | 8.70   | 106.73  | 5.29   | 112.56  | 10.46  |
| AF096285 | Strap              | M        | serine/threonine kinase receptor associated protein                                                       | signal transduction                                    | 0.74          | 1.06    | 1.43   | 386.86                                           | 76.83  | 269.90  | 73.44  | 284.77  | 30.50  |

## (J) ribosome

| Genbank  | Common       | location | Description                   | Function             | Fold changes* |        |        | Average Signal Intensities & Standard Deviations |        |         |        |         |        |
|----------|--------------|----------|-------------------------------|----------------------|---------------|--------|--------|--------------------------------------------------|--------|---------|--------|---------|--------|
|          |              |          |                               |                      | IML/LMN       | ML/MMN | MN/MMN | LMN                                              |        | MMN     |        | IML     |        |
|          |              |          |                               |                      |               |        |        | Average                                          | SD     | Average | SD     | Average | SD     |
| AV105022 | Rpl10        | IC       | ribosomal protein 10          | protein biosynthesis | 1.31          | 1.15   | 0.88   | 835.51                                           | 43.39  | 951.92  | 69.16  | 1096.31 | 83.20  |
| L08651   | Rpl29        | IC       | ribosomal protein L29         | protein biosynthesis | 1.62          | 1.45   | 0.90   | 194.34                                           | 36.69  | 216.07  | 17.41  | 313.92  | 79.27  |
| X15962   | Rps12        | IC       | ribosomal protein S12         | protein biosynthesis | 1.76          | 1.30   | 0.74   | 1439.57                                          | 215.79 | 1949.57 | 393.91 | 2530.88 | 368.21 |
| AF100956 | Rps18        | IC       | ribosomal protein subunit S18 | protein biosynthesis | 1.47          | 1.10   | 0.75   | 920.88                                           | 74.51  | 1233.85 | 270.76 | 1352.71 | 191.64 |
| AI836446 | Rrbp1        | IC       | ribosome binding protein 1    | protein biosynthesis | 1.57          | 1.21   | 0.78   | 198.44                                           | 17.01  | 255.85  | 47.83  | 310.62  | 32.27  |
| U12403   | Rpl10a       | IC       | ribosomal protein L10A        | translation          | 1.39          | 1.19   | 0.86   | 321.67                                           | 35.57  | 375.29  | 62.07  | 445.74  | 15.86  |
| U28917   | Rpl13        | IC       | ribosomal protein L13         | translation          | 1.45          | 1.13   | 0.78   | 686.45                                           | 67.45  | 876.20  | 214.70 | 994.23  | 173.03 |
| AB020237 | Rpl27a; L27A | IC       | ribosomal protein L27A        | translation          | 1.52          | 1.23   | 0.81   | 802.94                                           | 118.33 | 993.10  | 189.15 | 1220.18 | 224.09 |
| K02928   | Rpl30        | IC       | ribosomal protein L30         | translation          | 1.38          | 1.23   | 0.88   | 4567.81                                          | 578.59 | 5163.62 | 916.66 | 6325.97 | 906.57 |
| AW047116 | Rpl37        | IC       | ribosomal protein L37         | translation          | 1.51          | 1.16   | 0.77   | 1241.10                                          | 268.40 | 1608.82 | 313.60 | 1871.42 | 295.80 |
| U29402   | Rplp1        | IC       | ribosomal protein, large, P1  | translation          | 1.32          | 1.11   | 0.84   | 3252.91                                          | 305.21 | 3854.58 | 182.18 | 4283.77 | 660.20 |
| M11408   | Rps16        | IC       | S16 ribosomal protein         | translation          | 1.25          | 1.08   | 0.86   | 947.52                                           | 55.00  | 1097.66 | 189.72 | 1187.64 | 86.89  |
| AW048899 | Rps19        | IC       | ribosomal protein S19         | translation          | 1.41          | 1.19   | 0.84   | 428.55                                           | 61.97  | 507.78  | 52.34  | 602.32  | 50.50  |
| AI837403 | Rps23        | IC       | ribosomal protein S23         | translation          | 1.51          | 1.28   | 0.85   | 1041.42                                          | 83.70  | 1226.10 | 221.59 | 1568.91 | 249.66 |
| AI854238 | Rps27        | IC       | ribosomal protein S27         | translation          | 1.63          | 1.28   | 0.78   | 1051.91                                          | 232.46 | 1344.24 | 251.31 | 1717.66 | 446.78 |
| X73829   | Rps8         | IC       | ribosomal protein S8          | translation          | 1.29          | 1.04   | 0.81   | 1117.45                                          | 79.37  | 1377.55 | 198.18 | 1436.39 | 204.25 |

| Genbank  | Common         | location | Description                                                  | Function                                  | Average Signal Intensities & Standard Deviations |      |      |         |        |         |        |         |        |  |
|----------|----------------|----------|--------------------------------------------------------------|-------------------------------------------|--------------------------------------------------|------|------|---------|--------|---------|--------|---------|--------|--|
|          |                |          |                                                              |                                           | Fold changes*                                    |      |      | LMN     |        | MMN     |        | IML     |        |  |
|          |                |          |                                                              |                                           | IML                                              | LMN  | MMN  | Average | SD     | Average | SD     | Average | SD     |  |
| AW061337 | Ak4            | mit      | adenylate kinase 4                                           | nucleotide transport & metabolism         | 1.38                                             | 1.37 | 1.00 | 56.10   | 10.76  | 56.34   | 10.53  | 77.15   | 10.82  |  |
| AA870675 | Atp5c1         | mit      | ATP synthase, F1 gamma polypeptide 1                         | ATP synthesis; proton transport           | 0.83                                             | 0.76 | 0.92 | 2814.53 | 266.68 | 3058.26 | 448.28 | 2322.67 | 219.90 |  |
| AW046124 | Cyba           | mit, ER  | cytochrome b-245, alpha polypeptide                          | electron transport                        | 1.45                                             | 1.35 | 0.93 | 70.78   | 5.26   | 76.00   | 14.46  | 102.88  | 23.76  |  |
| AF023482 | Hs1bp1         | mit, ER  | HS1 binding protein                                          | signal transduction                       | 0.76                                             | 0.77 | 1.02 | 587.91  | 69.12  | 578.68  | 56.57  | 448.09  | 99.03  |  |
| M21050   | lys            | EC, mit  | lysozyme                                                     | carbohydrate metabolism                   | 4.49                                             | 2.82 | 0.63 | 44.54   | 16.27  | 71.04   | 37.29  | 200.10  | 188.88 |  |
| AW046205 | Ndufa4         | mit      | NADH dehydrogenase 1 alpha subcomplex, 4                     | electron transport chain                  | 0.86                                             | 0.89 | 1.04 | 33.09   | 1.65   | 31.95   | 1.91   | 28.56   | 2.41   |  |
| AI842259 | Pdk3           | mit      | pyruvate dehydrogenase kinase, isoenzyme 3                   | phosphorylates pyruvate dehydr.           | 0.61                                             | 0.75 | 1.23 | 666.71  | 88.68  | 540.48  | 117.78 | 405.10  | 45.21  |  |
| AI848685 | Timm13a        | mit      | translocase of inner mitochondrial membrane 13               | protein-mitochondrial targeting           | 0.86                                             | 0.85 | 0.99 | 93.83   | 6.43   | 94.52   | 7.33   | 80.45   | 5.68   |  |
| AW125884 | Acas2l         | mit      | acetyl-Coenzyme A synthetase 2                               | metabolism                                | 1.50                                             | 1.01 | 0.67 | 150.65  | 35.63  | 223.41  | 58.77  | 226.19  | 55.46  |  |
| AV356510 | AW491445       | mit      | expressed sequence AW491445                                  | transport                                 | 0.86                                             | 1.04 | 1.21 | 116.13  | 11.12  | 95.99   | 5.66   | 99.67   | 9.25   |  |
| AV102186 | Bad            | mit      | Bcl-associated death promoter                                | integrates glucose metabolism & apoptosis | 0.85                                             | 1.01 | 1.19 | 341.73  | 27.63  | 286.48  | 19.95  | 290.40  | 22.95  |  |
| AV381947 | Glul           | mit      | glutamate-ammonia ligase                                     | glutamine synthetase                      | 0.90                                             | 1.01 | 1.12 | 721.82  | 45.09  | 643.90  | 32.13  | 650.13  | 41.95  |  |
| M58567   | Hsd3b1         | ER, mit  | hydroxysteroid dehydrogenase-1, delta<5>-3-beta              | steroid hormone biosynthesis              | 0.89                                             | 1.01 | 1.13 | 86.53   | 3.59   | 76.60   | 2.02   | 76.99   | 1.64   |  |
| AW047808 | Immt           | mit      | inner membrane protein, mitochondrial                        |                                           | 0.82                                             | 0.92 | 1.12 | 135.55  | 3.72   | 121.17  | 9.22   | 111.50  | 3.34   |  |
| AB020203 | Ak3l           | mit      | adenylate kinase 3 alpha-like                                | ATP metabolism                            | 0.83                                             | 0.91 | 1.09 | 30.43   | 2.10   | 27.90   | 1.92   | 25.30   | 2.95   |  |
| U89906   | Amacr          | mit      | alpha-methylacyl-CoA racemase                                | metabolism                                | 0.89                                             | 0.94 | 1.05 | 129.68  | 9.45   | 123.00  | 9.08   | 115.16  | 5.54   |  |
| M13071   | Araf; A-Raf    | IC, mit  | A-raf peptide                                                | signal transduction                       | 1.22                                             | 1.09 | 0.90 | 134.29  | 15.40  | 149.88  | 21.63  | 163.63  | 10.85  |  |
| U29530   | Atp5f1         | mit      | ATP synthase, F0 complex                                     | ATP synthesis                             | 0.88                                             | 0.90 | 1.02 | 106.03  | 3.85   | 104.22  | 9.40   | 93.83   | 6.54   |  |
| AF017175 | Cpt1a          | mit      | carntine palmitoyltransferase 1, liver                       | fatty acid metabolism                     | 0.62                                             | 0.78 | 1.26 | 1262.84 | 353.79 | 1003.48 | 253.56 | 778.17  | 140.94 |  |
| AW124813 | Dlat           | mit      | E2 component of pyruvate dehydrogenase complex               | acetyl-CoA biosynthesis from pyruvate     | 0.77                                             | 0.86 | 1.12 | 692.39  | 67.43  | 620.72  | 116.94 | 536.27  | 29.53  |  |
| D49920   | Fdxr           | mit      | ferredoxin reductase                                         | electron transport                        | 0.93                                             | 0.96 | 1.03 | 110.36  | 4.54   | 106.94  | 3.43   | 102.49  | 2.08   |  |
| AI844626 | Gatm           | mit      | glycine amidinotransferase                                   | creatine biosynthesis                     | 1.38                                             | 1.29 | 0.94 | 1152.51 | 173.36 | 1230.49 | 254.75 | 1591.93 | 250.98 |  |
| U51167   | ldh2           | mit      | isocitrate dehydrogenase                                     | tricarboxylic acid cycle                  | 1.39                                             | 1.06 | 0.76 | 214.29  | 25.72  | 282.53  | 61.51  | 298.68  | 56.49  |  |
| AI838061 | ldh3b          | mit      | isocitrate dehydrogenase 3 (NAD+) beta                       | tricarboxylic acid cycle                  | 0.91                                             | 0.98 | 1.08 | 65.68   | 4.37   | 60.62   | 2.50   | 59.49   | 3.41   |  |
| AI875934 | Lyp1a1         | mit      | lysophospholipase 1                                          | lipid metabolism                          | 0.83                                             | 0.94 | 1.14 | 935.25  | 99.06  | 818.82  | 101.03 | 772.56  | 72.10  |  |
| AW124337 | Mgst1          | mit, mic | microsomal glutathione S-transferase 1                       | glutathione metabolism                    | 1.34                                             | 1.20 | 0.90 | 38.83   | 5.28   | 43.37   | 7.99   | 52.05   | 4.48   |  |
| U84903   | Mrpl23; Rpl23  | mit      | L23 mitochondrial-related protein                            | mitochondrial large ribosomal subunit     | 1.25                                             | 1.04 | 0.83 | 395.72  | 24.61  | 474.20  | 56.63  | 494.71  | 64.03  |  |
| AI853575 | Mrps2          | mit      | mitochondrial ribosomal protein S2                           | constituent of mitochondrial ribosome     | 0.71                                             | 0.77 | 1.08 | 242.59  | 47.78  | 223.60  | 44.93  | 172.50  | 24.86  |  |
| AI875598 | Mtif2          | mit      | mitochondrial translational initiation factor 2              | mitochondrial protein synthesis           | 0.72                                             | 0.85 | 1.17 | 290.75  | 56.70  | 247.71  | 42.67  | 210.50  | 32.09  |  |
| AI842675 | Ppilf          | mit      | peptidylprolyl isomerase F (cyclophilin F)                   | protein folding                           | 0.80                                             | 0.87 | 1.09 | 331.26  | 26.07  | 305.01  | 24.76  | 265.20  | 32.32  |  |
| M28723   | Prdx3          | mit      | peroxiredoxin 3                                              | peroxidase reaction                       | 0.80                                             | 0.90 | 1.13 | 1583.84 | 36.55  | 1403.88 | 65.24  | 1268.76 | 202.86 |  |
| AI846308 | Sfxn1          | mit      | sideroflexin 1                                               | cation transporter                        | 1.54                                             | 1.26 | 0.82 | 157.70  | 32.42  | 192.54  | 33.72  | 242.58  | 41.99  |  |
| AI848354 | Slc25a1        | mit      | olute carrier family 25 (mitochondrial carrier; c), member 1 | citrate transporter                       | 0.67                                             | 0.77 | 1.16 | 1729.87 | 290.88 | 1487.05 | 325.73 | 1150.60 | 143.63 |  |
| U68564   | ldh3g          | mit      | isocitrate dehydrogenase 3 (NAD+), gamma                     | TCA cycle                                 | 0.79                                             | 0.73 | 0.93 | 1028.78 | 122.01 | 1111.88 | 151.23 | 815.45  | 222.91 |  |
| AI843685 | Mrpl15         | mit      | mitochondrial ribosomal protein L15                          | mitochondrial protein biosynthesis        | 0.87                                             | 0.83 | 0.96 | 225.16  | 23.69  | 233.77  | 29.63  | 195.01  | 14.93  |  |
| AI848871 | Ndufb10        | mit      | NADH dehydrogenase (ubiquinone) 1 beta subcomplex, 10        | electron transport                        | 0.79                                             | 0.75 | 0.95 | 591.41  | 58.71  | 623.05  | 128.70 | 466.93  | 71.83  |  |
| U10404   | Slc25a5        | mit      | solute carrier family 25, member 5                           | adenine nucleotide translocator           | 0.92                                             | 0.89 | 0.97 | 115.25  | 4.61   | 118.72  | 6.28   | 105.67  | 8.14   |  |
| M20625   | Cyct           | mit      | cytochrome c, testis                                         | electron transport                        | 0.96                                             | 1.05 | 1.10 | 97.36   | 6.13   | 88.84   | 3.15   | 93.29   | 3.82   |  |
| AB028071 | Keg1           | mit      | kidney expressed gene 1                                      | unknown                                   | 0.93                                             | 1.05 | 1.14 | 29.89   | 2.40   | 26.32   | 1.51   | 27.72   | 1.45   |  |
| AV339603 | Mrps18a        | mit      | mitochondrial ribosomal protein S18A                         | mitochondrial protein translation         | 0.89                                             | 1.03 | 1.15 | 1023.33 | 73.16  | 887.99  | 74.27  | 911.93  | 62.65  |  |
| AW125634 | Mrs3/4-pending | mit      | putative mitochondrial solute carrier                        | mitochondrial transport                   | 1.06                                             | 0.90 | 0.85 | 241.12  | 11.99  | 284.44  | 34.72  | 256.09  | 21.37  |  |
| AA189555 | Sfxn2          | mit      | sideroflexin 2                                               | cation transport                          | 0.93                                             | 1.02 | 1.10 | 77.73   | 5.95   | 70.73   | 1.77   | 72.47   | 3.88   |  |
